# Supplementary material for: Synthesis of pendant fullerene dimers by an aminomethylation reaction of fulleropyrrolidines bearing ketone moieties
Source: Royal Society of Chemistry journal article supplement (doi:10.1039/d3ob00365e), 2023-01-01

# Electronic Supplementary Information

## Synthesis of pendant fullerene dimers by aminomethylation reaction of fulleropyrrolidines bearing ketone moieties

Qian-Na Peng,<sup>‡a</sup> Hui-Juan Wang,<sup>‡b</sup> Xing-Yu Wang,<sup>a</sup> Fa-Bao Li,<sup>\*a</sup> Li Liu,<sup>a</sup> Xiaoli  
Wang,<sup>c</sup> Ping Wu,<sup>\*c</sup> and Chao-Yang Liu<sup>\*b</sup>

*<sup>a</sup>Collaborative Innovation Center for Advanced Organic Chemical*

*Materials Co-constructed by the Province and Ministry, Ministry of Education Key*

*Laboratory for the Synthesis and Application of Organic Functional Molecules,*

*College of Chemistry and Chemical Engineering, Hubei University, Wuhan 430062,*

*China*

*E-mail: lfb0615@hubu.edu.cn*

*<sup>b</sup>State Key Laboratory of Magnetic Resonance and Atomic and Molecular Physics, W  
uhan Center for Magnetic Resonance, Wuhan Institute of Physics and Mathematics, I  
nnovation Academy for Precision Measurement Science and Technology, Chinese Aca  
demy of Sciences, Wuhan 430071, China*

*E-mail: chyliu@apm.ac.cn*

*<sup>c</sup>Shandong Provincial Key Laboratory of Monocrystalline Silicon Semiconductor  
Materials and Technology, College of Chemistry and Chemical Engineering, Dezhou  
University, Dezhou 253023, China*

*E-mail: wuping@mail.ustc.edu.cn*

*‡These authors contributed equally to this work.*

|                                                                                        |         |
|----------------------------------------------------------------------------------------|---------|
| Computational results for mechanistic study                                            | S3-S35  |
| Control experiments for mechanistic study                                              | S35     |
| Experimental procedures and spectral data for compounds <b>1a-l</b><br>and <b>2a-e</b> | S35-S45 |
| Typical MALDI-TOF MS of fulleropyrrolidines                                            | S45-S46 |
| Typical UV-vis spectra of fulleropyrrolidines                                          | S46-S47 |
| <sup>1</sup> H NMR spectrum of compound <b>1b</b>                                      | S48-S49 |
| <sup>13</sup> C NMR spectrum of compound <b>1b</b>                                     | S50     |
| <sup>1</sup> H NMR spectrum of compound <b>1c</b>                                      | S51-S52 |
| <sup>13</sup> C NMR spectrum of compound <b>1c</b>                                     | S53     |
| <sup>1</sup> H NMR spectrum of compound <b>1d</b>                                      | S54-S55 |
| <sup>13</sup> C NMR spectrum of compound <b>1d</b>                                     | S56     |
| <sup>1</sup> H NMR spectrum of compound <b>1e</b>                                      | S57-S58 |
| <sup>13</sup> C NMR spectrum of compound <b>1e</b>                                     | S59     |
| <sup>1</sup> H NMR spectrum of compound <b>1j</b>                                      | S60-S61 |
| <sup>13</sup> C NMR spectrum of compound <b>1j</b>                                     | S62     |
| <sup>1</sup> H NMR spectrum of compound <b>1l</b>                                      | S63-S64 |
| <sup>13</sup> C NMR spectrum of compound <b>1l</b>                                     | S65     |
| <sup>1</sup> H NMR spectrum of compound <b>2c</b>                                      | S66-S67 |
| <sup>13</sup> C NMR spectrum of compound <b>2c</b>                                     | S68     |
| <sup>1</sup> H NMR spectrum of compound <b>3aa</b>                                     | S69-S70 |
| <sup>1</sup> H NMR spectrum of compound <b>3bb</b>                                     | S71-S72 |
| <sup>13</sup> C NMR spectrum of compound <b>3bb</b>                                    | S73     |
| <sup>1</sup> H NMR spectrum of compound <b>3cc</b>                                     | S74-S75 |
| <sup>13</sup> C NMR spectrum of compound <b>3cc</b>                                    | S76     |
| <sup>1</sup> H NMR spectrum of compound <b>3dd</b>                                     | S77-S78 |
| <sup>1</sup> H NMR spectrum of compound <b>3ee</b>                                     | S79-S80 |
| <sup>13</sup> C NMR spectrum of compound <b>3ee</b>                                    | S81     |
| <sup>1</sup> H NMR spectrum of compound <b>3fa</b>                                     | S82-S83 |
| <sup>1</sup> H NMR spectrum of compound <b>3fb</b>                                     | S84-S85 |
| <sup>1</sup> H NMR spectrum of compound <b>3ga</b>                                     | S86-S87 |
| <sup>13</sup> C NMR spectrum of compound <b>3ga</b>                                    | S88     |
| <sup>1</sup> H NMR spectrum of compound <b>3ha</b>                                     | S89-S90 |
| <sup>1</sup> H NMR spectrum of compound <b>3ia</b>                                     | S91-S92 |
| <sup>1</sup> H NMR spectrum of compound <b>3jd</b>                                     | S93-S94 |
| <sup>13</sup> C NMR spectrum of compound <b>3jd</b>                                    | S95     |
| <sup>1</sup> H NMR spectrum of compound <b>3kd</b>                                     | S96-S97 |
| <sup>1</sup> H NMR spectrum of compound <b>3ld</b>                                     | S98-S99 |

## Computational results for mechanistic study

Fig. S1 Optimized transition-state geometries of different reaction pathways

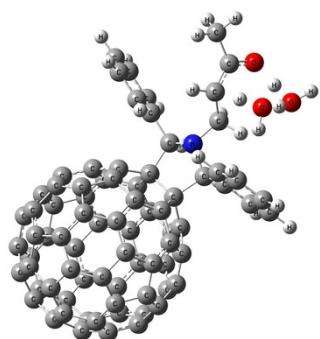

**Ts1a-H<sub>2</sub>O**

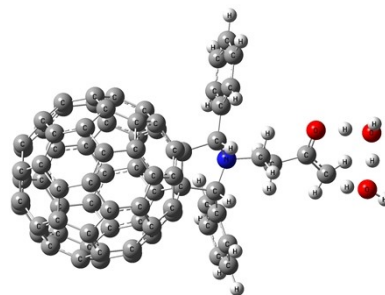

**Ts1b-H<sub>2</sub>O**

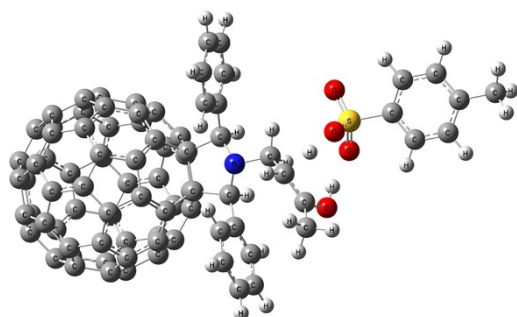

**Ts1a-TsOH**

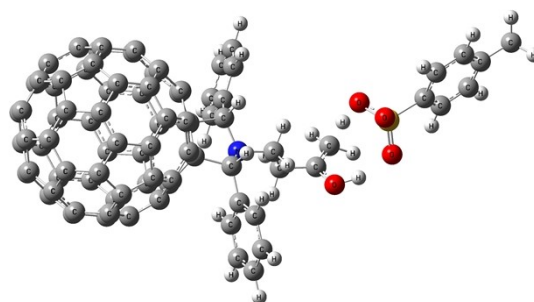

**Ts1b-TsOH**

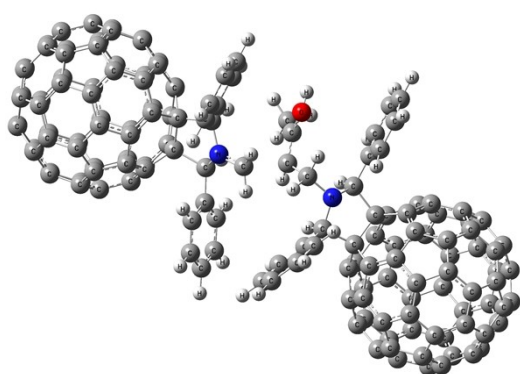

**Ts2a**

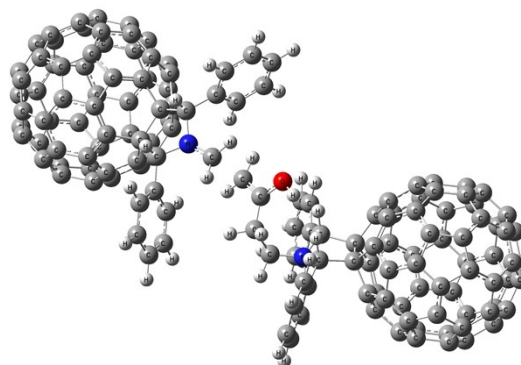

**Ts2b**

**Table S1** Total energy (E) and relative energy ( $\Delta E$ ), solvation effect, entropy (S), relative entropy ( $\Delta S$ ) and entropic contributions to free energy at 313.15 K (TS) for keto–enol tautomerism catalyzed by TsOH and H<sub>2</sub>O.

|                       | In chlorobenzene     |               | In gas phase         |               | Solvation effect (kcal/mol) | S cal/(mol·K) | ΔS cal/(mol·K) | TS (kcal/mol)<br>T = 313.15 K |
|-----------------------|----------------------|---------------|----------------------|---------------|-----------------------------|---------------|----------------|-------------------------------|
|                       | E (a.u)              | ΔE (kcal/mol) | E (a.u)              | ΔE (kcal/mol) |                             |               |                |                               |
| <b>1</b>              | -<br>3113.211<br>584 |               | -<br>3113.1<br>32237 |               |                             | 232.80<br>8   |                |                               |
| H <sub>2</sub> O      | -<br>76.42699<br>78  |               | -<br>76.420<br>707   |               |                             | 45.136        |                |                               |
| TsOH                  | -<br>895.3080<br>111 |               | -<br>895.28<br>93948 |               |                             | 107.40<br>1   |                |                               |
| TsO <sup>-</sup>      | -<br>894.8550<br>085 |               | -<br>894.77<br>55879 |               |                             | 102.82<br>3   |                |                               |
| TS1a-TsOH             | -<br>4008.506<br>634 | 8.1           | -<br>4008.4<br>14118 | 4.7           | 3.4                         | 288.29<br>9   | -51.9          | -16.3                         |
| TS1b-TsOH             | -<br>4008.502<br>958 | 10.4          | -<br>4008.4<br>09109 | 7.9           | 2.5                         | 291.06<br>8   | -49.1          | -15.4                         |
| TS1a-H <sub>2</sub> O | -<br>3266.031<br>607 | 21.3          | -<br>3265.9<br>51335 | 14.0          | 7.3                         | 242.71<br>6   | -80.4          | -25.2                         |
| TS1b-H <sub>2</sub> O | -<br>3266.029<br>133 | 22.9          | -<br>3265.9<br>47625 | 16.3<br>S5    | 6.6                         | 245.35<br>9   | -77.7          | -24.3                         |

**Table S2** Calculated thermal corrections to Gibbs free energies ( $TCG$ ), electronic energies ( $E$ ) in solvent, Gibbs free energies ( $G$ ), relative Gibbs free energies ( $\Delta G$  relative to reactants **1a** and **E1**), and imaginary frequencies only for transition states

| Species                    | $TCG(\text{a.u.})^a$<br>(1) | $E(\text{a.u.})^b$<br>(2) | $G(\text{a.u.})$<br>(3)=(1)+(2) | $\Delta G$<br>(kcal/mol) | Imaginary<br>frequency<br>( $\text{cm}^{-1}$ ) |
|----------------------------|-----------------------------|---------------------------|---------------------------------|--------------------------|------------------------------------------------|
| <b>1a</b>                  | 0.630198                    | -<br>3113.21158<br>4      | -3112.581386                    |                          |                                                |
| <b>E1</b>                  | 0.56531                     | -<br>2920.47681<br>1      | -2919.911501                    |                          |                                                |
| <b>H<sub>2</sub>O</b>      | 0.002417                    | -<br>76.4269978           | -76.4245808                     |                          |                                                |
| <b>TsOH</b>                | 0.100529                    | -<br>895.308011<br>1      | -895.2074821                    |                          |                                                |
| <b>TsO<sup>-</sup></b>     | 0.090541                    | -<br>894.855008<br>5      | -894.7644675                    |                          |                                                |
| <b>TS1a-H<sub>2</sub>O</b> | 0.671294                    | -<br>3266.03160<br>7      | -3265.360313                    | 44.1                     | 1491.283<br>6i                                 |
| <b>TS1b-H<sub>2</sub>O</b> | 0.669277                    | -<br>3266.02913<br>3      | -3265.359856                    | 44.4                     | 1678.384<br>5i                                 |

|                  |          |                      |              |       |                |
|------------------|----------|----------------------|--------------|-------|----------------|
| <b>TS1a-TsOH</b> | 0.753496 | -<br>4008.50663<br>4 | -4007.753138 | 22.4  | 1150.575<br>9i |
| <b>TS1b-TsOH</b> | 0.75274  | -<br>4008.50295<br>8 | -4007.750218 | 24.3  | 1142.496<br>6i |
| <b>G1</b>        | 0.63576  | -<br>3113.19871<br>9 | -3112.562959 | 11.6  |                |
| <b>I1</b>        | 0.637798 | -<br>3113.19567<br>8 | -3112.55788  | 14.8  |                |
| <b>TS2a</b>      | 1.223432 | -<br>6033.67981      | -6032.456378 | 22.9  |                |
| <b>TS2b</b>      | 1.221825 | -<br>6033.66352<br>2 | -6032.441697 | 32.1  | 207.3654<br>i  |
| <b>3aa</b>       | 1.21366  | -<br>6033.29959<br>3 | -6032.085933 | -22.6 |                |
| <b>4aa</b>       | 1.211713 | -<br>6033.29656<br>7 | -6032.084854 | -22.0 |                |

<sup>a</sup>values given at B3LYP/6-31G(d) level at 40 °C and 1 atm. <sup>b</sup>values given at M062x/6-311++G(d,p) level in solvent chlorobenzene

**Table S3** Cartesian coordinates for the reaction of **1a** and **E1** at B3LYP/6-31G(d) level

| <b>1a</b> |          |          |           | <b>E1</b> |          |          |          |
|-----------|----------|----------|-----------|-----------|----------|----------|----------|
| C         | 0.144493 | 2.590784 | -1.059347 | C         | 0.329062 | 1.175744 | 2.795521 |

|   |          |           |           |   |          |           |           |
|---|----------|-----------|-----------|---|----------|-----------|-----------|
| C | 0.200425 | -2.567652 | -1.051224 | C | 0.329064 | -1.175733 | 2.795526  |
| C | 0.236644 | 0.749845  | -2.642889 | C | 0.695952 | 2.58603   | -1.013731 |
| C | 0.252737 | -0.730352 | -2.640508 | C | 0.695957 | -2.586034 | -1.013721 |
| C | 0.368676 | 2.592648  | 0.373519  | C | 0.800754 | 0.740239  | -2.596139 |
| C | 0.424078 | -2.559606 | 0.381644  | C | 0.800755 | -0.740249 | -2.596136 |
| C | 0.826645 | 1.455095  | -1.61602  | C | 0.887386 | 2.583128  | 0.423914  |
| C | 0.858269 | -1.419553 | -1.611711 | C | 0.887391 | -2.583126 | 0.423924  |
| C | 0.938285 | 0.764915  | 1.86338   | C | 1.375598 | 1.445935  | -1.561907 |
| C | 0.953742 | -0.714846 | 1.865341  | C | 1.375601 | -1.44594  | -1.561901 |
| C | 1.192994 | 1.460345  | 0.702772  | C | 1.39827  | 0.74022   | 1.923145  |
| C | 1.223597 | -1.408598 | 0.707042  | C | 1.398271 | -0.740211 | 1.923148  |
| C | 1.766429 | 0.833946  | -0.576709 | C | 1.690877 | 1.442383  | 0.775083  |
| C | 1.784307 | -0.774499 | -0.574222 | C | 1.69088  | -1.442378 | 0.775089  |
| C | 3.274619 | 1.208559  | -0.87102  | C | 2.282296 | 0.810489  | -0.496314 |
| C | 3.301068 | -1.114739 | -0.869736 | C | 2.282298 | -0.810488 | -0.496311 |
| C | 3.738559 | 2.532932  | -0.296892 | C | 3.783643 | 1.208976  | -0.784352 |
| C | 3.790531 | -2.43611  | -0.309958 | C | 3.783645 | -1.208971 | -0.78435  |
| C | 3.805434 | 3.663039  | -1.119677 | C | 4.323174 | 2.525544  | -0.28611  |
| C | 3.933428 | -3.538865 | -1.159464 | C | 4.323186 | -2.525536 | -0.286108 |
| C | 4.084396 | -2.593895 | 1.052882  | C | 4.432457 | 2.833545  | 1.081266  |
| C | 4.089551 | 2.661243  | 1.055016  | C | 4.43249  | -2.833529 | 1.081269  |
| C | 4.205736 | 4.89868   | -0.606588 | C | 4.728974 | 3.476732  | -1.232673 |
| C | 4.354775 | -4.775129 | -0.664321 | C | 4.728977 | -3.476727 | -1.232671 |
| C | 4.495815 | 3.892486  | 1.567835  | C | 4.939795 | 4.068031  | 1.48401   |
| C | 4.510731 | -3.825394 | 1.548729  | C | 4.939837 | -4.068011 | 1.484011  |
| C | 4.552903 | 5.016071  | 0.739153  | C | 5.223809 | 4.716566  | -0.827009 |
| C | 4.645277 | -4.921111 | 0.691756  | C | 5.223822 | -4.716558 | -0.827008 |
| C | 5.455482 | 0.078759  | -0.822023 | C | 5.332544 | 5.012281  | 0.531864  |
| C | 6.445771 | -0.099928 | 0.330124  | C | 5.332576 | -5.012265 | 0.531865  |



|   |           |           |           |   |           |           |           |
|---|-----------|-----------|-----------|---|-----------|-----------|-----------|
| C | 7.896693  | -0.042675 | -0.12862  | C | 5.691704  | 0.000003  | 0.23882   |
| C | 8.957537  | -0.219606 | 0.94522   | C | -0.137451 | -3.031253 | 1.262778  |
| C | -0.092512 | -1.160534 | 2.760106  | C | -0.137457 | 3.031257  | 1.262766  |
| C | -0.117662 | 1.190624  | 2.756544  | C | -0.329417 | 0.000006  | 3.334148  |
| C | -0.573192 | -3.024639 | 1.245485  | C | -0.423449 | -2.310964 | 2.479422  |
| C | -0.638513 | 3.03885   | 1.23581   | C | -0.423453 | 2.310973  | 2.479413  |
| C | -0.752552 | 0.008923  | 3.31072   | C | -0.45806  | -1.176463 | -3.161164 |
| C | -0.839107 | -2.30673  | 2.467753  | C | -0.458062 | 1.176449  | -3.161169 |
| C | -0.888916 | 2.319406  | 2.460478  | C | -0.511695 | -3.033587 | -1.558567 |
| C | -1.012124 | -3.036225 | -1.569726 | C | -0.511701 | 3.033579  | -1.558579 |
| C | -1.015054 | -1.181084 | -3.172828 | C | -1.10272  | -2.311558 | -2.658767 |
| C | -1.04051  | 1.17138   | -3.176622 | C | -1.102725 | 2.311545  | -2.658777 |
| C | -1.077708 | 3.031446  | -1.579562 | C | -1.234079 | -0.000008 | -3.509298 |
| C | -1.636442 | -2.324235 | -2.657852 | C | -1.396874 | -3.487941 | 0.697083  |
| C | -1.686424 | 2.302532  | -2.665345 | C | -1.39688  | 3.487941  | 0.697069  |
| C | -1.812627 | -0.013864 | -3.50376  | C | -1.580389 | -3.489039 | -0.684381 |
| C | -1.840074 | -3.49429  | 0.707899  | C | -1.580395 | 3.489033  | -0.684395 |
| C | -1.915299 | 3.478972  | 0.696549  | C | -1.709186 | 0.000005  | 3.533559  |
| C | -2.055187 | -3.500568 | -0.6695   | C | -1.86114  | -2.311654 | 2.677781  |
| C | -2.12766  | -0.00561  | 3.546756  | C | -1.861144 | 2.31166   | 2.677772  |
| C | -2.130547 | 3.476174  | -0.680854 | C | -2.464468 | -3.040016 | 1.573795  |
| C | -2.272128 | -2.319515 | 2.696873  | C | -2.464473 | 3.040017  | 1.573782  |
| C | -2.321952 | 2.301764  | 2.689392  | C | -2.492077 | -1.177304 | 3.191629  |
| C | -2.893183 | -3.055695 | 1.607242  | C | -2.492079 | 1.177312  | 3.191625  |
| C | -2.904879 | -1.191907 | 3.224741  | C | -2.542708 | -2.311754 | -2.475662 |
| C | -2.930317 | 1.162523  | 3.221006  | C | -2.542712 | 2.311739  | -2.475671 |
| C | -2.958721 | 3.020675  | 1.597311  | C | -2.617848 | -0.000009 | -3.340752 |
| C | -3.071557 | -2.336931 | -2.440097 | C | -2.838947 | -3.040485 | -1.253045 |
| C | -3.121444 | 2.284958  | -2.447596 | C | -2.838952 | 3.040474  | -1.253057 |

|   |           |           |           |   |           |           |           |
|---|-----------|-----------|-----------|---|-----------|-----------|-----------|
| C | -3.193685 | -0.028441 | -3.308001 | C | -3.285081 | -1.177162 | -2.80718  |
| C | -3.331738 | -3.065752 | -1.208819 | C | -3.285083 | 1.177144  | -2.807184 |
| C | -3.397338 | 3.012003  | -1.218683 | C | -3.673158 | -2.603497 | 1.028996  |
| C | -3.8354   | -1.211803 | -2.757482 | C | -3.673162 | 2.603494  | 1.028986  |
| C | -3.8608   | 1.142579  | -2.761334 | C | -3.75029  | -0.727826 | 2.629767  |
| C | -4.120248 | -2.635103 | 1.090569  | C | -3.750291 | 0.727829  | 2.629765  |
| C | -4.17638  | 2.571947  | 1.082047  | C | -3.864149 | -2.6036   | -0.412512 |
| C | -4.180412 | -0.757221 | 2.689712  | C | -3.864153 | 2.603591  | -0.412523 |
| C | -4.19608  | 0.698556  | 2.687329  | C | -4.329367 | -1.425535 | 1.568102  |
| C | -4.344009 | -2.639976 | -0.346329 | C | -4.329369 | 1.425533  | 1.568096  |
| C | -4.400213 | 2.567323  | -0.354809 | C | -4.354267 | -0.727837 | -1.937707 |
| C | -4.77711  | -1.46344  | 1.642864  | C | -4.354268 | 0.727821  | -1.93771  |
| C | -4.807776 | 1.388213  | 1.638159  | C | -4.637527 | -1.425536 | -0.762133 |
| C | -4.888874 | -0.772375 | -1.863582 | C | -4.63753  | 1.425524  | -0.762138 |
| C | -4.904538 | 0.683444  | -1.865928 | C | -4.92685  | -0.697719 | 0.461728  |
| C | -5.138125 | -1.471089 | -0.680292 | C | -4.926852 | 0.697711  | 0.461725  |
| C | -5.168863 | 1.380468  | -0.684941 | H | 3.90128   | 1.185916  | -1.873789 |
| C | -5.407328 | -0.744008 | 0.548934  | H | 3.90128   | -1.185912 | -1.873787 |
| C | -5.422335 | 0.651759  | 0.546653  | H | 4.107603  | 2.120848  | 1.833119  |
| H | 3.355818  | 1.277925  | -1.972675 | H | 4.107647  | -2.120828 | 1.833122  |
| H | 3.383074  | -1.175535 | -1.972014 | H | 4.647684  | -3.252553 | -2.293574 |
| H | 3.544396  | 3.574924  | -2.171844 | H | 4.647695  | 3.252553  | -2.293575 |
| H | 3.714766  | -3.429051 | -2.219192 | H | 5.018807  | 4.295853  | 2.542734  |
| H | 3.978945  | -1.74321  | 1.71823   | H | 5.018865  | -4.295827 | 2.542735  |
| H | 4.042194  | 1.78792   | 1.69738   | H | 5.526005  | 5.445894  | -1.572249 |
| H | 4.25264   | 5.764904  | -1.26097  | H | 5.526011  | -5.445888 | -1.572248 |
| H | 4.4607    | -5.619233 | -1.340349 | H | 5.720681  | 5.975161  | 0.850155  |
| H | 4.73534   | -3.931372 | 2.606908  | H | 5.72072   | -5.975142 | 0.850156  |
| H | 4.766252  | 3.976233  | 2.617259  | H | 6.160858  | -0.948116 | 0.482663  |

|                            |          |           |           |                            |          |           |           |
|----------------------------|----------|-----------|-----------|----------------------------|----------|-----------|-----------|
| H                          | 4.869648 | 5.975055  | 1.14022   | H                          | 6.16086  | 0.948122  | 0.482662  |
| H                          | 4.976699 | -5.880493 | 1.079802  | N                          | 4.557052 | 0.000003  | -0.342103 |
| H                          | 5.632004 | -0.696688 | -1.577583 |                            |          |           |           |
| H                          | 5.666755 | 1.031972  | -1.315135 |                            |          |           |           |
| H                          | 6.278419 | -1.053933 | 0.846084  |                            |          |           |           |
| H                          | 6.287449 | 0.678526  | 1.089016  |                            |          |           |           |
| H                          | 8.844115 | 0.539673  | 1.728997  |                            |          |           |           |
| H                          | 8.850793 | -1.197779 | 1.430827  | <b>H<sub>2</sub>O</b>      |          |           |           |
| H                          | 9.951136 | -0.140431 | 0.499461  | H                          | 0        | 0.76155   | -0.478874 |
| N                          | 4.037932 | 0.055371  | -0.385048 | H                          | 0        | -0.76155  | -0.478874 |
| O                          | 8.193854 | 0.133924  | -1.296491 | O                          | 0        | 0         | 0.119718  |
|                            |          |           |           |                            |          |           |           |
|                            |          |           |           |                            |          |           |           |
| <b>TS1a-H<sub>2</sub>O</b> |          |           |           | <b>TS1b-H<sub>2</sub>O</b> |          |           |           |
| C                          | 0.007003 | 0.735083  | -2.616893 | C                          | 0.046178 | -2.535808 | -0.527889 |
| C                          | 0.01316  | -0.745128 | -2.609578 | C                          | 0.095847 | 0.762048  | 2.512754  |
| C                          | 0.090642 | 2.584766  | 0.396136  | C                          | 0.131206 | -0.717657 | 2.503759  |
| C                          | 0.114785 | -2.567195 | 0.420659  | C                          | 0.379439 | 0.798135  | -2.039736 |
| C                          | 0.581606 | 1.439467  | -1.580616 | C                          | 0.412684 | -0.680979 | -2.047293 |
| C                          | 0.594153 | -1.434975 | -1.567189 | C                          | 0.578825 | 1.476426  | 1.437536  |
| C                          | 0.619838 | 0.75805   | 1.901912  | C                          | 0.649302 | -1.396011 | 1.421265  |
| C                          | 0.627061 | -0.721664 | 1.909411  | C                          | 0.731737 | 1.493557  | -0.905162 |
| C                          | 0.901219 | 1.448193  | 0.744145  | C                          | 0.797002 | -1.373475 | -0.92117  |
| C                          | 0.915261 | -1.420319 | 0.758639  | C                          | 1.42733  | 0.869572  | 0.314415  |
| C                          | 1.497526 | 0.815836  | -0.521487 | C                          | 1.467158 | -0.735093 | 0.304909  |
| C                          | 1.503046 | -0.792025 | -0.513644 | C                          | 2.949106 | 1.265151  | 0.471852  |
| C                          | 3.015438 | 1.175885  | -0.792158 | C                          | 3.011605 | -1.060481 | 0.455299  |
| C                          | 3.022775 | -1.142259 | -0.773643 | C                          | 3.325447 | 2.598352  | -0.145138 |
| C                          | 3.464219 | 2.522037  | -0.258809 | C                          | 3.36167  | 3.748316  | 0.65184   |

|   |           |           |           |   |           |           |           |
|---|-----------|-----------|-----------|---|-----------|-----------|-----------|
| C | 3.489363  | -2.454589 | -0.172958 | C | 3.429266  | -2.380582 | -0.163092 |
| C | 3.538653  | -3.609213 | -0.962131 | C | 3.574576  | -2.529521 | -1.55052  |
| C | 3.644004  | 3.588101  | -1.146641 | C | 3.613816  | 2.714079  | -1.512156 |
| C | 3.674366  | 2.745105  | 1.109918  | C | 3.640036  | -3.493628 | 0.658048  |
| C | 3.866312  | -2.54389  | 1.176214  | C | 3.665771  | 4.992738  | 0.096456  |
| C | 3.947068  | -4.83079  | -0.421203 | C | 3.925704  | -3.761919 | -2.098059 |
| C | 4.021816  | 4.851176  | -0.684575 | C | 3.92688   | 3.954244  | -2.066533 |
| C | 4.055104  | 4.002707  | 1.574009  | C | 3.94941   | 5.098412  | -1.26525  |
| C | 4.228377  | 5.061374  | 0.678026  | C | 3.986483  | -4.731771 | 0.111216  |
| C | 4.281433  | -3.762856 | 1.718244  | C | 4.130267  | -4.868638 | -1.269024 |
| C | 4.321763  | -4.9114   | 0.919959  | C | 5.120907  | 0.214178  | 0.307136  |
| C | 5.185121  | 0.004735  | -0.700433 | C | 6.090337  | -0.565285 | -0.589482 |
| C | 6.146085  | 0.473524  | 0.394347  | C | 7.544176  | -0.2051   | -0.33333  |
| C | 7.389148  | 1.015047  | 0.029044  | C | 8.539032  | -1.207452 | -0.362603 |
| C | 8.116233  | 1.969138  | 0.952484  | C | -0.043528 | -2.55091  | 0.919286  |
| C | -0.081511 | -2.57744  | -1.016358 | C | -0.073859 | 2.613617  | -0.496949 |
| C | -0.104674 | 2.580824  | -1.040731 | C | -0.165764 | 2.604603  | 0.950257  |
| C | -0.439468 | -1.158333 | 2.784705  | C | -0.705171 | -1.138641 | -2.843694 |
| C | -0.450473 | 1.192861  | 2.773137  | C | -0.759747 | 1.21199   | -2.830219 |
| C | -0.902148 | -3.023768 | 1.266027  | C | -1.019829 | -3.012512 | -1.298052 |
| C | -0.930046 | 3.039825  | 1.237494  | C | -1.076475 | -1.186251 | 3.148648  |
| C | -1.103134 | 0.016852  | 3.31858   | C | -1.131939 | 1.165594  | 3.163285  |
| C | -1.187428 | -2.300699 | 2.480875  | C | -1.161887 | 3.049159  | -1.261035 |
| C | -1.208713 | 2.325538  | 2.459093  | C | -1.197034 | -3.037024 | 1.545479  |
| C | -1.246507 | -1.189939 | -3.165425 | C | -1.340096 | 3.028372  | 1.582785  |
| C | -1.257048 | 1.162621  | -3.176496 | C | -1.40648  | -2.295485 | -2.488187 |
| C | -1.286395 | -3.040416 | -1.557366 | C | -1.427973 | 0.023233  | -3.327297 |
| C | -1.313937 | 3.027315  | -1.585747 | C | -1.514983 | 2.329717  | -2.460155 |
| C | -1.884834 | -2.327852 | -2.659482 | C | -1.727821 | -2.3362   | 2.689089  |

|   |           |           |           |   |           |           |           |
|---|-----------|-----------|-----------|---|-----------|-----------|-----------|
| C | -1.905934 | 2.299116  | -2.681208 | C | -1.83673  | 2.289293  | 2.717598  |
| C | -2.030122 | -0.01881  | -3.51521  | C | -1.855289 | -0.030488 | 3.555495  |
| C | -2.161298 | -3.486926 | 0.704879  | C | -2.225478 | -3.500316 | -0.647828 |
| C | -2.193168 | 3.486403  | 0.672353  | C | -2.312556 | -3.513018 | 0.743493  |
| C | -2.349644 | -3.495936 | -0.676421 | C | -2.389243 | 3.470663  | -0.604591 |
| C | -2.381376 | 3.480936  | -0.708989 | C | -2.476792 | 3.461878  | 0.786745  |
| C | -2.482646 | 0.011525  | 3.527863  | C | -2.818628 | -0.009049 | -3.435631 |
| C | -2.62481  | -2.303988 | 2.681855  | C | -2.854166 | -2.326725 | -2.584386 |
| C | -2.645913 | 2.317433  | 2.660161  | C | -2.962723 | 2.293369  | -2.555787 |
| C | -3.228998 | -3.039343 | 1.582261  | C | -3.176655 | -2.367378 | 2.604363  |
| C | -3.25678  | 3.037082  | 1.553846  | C | -3.24821  | -0.062749 | 3.488203  |
| C | -3.260736 | -1.170946 | 3.193966  | C | -3.285395 | 2.253563  | 2.633047  |
| C | -3.271587 | 1.183595  | 3.183216  | C | -3.36256  | -3.07353  | -1.444736 |
| C | -3.324015 | -2.331362 | -2.469914 | C | -3.505328 | 3.00093   | -1.406945 |
| C | -3.344997 | 2.290728  | -2.491339 | C | -3.539651 | -3.096603 | 1.399604  |
| C | -3.414809 | -0.024528 | -3.346482 | C | -3.547369 | -1.206322 | -3.047727 |
| C | -3.612697 | -3.055023 | -1.241923 | C | -3.602792 | 1.147568  | -3.033209 |
| C | -3.640338 | 3.023016  | -1.270058 | C | -3.682626 | 2.979937  | 1.437344  |
| C | -4.074412 | -1.20242  | -2.805243 | C | -3.922608 | -1.2532   | 2.994884  |
| C | -4.08531  | 1.152079  | -2.816338 | C | -3.97793  | 1.100765  | 3.009504  |
| C | -4.443102 | -2.612745 | 1.040421  | C | -4.542334 | -2.670771 | -0.815851 |
| C | -4.46694  | 2.594432  | 1.016227  | C | -4.632563 | -2.682032 | 0.635485  |
| C | -4.522821 | -0.729948 | 2.632785  | C | -4.664637 | 2.535209  | -0.783417 |
| C | -4.529453 | 0.725862  | 2.626071  | C | -4.755044 | 2.524105  | 0.667903  |
| C | -4.638889 | -2.62047  | -0.400519 | C | -4.77359  | -0.789842 | -2.395811 |
| C | -4.662668 | 2.587022  | -0.424727 | C | -4.807852 | 0.66562   | -2.386792 |
| C | -5.103387 | -1.435506 | 1.576501  | C | -5.059386 | -0.825486 | 2.20325   |
| C | -5.116373 | 1.41624   | 1.563275  | C | -5.09355  | 0.630021  | 2.212246  |
| C | -5.14241  | -0.753959 | -1.933312 | C | -5.26223  | -1.50645  | -1.301092 |

|   |           |           |           |   |           |           |           |
|---|-----------|-----------|-----------|---|-----------|-----------|-----------|
| C | -5.149039 | 0.701914  | -1.940103 | C | -5.329353 | 1.344589  | -1.283333 |
| C | -5.419097 | -1.447693 | -0.753199 | C | -5.407605 | -1.524497 | 1.045375  |
| C | -5.432064 | 1.403952  | -0.766457 | C | -5.474667 | 1.326396  | 1.063163  |
| C | -5.707829 | -0.715454 | 0.468512  | C | -5.798259 | -0.798056 | -0.151238 |
| C | -5.714021 | 0.680377  | 0.462007  | C | -5.830993 | 0.597388  | -0.142541 |
| H | 3.117449  | 1.213872  | -1.893793 | H | 3.12764   | 1.338148  | 1.562042  |
| H | 3.1286    | -1.223328 | -1.872651 | H | 3.150301  | 3.669196  | 1.7159    |
| H | 3.26014   | -3.55103  | -2.011607 | H | 3.198084  | -1.131484 | 1.544471  |
| H | 3.489915  | 3.428568  | -2.211394 | H | 3.427032  | -1.667944 | -2.193198 |
| H | 3.542962  | 1.924438  | 1.807184  | H | 3.53498   | -3.390768 | 1.735705  |
| H | 3.836896  | -1.649308 | 1.789907  | H | 3.601368  | 1.822409  | -2.130592 |
| H | 3.980054  | -5.715276 | -1.051371 | H | 3.688377  | 5.875514  | 0.729863  |
| H | 4.158527  | 5.665419  | -1.391089 | H | 4.040292  | -3.85973  | -3.174411 |
| H | 4.216558  | 4.15792   | 2.637588  | H | 4.147938  | -5.58429  | 0.765445  |
| H | 4.525045  | 6.041583  | 1.041607  | H | 4.154598  | 4.027805  | -3.126677 |
| H | 4.565176  | -3.817573 | 2.766237  | H | 4.192779  | 6.064467  | -1.69934  |
| H | 4.643138  | -5.859176 | 1.34298   | H | 4.40293   | -5.829208 | -1.69782  |
| H | 5.315556  | 0.620299  | -1.606454 | H | 5.251828  | -0.097301 | 1.36032   |
| H | 5.411448  | -1.018379 | -1.019405 | H | 5.411195  | 1.264206  | 0.251812  |
| H | 5.670725  | 0.907667  | 1.268227  | H | 5.875525  | -0.313466 | -1.637922 |
| H | 6.376306  | -2.560126 | 0.913465  | H | 5.967729  | -1.645516 | -0.498236 |
| H | 6.732073  | -0.905108 | 0.844997  | H | 8.24062   | -2.179014 | -0.751091 |
| H | 7.515975  | -1.967007 | -0.314426 | H | 8.878531  | 1.188986  | 0.564186  |
| H | 7.615229  | 2.082086  | 1.917458  | H | 8.900468  | -1.283271 | 1.056096  |
| H | 7.859586  | -0.556435 | -1.416755 | H | 9.526709  | -0.879264 | -0.693741 |
| H | 8.164317  | 2.953308  | 0.470137  | H | 9.603451  | 1.900062  | 1.95993   |
| H | 8.734407  | -1.970927 | -1.666432 | H | 9.670906  | 0.146819  | 1.820847  |
| H | 9.148213  | 1.636048  | 1.106891  | H | 10.183904 | -1.54529  | 2.197729  |
| N | 3.761027  | 0.021826  | -0.278072 | N | 3.696432  | 0.124187  | -0.076035 |

|                  |          |           |           |                  |          |           |           |
|------------------|----------|-----------|-----------|------------------|----------|-----------|-----------|
| O                | 7.147312 | -1.968602 | 0.820056  | O                | 7.783102 | 1.020145  | -0.037566 |
| O                | 7.824073 | -1.683594 | -1.489115 | O                | 9.366729 | -1.023434 | 2.128937  |
| O                | 8.007744 | 0.70743   | -1.057226 | O                | 9.793279 | 1.211352  | 1.302436  |
|                  |          |           |           |                  |          |           |           |
|                  |          |           |           |                  |          |           |           |
| <b>TS1a-TsOH</b> |          |           |           | <b>TS1b-TsOH</b> |          |           |           |
| C                | 0.261663 | 0.863175  | 0.089952  | C                | 0.020921 | 1.052506  | 0.13831   |
| C                | 0.328914 | -0.72505  | -0.130719 | C                | 0.396807 | -1.478278 | 0.795907  |
| C                | 1.7891   | 1.300436  | 0.10464   | C                | 0.648855 | -0.941448 | -1.475869 |
| C                | 1.87808  | -1.019495 | -0.203672 | C                | 0.716541 | 1.295614  | 1.482437  |
| C                | 1.966404 | 3.012676  | -1.776374 | C                | 0.78101  | -1.114404 | 2.068597  |
| C                | 2.0139   | 2.711909  | -0.40619  | C                | 0.945478 | 0.313637  | 2.42204   |
| C                | 2.071943 | 4.330362  | -2.217898 | C                | 0.967312 | 1.827135  | -0.790684 |
| C                | 2.187694 | 3.759281  | 0.505343  | C                | 1.058106 | -2.577585 | 0.148434  |
| C                | 2.229773 | 5.371812  | -1.297547 | C                | 1.216268 | -2.244935 | -1.254212 |
| C                | 2.26479  | -2.204646 | -1.067576 | C                | 1.279575 | -0.078392 | -2.343678 |
| C                | 2.294176 | 5.08205   | 0.065609  | C                | 1.443276 | 1.349377  | -1.990887 |
| C                | 2.365133 | -2.08812  | -2.46123  | C                | 1.630624 | 2.399708  | 1.380771  |
| C                | 2.507458 | -3.448437 | -0.47413  | C                | 1.787607 | 2.726436  | -0.023511 |
| C                | 2.693231 | -3.19562  | -3.241387 | C                | 1.81499  | -1.855937 | 2.75763   |
| C                | 2.828645 | -4.560257 | -1.254978 | C                | 2.040959 | -3.324707 | 0.807573  |
| C                | 2.921229 | -4.43638  | -2.641056 | C                | 2.075849 | 0.413555  | 3.319692  |
| C                | 3.946111 | 0.200351  | -0.36381  | C                | 2.351544 | -2.67556  | -1.94908  |
| C                | 4.785212 | 1.152365  | -1.219498 | C                | 2.429953 | -2.954029 | 2.146192  |
| C                | 5.30349  | 2.365573  | -0.745924 | C                | 2.471542 | -0.491769 | -3.052384 |
| C                | 5.58342  | 3.539225  | -1.629406 | C                | 2.612835 | -0.919127 | 3.527975  |
| C                | 8.948788 | -0.733446 | 0.781545  | C                | 2.713964 | 2.529132  | 2.257216  |
| C                | 9.613525 | 0.446462  | 1.120688  | C                | 2.73215  | 1.776701  | -2.491051 |
| C                | 9.645043 | -1.932343 | 0.635329  | C                | 2.943059 | 1.509507  | 3.251524  |

|   |           |           |           |   |          |           |           |
|---|-----------|-----------|-----------|---|----------|-----------|-----------|
| C | -0.326382 | -1.548664 | 0.984143  | C | 2.996875 | -1.775689 | -2.87318  |
| C | -0.447021 | 1.293698  | 1.381158  | C | 3.023998 | 3.17452   | -0.500644 |
| C | -0.476403 | -1.23293  | -1.337373 | C | 3.229579 | -3.754639 | 0.089073  |
| C | -0.605619 | 1.604131  | -0.940312 | C | 3.366477 | 0.647065  | -3.14527  |
| C | -0.709808 | -1.032611 | 2.202839  | C | 3.381309 | -3.436398 | -1.259684 |
| C | -0.774568 | 0.431818  | 2.405959  | C | 3.509912 | 2.687335  | -1.768221 |
| C | -1.019542 | -0.421273 | -2.307374 | C | 3.863435 | -3.146847 | 2.268738  |
| C | -1.0494   | -2.658955 | 0.429373  | C | 3.988398 | -1.109634 | 3.658598  |
| C | -1.086757 | 1.042149  | -2.101345 | C | 4.0034   | 2.976245  | 1.755928  |
| C | -1.145691 | -2.462355 | -1.004089 | C | 4.154701 | 3.29125   | 0.40636   |
| C | -1.275396 | 2.443354  | 1.139826  | C | 4.359475 | -3.643088 | 0.994918  |
| C | -1.374669 | 2.633853  | -0.294198 | C | 4.376028 | 1.312279  | 3.37291   |
| C | -1.812597 | -1.623799 | 2.92908   | C | 4.431392 | -1.96581  | -2.762148 |
| C | -1.916342 | 0.704067  | 3.252308  | C | 4.628198 | -2.242688 | 3.008915  |
| C | -2.100146 | -3.263276 | 1.128832  | C | 4.670532 | -2.995108 | -1.763005 |
| C | -2.221887 | -0.817654 | -3.008226 | C | 4.746847 | 0.465737  | -3.054232 |
| C | -2.292771 | -2.879239 | -1.687984 | C | 4.889286 | 0.02882   | 3.571436  |
| C | -2.326604 | 1.508626  | -2.683116 | C | 4.943833 | 2.492571  | -1.658026 |
| C | -2.367474 | 2.739872  | 1.963533  | C | 5.033522 | 2.22066   | 2.446909  |
| C | -2.492817 | -2.731234 | 2.410788  | C | 5.289914 | -0.867761 | -2.849723 |
| C | -2.556642 | -0.558191 | 3.575959  | C | 5.344393 | 2.867179  | -0.311173 |
| C | -2.561154 | 3.119878  | -0.853417 | C | 5.551097 | 1.403712  | -2.287378 |
| C | -2.696988 | 1.846971  | 3.047405  | C | 5.598603 | -3.215106 | 0.513965  |
| C | -2.846326 | -2.035196 | -2.718208 | C | 5.75728  | -2.884754 | -0.893314 |
| C | -3.026946 | 0.367185  | -3.242302 | C | 5.916325 | -1.801612 | 2.510862  |
| C | -3.051005 | 2.542479  | -2.080885 | C | 6.077658 | -0.397095 | 2.858544  |
| C | -3.29927  | -3.678327 | 0.419426  | C | 6.176045 | 1.808633  | 1.757973  |
| C | -3.39327  | -3.489024 | -0.958584 | C | 6.334834 | 2.138887  | 0.350767  |
| C | -3.607211 | 3.225117  | 1.378845  | C | 6.392667 | -2.276807 | 1.287018  |



|   |           |           |           |   |            |           |           |
|---|-----------|-----------|-----------|---|------------|-----------|-----------|
| C | -3.701666 | 3.410859  | 0.000427  | C | 6.419874   | -0.755084 | -1.948294 |
| C | -3.939198 | -2.806804 | 2.506027  | C | 6.581604   | 0.649447  | -1.600731 |
| C | -3.945473 | -0.634833 | 3.680783  | C | 6.64975    | -1.742884 | -0.988103 |
| C | -4.143384 | 1.766962  | 3.141808  | C | 6.70879    | 0.474296  | 1.968208  |
| C | -4.293374 | -2.108624 | -2.633839 | C | 6.96615    | 1.008232  | -0.306873 |
| C | -4.418913 | 0.296476  | -3.177796 | C | 7.043559   | -1.367206 | 0.359123  |
| C | -4.439541 | -3.39365  | 1.272973  | C | 7.198429   | -0.020659 | 0.692547  |
| C | -4.497744 | 2.46451   | -1.998022 | C | -0.158442  | -0.499971 | -0.245964 |
| C | -4.633185 | -3.009957 | -1.544335 | C | -1.464778  | 1.593585  | 0.159152  |
| C | -4.652118 | -1.779252 | 3.127383  | C | -1.591775  | 3.515359  | -1.507369 |
| C | -4.707885 | 2.62069   | 2.10872   | C | -1.631469  | 3.061399  | -0.180617 |
| C | -4.756082 | 0.550694  | 3.450912  | C | -1.725555  | -0.653911 | -0.393948 |
| C | -4.901919 | 3.002823  | -0.708919 | C | -1.731515  | 4.872131  | -1.79634  |
| C | -5.065123 | -0.966389 | -2.858213 | C | -1.814646  | 3.995304  | 0.845386  |
| C | -5.169026 | 1.363484  | -2.534298 | C | -1.907727  | 5.796971  | -0.763891 |
| C | -5.630928 | -2.929075 | 0.712265  | C | -1.948043  | 5.355482  | 0.558382  |
| C | -5.729888 | -2.7338   | -0.725402 | C | -2.122407  | -1.572826 | -2.738931 |
| C | -5.861044 | 2.224057  | 1.428239  | C | -2.191901  | -1.736946 | -1.346944 |
| C | -5.890977 | -1.299798 | 2.546656  | C | -2.54376   | -2.589555 | -3.594992 |
| C | -5.955249 | 0.140872  | 2.746734  | C | -2.691392  | -2.940466 | -0.836809 |
| C | -5.96008  | 2.419221  | -0.009443 | C | -3.036758  | -3.78915  | -3.073998 |
| C | -6.205143 | -0.681088 | -2.008972 | C | -3.10891   | -3.962682 | -1.692296 |
| C | -6.269583 | 0.759576  | -1.808872 | C | -3.656354  | 0.84807   | -0.657786 |
| C | -6.37116  | -1.861931 | 1.36173   | C | -4.307515  | 1.106275  | -2.039256 |
| C | -6.49705  | 0.959957  | 1.753737  | C | -5.797175  | 1.218607  | -1.913727 |
| C | -6.531869 | -1.546388 | -0.962505 | C | -6.688203  | 0.226998  | -2.341024 |
| C | -6.657711 | 1.275569  | -0.5704   | C | -9.846422  | -0.373195 | 1.030888  |
| C | -6.929191 | -1.007438 | 0.32711   | C | -10.088228 | -1.012621 | 2.246643  |
| C | -6.990942 | 0.373771  | 0.519035  | C | -10.827828 | -0.325842 | 0.039627  |

|   |           |           |           |   |            |           |           |
|---|-----------|-----------|-----------|---|------------|-----------|-----------|
| C | 10.992498 | 0.417374  | 1.30902   | C | -11.326373 | -1.614686 | 2.46344   |
| C | 11.025939 | -1.942408 | 0.827091  | C | -12.059992 | -0.931051 | 0.274163  |
| C | 11.720196 | -0.773803 | 1.166454  | C | -12.329874 | -1.583855 | 1.485853  |
| C | 13.21141  | -0.799149 | 1.404551  | C | -13.68077  | -2.208804 | 1.74194   |
| H | 1.843286  | 2.204504  | -2.489693 | H | -1.451019  | 2.796845  | -2.308481 |
| H | 2.025399  | 4.54726   | -3.281988 | H | -1.701145  | 5.208873  | -2.829268 |
| H | 2.100051  | 1.275149  | 1.166062  | H | -1.737731  | -0.642548 | -3.14429  |
| H | 2.188454  | -1.245651 | 0.833182  | H | -1.820735  | 1.450179  | 1.196492  |
| H | 2.195162  | -1.121335 | -2.924166 | H | -1.857196  | 3.655302  | 1.877559  |
| H | 2.234142  | 3.540512  | 1.569431  | H | -2.017499  | 6.853961  | -0.990626 |
| H | 2.303174  | 6.399746  | -1.642555 | H | -2.092035  | 6.065688  | 1.367959  |
| H | 2.423943  | 5.88177   | 0.789716  | H | -2.095013  | -0.922377 | 0.613589  |
| H | 2.452819  | -3.546559 | 0.6074    | H | -2.483792  | -2.44714  | -4.670865 |
| H | 2.772993  | -3.090039 | -4.320177 | H | -2.758681  | -3.078227 | 0.2398    |
| H | 3.018426  | -5.517462 | -0.777316 | H | -3.364276  | -4.580911 | -3.742299 |
| H | 3.17865   | -5.298501 | -3.250428 | H | -3.496477  | -4.888666 | -1.276594 |
| H | 4.141622  | 0.367007  | 0.706898  | H | -3.902243  | 1.688624  | -0.003028 |
| H | 4.270454  | -0.821847 | -0.573391 | H | -3.920693  | 2.053269  | -2.432716 |
| H | 4.475614  | 1.179079  | -2.262338 | H | -4.049228  | 0.30681   | -2.73492  |
| H | 4.96902   | 4.38145   | -1.289811 | H | -4.106984  | -0.046713 | -0.209398 |
| H | 5.339675  | 3.32914   | -2.671392 | H | -6.28619   | -0.53437  | -3.00395  |
| H | 5.877155  | 1.667393  | 0.964627  | H | -7.002112  | -0.340463 | -1.139488 |
| H | 5.993266  | 0.499386  | -1.169267 | H | -7.138955  | 2.146901  | -0.901697 |
| H | 6.633615  | 3.835376  | -1.537781 | H | -7.708799  | 0.543638  | -2.556054 |
| H | 9.055131  | 1.368188  | 1.24615   | H | -9.317897  | -1.02545  | 3.010201  |
| H | 9.106181  | -2.839177 | 0.382791  | H | -10.632261 | 0.192146  | -0.893106 |
| H | 11.513927 | 1.333929  | 1.574773  | H | -11.517136 | -2.113836 | 3.410416  |
| H | 11.572491 | -2.875464 | 0.713429  | H | -12.827596 | -0.892729 | -0.495202 |
| H | 13.438    | -0.935586 | 2.470371  | H | -13.611848 | -3.032787 | 2.459497  |

|           |           |           |           |           |            |           |           |
|-----------|-----------|-----------|-----------|-----------|------------|-----------|-----------|
| H         | 13.683759 | 0.137739  | 1.090505  | H         | -14.12477  | -2.596895 | 0.819156  |
| H         | 13.690195 | -1.620481 | 0.861817  | H         | -14.383022 | -1.473135 | 2.156179  |
| N         | 2.494053  | 0.24772   | -0.635899 | N         | -2.190744  | 0.693008  | -0.744368 |
| O         | 5.711921  | 2.543686  | 0.488244  | O         | -6.18527   | 2.262955  | -1.223728 |
| O         | 6.603985  | 0.289078  | 1.456482  | O         | -7.434724  | -0.7367   | -0.011856 |
| O         | 6.675592  | -2.080057 | 0.61959   | O         | -7.638771  | 0.667228  | 2.04199   |
| O         | 7.06642   | -0.151858 | -0.945133 | O         | -8.473798  | 1.510473  | -0.188719 |
| S         | 7.184501  | -0.711595 | 0.499033  | S         | -8.239529  | 0.355798  | 0.744144  |
|           |           |           |           |           |            |           |           |
|           |           |           |           |           |            |           |           |
| <b>G1</b> |           |           |           | <b>I1</b> |            |           |           |
| C         | 0.40052   | -3.032634 | 1.189708  | C         | 0.408571   | -3.011658 | 1.241344  |
| C         | 0.400908  | 3.032674  | 1.189773  | C         | 0.450983   | 3.051722  | 1.172846  |
| C         | 0.406733  | -0.000002 | 3.264882  | C         | 0.47211    | 0.043417  | 3.282123  |
| C         | 0.575222  | -2.313022 | 2.42744   | C         | 0.609932   | -2.279777 | 2.467699  |
| C         | 0.575518  | 2.313014  | 2.42749   | C         | 0.64224    | 2.345413  | 2.415771  |
| C         | 1.028637  | -3.034772 | -1.589293 | C         | 0.987744   | -3.050206 | -1.547636 |
| C         | 1.029026  | 3.034793  | -1.589226 | C         | 1.030811   | 3.017657  | -1.616449 |
| C         | 1.119316  | -1.176272 | -3.186742 | C         | 1.063775   | -1.211248 | -3.167841 |
| C         | 1.119467  | 1.176315  | -3.186717 | C         | 1.080566   | 1.141148  | -3.194569 |
| C         | 1.70593   | -3.487571 | 0.738472  | C         | 1.662986   | -2.346148 | -2.6102   |
| C         | 1.706376  | 3.487455  | 0.738547  | C         | 1.695704   | 2.279897  | -2.662642 |
| C         | 1.716941  | -2.313385 | -2.631742 | C         | 1.702466   | -3.481637 | 0.773017  |
| C         | 1.717237  | 2.31334   | -2.631691 | C         | 1.751555   | 3.491828  | 0.693682  |
| C         | 1.762801  | -0.000093 | 3.592687  | C         | 1.833657   | 0.037079  | 3.586244  |
| C         | 1.924631  | -0.000027 | -3.461646 | C         | 1.872469   | -0.043983 | -3.470171 |
| C         | 1.989617  | -2.310784 | 2.752691  | C         | 1.986278   | -3.501048 | -0.591759 |
| C         | 1.989913  | 2.310588  | 2.752741  | C         | 2.029633   | -2.284615 | 2.768721  |
| C         | 2.013677  | -3.489433 | -0.621316 | C         | 2.035672   | 3.476322  | -0.671123 |

|   |           |           |           |   |           |           |           |
|---|-----------|-----------|-----------|---|-----------|-----------|-----------|
| C | 2.014125  | 3.489307  | -0.62124  | C | 2.062129  | 2.336336  | 2.716179  |
| C | 2.572857  | -1.177294 | 3.32299   | C | 2.630584  | -1.148951 | 3.315769  |
| C | 2.573007  | 1.177011  | 3.323015  | C | 2.647266  | 1.205143  | 3.289102  |
| C | 2.690969  | -3.038758 | 1.707187  | C | 2.707384  | -3.029389 | 1.719483  |
| C | 2.691358  | 3.038494  | 1.707253  | C | 2.750181  | 3.047018  | 1.650202  |
| C | 3.134241  | -2.311253 | -2.318039 | C | 3.085549  | -2.350734 | -2.321066 |
| C | 3.134538  | 2.31102   | -2.317989 | C | 3.118169  | 2.271083  | -2.373552 |
| C | 3.289459  | -0.000117 | -3.173677 | C | 3.241992  | -0.050556 | -3.205529 |
| C | 3.318688  | -3.039358 | -1.072758 | C | 3.286438  | -3.065946 | -1.070908 |
| C | 3.319078  | 3.039075  | -1.072692 | C | 3.329427  | 3.011844  | -1.140051 |
| C | 3.877077  | -0.728177 | 2.876254  | C | 3.85986   | -1.225499 | -2.611317 |
| C | 3.87717   | 0.727737  | 2.876269  | C | 3.876514  | 1.128783  | -2.638203 |
| C | 3.905415  | -1.177427 | -2.582183 | C | 3.929893  | -0.714391 | 2.841296  |
| C | 3.905566  | 1.177101  | -2.582157 | C | 3.940185  | 0.741385  | 2.824763  |
| C | 3.945562  | -2.604151 | 1.274997  | C | 3.957216  | -2.608779 | 1.260584  |
| C | 3.945896  | 2.603737  | 1.275054  | C | 3.993923  | 2.598484  | 1.201264  |
| C | 4.265713  | -2.604115 | -0.143499 | C | 4.252507  | -2.627047 | -0.163187 |
| C | 4.266047  | 2.60369   | -0.143443 | C | 4.289347  | 2.580185  | -0.22247  |
| C | 4.550594  | -1.426154 | 1.871306  | C | 4.580861  | -1.428571 | 1.832867  |
| C | 4.550776  | 1.425649  | 1.871337  | C | 4.601003  | 1.423001  | 1.800391  |
| C | 4.891263  | -0.728148 | -1.618794 | C | 4.86555   | -0.772503 | -1.670447 |
| C | 4.891356  | 0.727675  | -1.618778 | C | 4.875801  | 0.683199  | -1.68702  |
| C | 5.067699  | -1.426118 | -0.422053 | C | 5.057847  | -1.458164 | -0.469028 |
| C | 5.067882  | 1.425596  | -0.422022 | C | 5.077886  | 1.393254  | -0.501498 |
| C | 5.24529   | -0.698193 | 0.823171  | C | 5.262257  | -0.717531 | 0.764555  |
| C | 5.245379  | 0.697621  | 0.823186  | C | 5.27203   | 0.678146  | 0.748652  |
| C | -0.186724 | 0.740673  | -2.741421 | C | -0.138892 | 1.216872  | 2.685208  |
| C | -0.186819 | -0.740472 | -2.741437 | C | -0.154919 | -1.134353 | 2.711186  |
| C | -0.202019 | 1.175865  | 2.670434  | C | -0.214003 | 2.577119  | -1.153417 |

|   |           |           |           |   |           |           |           |
|---|-----------|-----------|-----------|---|-----------|-----------|-----------|
| C | -0.20217  | -1.175779 | 2.670409  | C | -0.220389 | 0.719689  | -2.72138  |
| C | -0.220832 | 2.580851  | -1.153477 | C | -0.231324 | -0.76103  | -2.704833 |
| C | -0.221163 | -2.580681 | -1.153534 | C | -0.25121  | -2.582159 | -1.095755 |
| C | -0.540913 | 2.577964  | 0.261026  | C | -0.510131 | 2.593035  | 0.266078  |
| C | -0.541241 | -2.577782 | 0.260969  | C | -0.545644 | -2.560089 | 0.323927  |
| C | -0.852414 | 1.439816  | -1.757233 | C | -0.862855 | 1.433476  | -1.732645 |
| C | -0.852599 | -1.43955  | -1.757264 | C | -0.88544  | -1.443841 | -1.701633 |
| C | -1.190104 | 0.740332  | 1.707264  | C | -1.147178 | 0.777852  | 1.744674  |
| C | -1.190199 | -0.740098 | 1.707248  | C | -1.156323 | -0.702072 | 1.760305  |
| C | -1.373496 | 1.436764  | 0.53374   | C | -1.346556 | 1.461532  | 0.5665    |
| C | -1.373677 | -1.43648  | 0.533708  | C | -1.365343 | -1.409898 | 0.597882  |
| C | -1.849338 | 0.805985  | -0.782165 | C | -1.848568 | 0.817447  | -0.734077 |
| C | -1.849437 | -0.805613 | -0.782182 | C | -1.861878 | -0.790541 | -0.716627 |
| C | -3.342624 | 1.149243  | -1.16236  | C | -3.340808 | 1.173741  | -1.100308 |
| C | -3.342778 | -1.148659 | -1.162396 | C | -3.36288  | -1.130601 | -1.077937 |
| C | -3.83008  | 2.531927  | -0.778188 | C | -3.786085 | 3.574106  | -1.660004 |
| C | -3.83041  | -2.531321 | -0.778365 | C | -3.798971 | 2.560103  | -0.691934 |
| C | -3.86064  | 3.519896  | -1.772802 | C | -3.829234 | -2.5133   | -0.66399  |
| C | -3.86134  | -3.519106 | -1.773155 | C | -3.958521 | -3.493162 | -1.657109 |
| C | -4.218194 | 2.879661  | 0.52424   | C | -4.084232 | -2.874399 | 0.668809  |
| C | -4.218316 | -2.87923  | 0.524074  | C | -4.148698 | 4.882029  | -1.336285 |
| C | -4.257444 | 4.8251    | -1.480151 | C | -4.198186 | 2.882682  | 0.613792  |
| C | -4.258313 | -4.824292 | -1.480667 | C | -4.330063 | -4.800373 | -1.336924 |
| C | -4.623511 | 4.182678  | 0.814769  | C | -4.464541 | -4.177323 | 0.988799  |
| C | -4.623799 | -4.182232 | 0.814447  | C | -4.544241 | 5.192282  | -0.03515  |
| C | -4.641596 | 5.160018  | -0.181848 | C | -4.572724 | 4.187867  | 0.934062  |
| C | -4.64226  | -5.159383 | -0.182346 | C | -4.584575 | -5.145955 | -0.010512 |
| C | -5.545013 | 0.000434  | -1.004951 | C | -5.541239 | 0.07909   | -1.013557 |
| C | -6.226521 | -0.000399 | 1.471135  | C | -6.524427 | -0.021454 | 1.352879  |

|             |           |           |           |             |           |           |           |
|-------------|-----------|-----------|-----------|-------------|-----------|-----------|-----------|
| C           | -6.50733  | -0.000315 | 0.15693   | C           | -6.534333 | -0.595934 | -0.047343 |
| C           | -7.262913 | -0.001082 | 2.555401  | C           | -7.619097 | 0.383499  | 2.005079  |
| H           | -3.383589 | 1.098174  | -2.265472 | H           | -3.391418 | 1.13384   | -2.203597 |
| H           | -3.383724 | -1.097504 | -2.265505 | H           | -3.41385  | -1.100751 | -2.181432 |
| H           | -3.567462 | 3.264103  | -2.788553 | H           | -3.485634 | 3.337152  | -2.678178 |
| H           | -3.568318 | -3.263174 | -2.788917 | H           | -3.763079 | -3.230955 | -2.694378 |
| H           | -4.218685 | -2.13803  | 1.314889  | H           | -4.018856 | -2.135497 | 1.45919   |
| H           | -4.218863 | 2.138315  | 1.314919  | H           | -4.128938 | 5.65268   | -2.102097 |
| H           | -4.27149  | 5.574269  | -2.267131 | H           | -4.242915 | 2.117321  | 1.380036  |
| H           | -4.272646 | -5.573318 | -2.267779 | H           | -4.42373  | -5.542692 | -2.124861 |
| H           | -4.355171 | 0.000244  | 1.198844  | H           | -4.618616 | -0.011686 | 1.247853  |
| H           | -4.927252 | 4.432598  | 1.827756  | H           | -4.668468 | -4.434147 | 2.024601  |
| H           | -4.927374 | -4.432285 | 1.82745   | H           | -4.834653 | 6.207632  | 0.220858  |
| H           | -4.956963 | 6.173468  | 0.051352  | H           | -4.878381 | -6.160547 | 0.244361  |
| H           | -4.957753 | -6.172823 | 0.050726  | H           | -4.889911 | 4.416996  | 1.947627  |
| H           | -5.738545 | -0.876077 | -1.639679 | H           | -5.633873 | -0.368074 | -2.01674  |
| H           | -5.73863  | 0.877707  | -1.638586 | H           | -5.814354 | 1.133811  | -1.101799 |
| H           | -7.142798 | -0.882862 | 3.197065  | H           | -6.325976 | -1.670132 | 0.001658  |
| H           | -7.143176 | 0.880231  | 3.197771  | H           | -7.537415 | -0.484411 | -0.472538 |
| H           | -7.556195 | -0.000717 | -0.127684 | H           | -7.554975 | 0.762679  | 3.019456  |
| H           | -8.274515 | -0.001139 | 2.141891  | H           | -8.596844 | 0.3196    | 1.542082  |
| N           | -4.100332 | 0.00033   | -0.623071 | N           | -4.121389 | 0.033536  | -0.56586  |
| O           | -4.956753 | 0.000039  | 1.987063  | O           | -5.295129 | 0.015377  | 1.96538   |
|             |           |           |           |             |           |           |           |
|             |           |           |           |             |           |           |           |
| <b>TS2a</b> |           |           |           | <b>TS2b</b> |           |           |           |
| C           | 0.294966  | 1.729703  | 0.113989  | C           | 0.720401  | 0.798803  | 0.910021  |
| C           | 1.348414  | 2.23772   | 1.124239  | C           | 1.845608  | -3.158907 | 4.145892  |
| C           | 1.759247  | -1.507873 | 4.364071  | C           | 1.90908   | -2.885513 | 2.777131  |

|   |          |           |           |   |          |           |           |
|---|----------|-----------|-----------|---|----------|-----------|-----------|
| C | 2.016931 | -1.177438 | 3.031118  | C | 2.032578 | 1.612326  | 2.367324  |
| C | 2.123041 | -0.63033  | 5.385014  | C | 2.508317 | -2.327806 | 5.048151  |
| C | 2.652746 | 0.025981  | 2.70355   | C | 2.534586 | 4.269533  | -1.197424 |
| C | 2.746023 | 0.579662  | 5.067055  | C | 2.63176  | -1.787677 | 2.311514  |
| C | 2.955826 | 0.345686  | 1.253624  | C | 2.633337 | 5.581165  | -0.723594 |
| C | 3.006641 | 3.635086  | -2.278515 | C | 3.065553 | 3.212453  | -0.458104 |
| C | 3.012557 | 0.904354  | 3.737849  | C | 3.226863 | -1.225332 | 4.581947  |
| C | 3.027493 | 4.947801  | -2.756456 | C | 3.267017 | 5.830113  | 0.493204  |
| C | 3.253957 | 1.920686  | -0.448183 | C | 3.29993  | -0.940371 | 3.211281  |
| C | 3.271274 | 3.356648  | -0.930762 | C | 3.703083 | 3.450829  | 0.770962  |
| C | 3.305424 | 6.001974  | -1.884645 | C | 3.793996 | 4.770602  | 1.234505  |
| C | 3.562257 | 4.421813  | -0.067125 | C | 4.098886 | 0.266306  | 2.771612  |
| C | 3.57316  | 5.734153  | -0.539756 | C | 4.292311 | 2.346445  | 1.620577  |
| C | 4.45384  | 0.112316  | 0.795011  | C | 5.062217 | -1.097238 | -0.473269 |
| C | 4.659989 | 1.199805  | -0.374497 | C | 5.181822 | 0.193625  | -1.186901 |
| C | 4.681194 | -1.339962 | 0.357947  | C | 5.257776 | -1.163632 | 0.888492  |
| C | 4.796671 | -1.739761 | -0.956269 | C | 5.340444 | 0.061321  | 1.814218  |
| C | 4.98553  | -0.739379 | -2.031955 | C | 5.471942 | 1.473291  | 1.033322  |
| C | 5.048719 | 0.605028  | -1.733409 | C | 5.489851 | 1.346619  | -0.499137 |
| C | 5.386325 | -2.062995 | 1.380307  | C | 5.593417 | -2.125974 | -1.341916 |
| C | 5.479673 | 0.211138  | 1.93402   | C | 5.78338  | -0.075013 | -2.475769 |
| C | 5.590104 | -2.901175 | -1.297533 | C | 6.036409 | -1.50058  | -2.574228 |
| C | 5.843351 | 2.153903  | -0.151941 | C | 6.038114 | -2.243901 | 1.431939  |
| C | 5.880328 | -1.105811 | 2.351823  | C | 6.313031 | -3.200367 | -0.809953 |
| C | 5.889416 | -1.312029 | -3.006414 | C | 6.454875 | 2.257631  | -1.056237 |
| C | 6.043378 | 1.424076  | -2.369505 | C | 6.541365 | -3.259574 | 0.613099  |
| C | 6.137822 | -3.202893 | 1.074169  | C | 6.576019 | -0.319048 | 2.644756  |
| C | 6.242875 | -3.632457 | -0.299074 | C | 6.686551 | 0.831911  | -3.038825 |
| C | 6.262575 | -2.641423 | -2.557782 | C | 6.809301 | 2.197009  | 1.253896  |

|   |          |           |           |   |           |           |           |
|---|----------|-----------|-----------|---|-----------|-----------|-----------|
| C | 6.351619 | 1.262543  | 2.105261  | C | 6.84787   | -1.723234 | 2.516364  |
| C | 6.535506 | 2.377698  | -1.393375 | C | 7.031083  | 2.027856  | -2.309596 |
| C | 6.539217 | 2.263201  | 1.030952  | C | 7.178191  | -1.9664   | -3.225609 |
| C | 6.831129 | -0.508371 | -3.65848  | C | 7.265304  | 2.783917  | 0.025116  |
| C | 6.909462 | 0.894681  | -3.332571 | C | 7.507251  | -3.681451 | -1.479785 |
| C | 7.107607 | -1.326571 | 2.985021  | C | 7.606379  | 0.549036  | 2.932348  |
| C | 7.421223 | -3.422801 | 1.721221  | C | 7.726176  | 1.840375  | 2.218253  |
| C | 7.556098 | -3.116341 | -2.773067 | C | 7.879325  | -3.782657 | 0.838448  |
| C | 7.593214 | -4.11868  | -0.516681 | C | 7.880821  | 0.351163  | -3.70895  |
| C | 7.637541 | 1.052481  | 2.734853  | C | 7.933151  | -3.074902 | -2.663018 |
| C | 7.878254 | 2.76851   | -1.418822 | C | 8.123502  | -1.020889 | -3.798119 |
| C | 7.895679 | -2.503603 | 2.655602  | C | 8.130537  | -2.234082 | 2.740646  |
| C | 7.936327 | 2.64133   | 1.027342  | C | 8.442975  | 2.301767  | -2.524845 |
| C | 8.010064 | -0.218947 | 3.18279   | C | 8.477886  | -4.041995 | -0.459137 |
| C | 8.181012 | -0.996448 | -3.87482  | C | 8.620835  | 3.058081  | -0.184675 |
| C | 8.238021 | -3.86443  | -1.728717 | C | 8.657601  | -3.280475 | 1.87985   |
| C | 8.308497 | 1.290073  | -3.34771  | C | 8.945351  | 0.04333   | 3.146069  |
| C | 8.323299 | -3.989218 | 0.734096  | C | 8.969158  | 1.26108   | -3.390459 |
| C | 8.537305 | -2.274067 | -3.438914 | C | 9.135614  | 2.095606  | 2.011686  |
| C | 8.598    | 2.904674  | -0.176409 | C | 9.205886  | -1.328491 | 3.063653  |
| C | 8.613818 | 1.89982   | 2.075145  | C | 9.221473  | 2.80573   | -1.484445 |
| C | 8.782109 | 2.206214  | -2.409966 | C | 9.341915  | -2.808743 | -2.877367 |
| C | 9.096331 | 0.116932  | -3.682487 | C | 9.459586  | -1.538841 | -3.579255 |
| C | 9.294308 | -2.112291 | 2.647355  | C | 9.579614  | 2.705467  | 0.833742  |
| C | 9.364288 | -0.697023 | 2.973523  | C | 9.833797  | -3.780755 | -0.663639 |
| C | 9.634692 | -3.476279 | -1.742157 | C | 9.887585  | 0.992193  | 2.581124  |
| C | 9.666983 | -3.610182 | 0.720957  | C | -0.45975  | 1.456077  | 1.20054   |
| C | 9.819749 | -2.493069 | -2.799623 | C | -0.924921 | 2.696914  | 0.511482  |
| C | 9.919449 | 1.447766  | 1.883582  | C | -1.083991 | -2.197752 | -2.421852 |



|   |           |           |           |   |           |           |           |
|---|-----------|-----------|-----------|---|-----------|-----------|-----------|
| C | 9.95198   | 2.424704  | -0.383782 | C | -1.154023 | -1.763395 | -3.745708 |
| C | -0.160447 | 2.591023  | -0.87628  | C | -1.720397 | -1.470679 | -1.413699 |
| C | -0.598118 | 2.17538   | -2.249755 | C | -1.771535 | 2.501907  | -0.80592  |
| C | -0.799986 | -3.487191 | 0.745557  | C | -1.867388 | -0.602767 | -4.055877 |
| C | -0.911817 | -3.724407 | 2.116049  | C | -2.445447 | -0.311527 | -1.715261 |
| C | -1.284451 | 1.388589  | 1.458143  | C | -2.512794 | 0.115528  | -3.049899 |
| C | -1.377802 | -2.345357 | 0.186889  | C | -3.15653  | 0.434357  | -0.604691 |
| C | -1.599963 | -2.815402 | 2.92437   | C | -4.007635 | 2.435858  | 0.266054  |
| C | -2.081302 | -1.435794 | 0.986727  | C | -4.235094 | 3.929671  | 0.153006  |
| C | -2.184408 | -1.680097 | 2.365107  | C | -4.323867 | 4.709634  | 1.312244  |
| C | -2.747272 | -0.246892 | 0.331822  | C | -4.383363 | 4.553112  | -1.095013 |
| C | -3.432369 | 2.046991  | 0.456857  | C | -4.562396 | 6.083352  | 1.233087  |
| C | -3.497676 | 4.554421  | 0.58084   | C | -4.61203  | 5.926094  | -1.175808 |
| C | -3.511709 | 3.328406  | 1.256382  | C | -4.704352 | 6.69479   | -0.012526 |
| C | -3.608344 | 5.756331  | 1.281747  | C | -4.709619 | 0.148923  | -0.471477 |
| C | -3.630837 | 3.325178  | 2.654852  | C | -4.968851 | -1.086759 | 0.398785  |
| C | -3.718691 | 5.743853  | 2.672173  | C | -5.292962 | 1.522289  | 0.132433  |
| C | -3.726716 | 4.526062  | 3.356682  | C | -5.319863 | -2.211104 | -0.424077 |
| C | -4.319836 | -0.299269 | 0.17512   | C | -5.380688 | -0.300289 | -1.778318 |
| C | -4.692962 | -1.006152 | -1.13627  | C | -5.42083  | -1.03179  | 1.699843  |
| C | -4.780634 | 1.244443  | 0.255142  | C | -5.57657  | -1.725628 | -1.766606 |
| C | -5.023544 | -1.221859 | 1.184946  | C | -5.955785 | 0.232441  | 2.256168  |
| C | -5.138298 | -2.345181 | -0.86884  | C | -6.008878 | 1.370914  | 1.480312  |
| C | -5.144725 | -0.350394 | -2.260897 | C | -6.061453 | -3.280692 | 0.089603  |
| C | -5.344527 | -2.477683 | 0.560674  | C | -6.211158 | -2.115681 | 2.242913  |
| C | -5.515423 | 1.753845  | -0.993703 | C | -6.229364 | 0.485484  | -2.525079 |
| C | -5.567329 | 1.067094  | -2.187621 | C | -6.420171 | 2.152446  | -0.699141 |
| C | -5.797364 | -0.776418 | 2.232697  | C | -6.519187 | -3.231472 | 1.456854  |
| C | -5.845197 | 1.532735  | 1.327469  | C | -6.565828 | -2.331352 | -2.547948 |

|   |           |           |           |   |           |           |           |
|---|-----------|-----------|-----------|---|-----------|-----------|-----------|
| C | -5.975538 | -3.019115 | -1.764202 | C | -6.764609 | 1.748427  | -1.96914  |
| C | -6.029958 | -1.022028 | -3.1881   | C | -7.061118 | -0.107603 | 3.126746  |
| C | -6.219852 | 0.640142  | 2.306064  | C | -7.100278 | -3.899001 | -0.718159 |
| C | -6.381761 | -3.282818 | 1.041462  | C | -7.185339 | 2.195397  | 1.514722  |
| C | -6.432934 | -2.340848 | -2.952488 | C | -7.220231 | -1.550649 | 3.120495  |
| C | -6.61275  | 2.599283  | -0.613277 | C | -7.276552 | -0.117868 | -3.3212   |
| C | -6.70165  | 1.230079  | -3.071804 | C | -7.347297 | -3.43306  | -2.00854  |
| C | -6.817558 | 2.461443  | 0.816049  | C | -7.4386   | -1.506732 | -3.346988 |
| C | -6.889753 | -1.583361 | 2.732295  | C | -7.440148 | 2.675714  | 0.169957  |
| C | -6.988112 | -0.052757 | -3.688253 | C | -7.847317 | -3.815097 | 1.50842   |
| C | -7.061729 | -3.845136 | -1.262748 | C | -8.12639  | 1.889113  | -2.438297 |
| C | -7.174418 | -2.825225 | 2.1563    | C | -8.190262 | 0.716005  | 3.193471  |
| C | -7.260517 | -3.973314 | 0.110759  | C | -8.207648 | -4.228583 | 0.161704  |
| C | -7.561044 | 0.66723   | 2.848778  | C | -8.253516 | 1.897357  | 2.367785  |
| C | -7.707293 | 2.786909  | -1.4641   | C | -8.443688 | 0.743475  | -3.270848 |
| C | -7.753079 | 2.084769  | -2.723567 | C | -8.493947 | -2.1157   | 3.179222  |
| C | -7.807779 | -2.737697 | -3.196283 | C | -8.712959 | -3.279492 | -2.478548 |
| C | -7.975196 | -0.698406 | 3.112925  | C | -8.756626 | 2.843269  | -0.271225 |
| C | -8.112302 | 2.51873   | 1.341243  | C | -8.768811 | -2.085876 | -3.307089 |
| C | -8.197583 | -3.669122 | -2.15013  | C | -8.81632  | -3.26723  | 2.351283  |
| C | -8.307316 | -0.433653 | -3.930939 | C | -9.109646 | 2.440367  | -1.610402 |
| C | -8.494243 | 1.599652  | 2.385237  | C | -9.5176   | 0.130562  | 3.244244  |
| C | -8.550822 | -3.223608 | 1.925987  | C | -9.521183 | -4.076177 | -0.286229 |
| C | -8.604805 | -3.934882 | 0.659115  | C | -9.621674 | 2.057068  | 1.902402  |
| C | -8.727396 | -1.80218  | -3.673706 | C | -9.66699  | -1.257596 | 3.235393  |
| C | -9.053785 | 2.833407  | -0.91764  | C | -9.72379  | 0.190133  | -3.24482  |
| C | -9.127613 | 1.687041  | -2.967534 | C | -9.778904 | -3.592586 | -1.633136 |
| C | -9.251355 | 2.701085  | 0.455645  | C | -9.867    | 2.518793  | 0.610218  |
| C | -9.299105 | -1.082409 | 2.902116  | C | -9.889406 | -1.254583 | -3.255316 |

|   |            |           |           |   |            |           |           |
|---|------------|-----------|-----------|---|------------|-----------|-----------|
| C | -9.399515  | 0.451215  | -3.557098 | C | 10.069434  | -3.012535 | 1.670653  |
| C | -9.490097  | -3.625853 | -1.624583 | C | 10.254517  | 0.761378  | -3.174148 |
| C | -9.592708  | -2.36829  | 2.289369  | C | 10.274353  | -3.152821 | -1.896757 |
| C | -9.69779   | -3.761738 | -0.191765 | C | 10.408401  | -1.803692 | 2.40389   |
| C | -9.870624  | 1.200774  | 2.154837  | C | 10.504761  | -0.665777 | -3.27135  |
| C | -9.933401  | 2.150212  | -1.849494 | C | 10.56084   | 2.291015  | -1.260895 |
| C | 10.066872  | 1.9923    | -1.767292 | C | 10.645513  | -3.255561 | 0.422536  |
| C | 10.1624    | -2.653204 | 1.697279  | C | 10.782048  | 2.229042  | 0.174733  |
| C | 10.300333  | 0.118932  | 2.335245  | C | 11.047903  | 0.538664  | 1.95505   |
| C | 10.329075  | -0.093417 | -3.061687 | C | 11.066338  | 1.286584  | -2.088091 |
| C | 10.335711  | -3.349603 | -0.541284 | C | 11.310539  | -0.888596 | 1.858408  |
| C | 10.599587  | 1.708921  | 0.624979  | C | 11.358337  | -2.240734 | -1.574353 |
| C | 10.698155  | -1.423966 | -2.612394 | C | 11.471247  | -1.023488 | -2.247251 |
| C | 10.824294  | 0.863477  | -2.085169 | C | 11.50071   | 1.165239  | 0.72303   |
| C | 11.137171  | -1.802832 | 1.037167  | C | 11.586336  | -2.303808 | -0.14069  |
| C | 11.204531  | -0.44402  | 1.351684  | C | 11.816847  | 0.183346  | -1.515484 |
| C | 11.24545   | -2.233369 | -0.346195 | C | 11.913163  | -1.144247 | 0.564978  |
| C | 11.38957   | 0.53915   | 0.294152  | C | 12.030717  | 0.125588  | -0.136977 |
| C | 11.422964  | -1.290871 | -1.359949 | C | -10.181269 | -3.114416 | 1.887582  |
| C | 11.499524  | 0.122921  | -1.034123 | C | -10.404344 | 0.960558  | 2.44483   |
| C | -10.071292 | -1.761543 | -3.132023 | C | -10.43886  | 1.858928  | -1.571386 |
| C | -10.264843 | -0.11481  | 2.40577   | C | -10.527379 | -3.509126 | 0.59374   |
| C | -10.340177 | 1.882836  | 0.959779  | C | -10.707328 | -1.872075 | 2.434425  |
| C | -10.44558  | -2.654161 | -2.125807 | C | -10.739949 | 0.754795  | -2.371098 |
| C | -10.486833 | -0.368337 | -3.059973 | C | -10.908897 | 1.907603  | -0.196248 |
| C | -10.730033 | -2.192533 | 1.407858  | C | -10.944565 | -2.727807 | -1.583695 |
| C | -10.78172  | -2.874004 | 0.190306  | C | -10.997917 | -1.582333 | -2.38035  |
| C | -10.976513 | 1.357864  | -1.36701  | C | -11.402561 | 0.367977  | 1.66918   |
| C | -11.145564 | -0.799246 | 1.479814  | C | -11.40844  | -2.676716 | -0.207824 |

|   |            |           |           |   |            |           |           |
|---|------------|-----------|-----------|---|------------|-----------|-----------|
| C | -11.184065 | 1.221741  | 0.065723  | C | -11.523828 | -0.339906 | -1.833594 |
| C | -11.245201 | -2.190143 | -1.004734 | C | -11.557576 | -1.075774 | 1.664534  |
| C | -11.259414 | 0.074626  | -1.984728 | C | -11.660276 | 0.851426  | 0.322228  |
| C | -11.595853 | -0.145327 | 0.331322  | C | -11.912653 | -1.485629 | 0.316324  |
| C | -11.643673 | -0.85458  | -0.935735 | C | -11.974852 | -0.294264 | -0.51291  |
| H | 0.157121   | 2.515392  | -2.972243 | H | 0.833603   | -0.221712 | 1.256784  |
| H | 0.402315   | 0.700439  | -0.220881 | H | 1.233904   | 1.070818  | -0.00376  |
| H | 1.08299    | 1.955657  | 2.146887  | H | 1.286812   | -4.018432 | 4.504253  |
| H | 1.274054   | -2.450583 | 4.600295  | H | 1.404091   | -3.535616 | 2.068443  |
| H | 1.361135   | 3.328946  | 1.08217   | H | 1.547116   | 1.039609  | 3.149782  |
| H | 1.729166   | -1.867028 | 2.240815  | H | 1.729682   | 2.643348  | 2.231622  |
| H | 1.924355   | -0.88548  | 6.422168  | H | 2.060469   | 4.070576  | -2.154596 |
| H | 2.347377   | -0.333691 | 0.627407  | H | 2.226669   | 6.402933  | -1.305771 |
| H | 2.66465    | 1.336182  | -1.179924 | H | 2.470168   | -2.534739 | 6.113483  |
| H | 2.811822   | 2.813393  | -2.965583 | H | 2.696929   | -1.605943 | 1.244143  |
| H | 2.83841    | 5.144243  | -3.808548 | H | 3.013499   | 2.204441  | -0.855085 |
| H | 3.032299   | 1.268407  | 5.857102  | H | 3.355793   | 6.845822  | 0.866891  |
| H | 3.323831   | 7.024229  | -2.251864 | H | 3.744282   | -0.584811 | 5.292316  |
| H | 3.503255   | 1.840884  | 3.492738  | H | 4.289917   | 4.974372  | 2.180523  |
| H | 3.781815   | 4.214454  | 0.975645  | H | 4.513969   | 0.721032  | 3.682006  |
| H | 3.79942    | 6.549327  | 0.141929  | H | 4.708821   | 2.822632  | 2.519207  |
| H | -0.268268  | -4.189188 | 0.11004   | H | -0.041366  | 3.265129  | 0.199451  |
| H | -0.401256  | 4.428555  | -1.381599 | H | -0.5347    | -3.101503 | -2.172434 |
| H | -0.468524  | -4.614762 | 2.552522  | H | -0.658402  | -2.325644 | -4.532078 |
| H | -0.680865  | 1.090617  | -2.337398 | H | -1.177807  | 1.928613  | -1.521405 |
| H | -0.703024  | 0.584565  | 1.896385  | H | -1.485877  | 3.331356  | 1.209333  |
| H | -1.215801  | 2.36926   | 1.91523   | H | -1.666131  | -1.814825 | -0.383068 |
| H | -1.298374  | -2.172373 | -0.88405  | H | -1.888752  | 3.513165  | -1.206317 |
| H | -1.553389  | 2.629595  | -2.536548 | H | -1.928269  | -0.26032  | -5.085199 |

|            |           |           |           |            |           |           |           |
|------------|-----------|-----------|-----------|------------|-----------|-----------|-----------|
| H          | -1.692236 | -2.995677 | 3.991333  | H          | -1.953514 | 1.533361  | 2.402526  |
| H          | -2.343646 | -0.156963 | -0.688323 | H          | -2.716425 | 0.100272  | 0.3512    |
| H          | -2.732    | -0.990062 | 2.999717  | H          | -3.074773 | 1.01155   | -3.294094 |
| H          | -3.074647 | 2.300712  | -0.552619 | H          | -3.629519 | 2.243704  | 1.295055  |
| H          | -3.41975  | 4.569298  | -0.504129 | H          | -4.223159 | 4.236765  | 2.287386  |
| H          | -3.605642 | 6.699014  | 0.742392  | H          | -4.323843 | 3.954427  | -1.998708 |
| H          | -3.65688  | 2.383658  | 3.195246  | H          | -4.637003 | 6.67209   | 2.143022  |
| H          | -3.800033 | 6.677385  | 3.221012  | H          | -4.725469 | 6.396092  | -2.148743 |
| H          | -3.816961 | 4.509998  | 4.438863  | H          | -4.888223 | 7.763356  | -0.078112 |
| N          | 2.701811  | 1.744312  | 0.894271  | N          | 3.315336  | 1.354606  | 2.134427  |
| N          | -2.485192 | 1.049931  | 0.989027  | N          | -3.084492 | 1.893582  | -0.721931 |
| O          | -0.177087 | 3.896562  | -0.598965 | O          | -1.161371 | 0.989104  | 2.241466  |
|            |           |           |           |            |           |           |           |
|            |           |           |           |            |           |           |           |
| <b>3aa</b> |           |           |           | <b>4aa</b> |           |           |           |
| C          | 0.103583  | 2.74534   | 0.874755  | C          | 0.110093  | -0.797547 | -3.80282  |
| C          | 0.161484  | -1.559804 | -2.227619 | C          | 0.467821  | -0.049009 | -4.924127 |
| C          | 0.593525  | -1.323633 | 0.51276   | C          | 0.514274  | 4.505712  | -0.813395 |
| C          | 0.847269  | 2.574203  | -0.480487 | C          | 0.597686  | -0.44354  | -2.543123 |
| C          | 0.858989  | 3.665416  | 1.838784  | C          | 0.657289  | 2.976663  | -0.670567 |
| C          | 1.011308  | -0.567676 | -1.738775 | C          | 1.312219  | 1.054686  | -4.778865 |
| C          | 1.049141  | 3.194923  | 3.26837   | C          | 1.452914  | 0.653757  | -2.389259 |
| C          | 1.239376  | -0.440765 | -0.36065  | C          | 1.803087  | 1.403314  | -3.521555 |
| C          | 2.202633  | 0.594718  | 0.18637   | C          | 1.990082  | 1.001159  | -1.014839 |
| C          | 3.310339  | 2.648074  | -0.057788 | C          | 2.785867  | 2.566553  | 0.514508  |
| C          | 3.430433  | 3.877922  | -2.282791 | C          | 3.077885  | 4.403357  | 2.216943  |
| C          | 3.576828  | 3.888796  | -0.88825  | C          | 3.195071  | 3.977754  | 0.88907   |
| C          | 3.715456  | 5.017466  | -3.033663 | C          | 3.433221  | -0.955402 | -0.203752 |
| C          | 3.732005  | 0.179567  | 0.112524  | C          | 3.452278  | 0.490001  | -0.713992 |

|   |          |           |           |   |          |           |           |
|---|----------|-----------|-----------|---|----------|-----------|-----------|
| C | 4.005026 | 5.06504   | -0.263526 | C | 3.481945 | 5.686029  | 2.595958  |
| C | 4.05708  | -0.84849  | -0.981557 | C | 3.610865 | -1.310504 | 1.115858  |
| C | 4.146762 | -0.619959 | 1.353274  | C | 3.726917 | 4.864562  | -0.059061 |
| C | 4.157429 | 6.182634  | -2.402351 | C | 3.852284 | -1.858217 | -1.239581 |
| C | 4.19711  | -2.159143 | -0.404608 | C | 4.002193 | 1.562496  | 0.346674  |
| C | 4.249515 | -2.018167 | 1.037877  | C | 4.006023 | 6.561215  | 1.645066  |
| C | 4.300294 | 6.203803  | -1.014961 | C | 4.119671 | -0.322651 | 2.093794  |
| C | 4.489641 | 1.58591   | -0.055791 | C | 4.124885 | 6.146518  | 0.315479  |
| C | 4.731095 | -0.557635 | -2.146265 | C | 4.185303 | -2.594849 | 1.453119  |
| C | 4.89638  | -0.104633 | 2.389012  | C | 4.336861 | 0.317297  | -1.958388 |
| C | 4.945791 | -3.159232 | -1.034254 | C | 4.383795 | -3.116293 | -0.934527 |
| C | 5.049129 | -2.878202 | 1.799317  | C | 4.413697 | -1.072843 | -2.321704 |
| C | 5.411791 | 1.661443  | -1.281455 | C | 4.417582 | 0.96339   | 1.696323  |
| C | 5.429298 | 0.737438  | -2.301628 | C | 4.555956 | -3.493818 | 0.446962  |
| C | 5.503339 | 1.893949  | 1.052087  | C | 4.99459  | -1.025313 | 3.007559  |
| C | 5.534751 | -1.567719 | -2.800572 | C | 5.036947 | -2.422856 | 2.616209  |
| C | 5.595007 | 1.19136   | 2.234333  | C | 5.325257 | 2.228819  | -0.060919 |
| C | 5.633187 | -2.856313 | -2.265361 | C | 5.379474 | 1.151825  | -2.292527 |
| C | 5.751887 | -0.971091 | 3.170967  | C | 5.48831  | -1.576491 | -3.062385 |
| C | 5.791434 | -4.040652 | -0.24503  | C | 5.512833 | -3.629747 | -1.692851 |
| C | 5.821081 | -2.340759 | 2.892964  | C | 5.625336 | 1.582699  | 2.169256  |
| C | 5.841718 | -3.904481 | 1.141537  | C | 5.795606 | -4.240586 | 0.55871   |
| C | 6.629413 | 2.349473  | -0.943904 | C | 5.889136 | 2.137131  | -1.31349  |
| C | 6.644714 | 0.490458  | -3.046993 | C | 6.053417 | -2.875382 | -2.733061 |
| C | 6.684452 | 2.495805  | 0.497725  | C | 6.147662 | -0.407521 | 3.504115  |
| C | 6.711924 | -0.925966 | -3.356428 | C | 6.186697 | 2.362792  | 1.083313  |
| C | 6.862482 | 1.0883    | 2.924662  | C | 6.222076 | -3.149284 | 2.732295  |
| C | 6.912234 | -3.541927 | -2.24947  | C | 6.388784 | -4.32549  | -0.766393 |
| C | 6.961847 | -0.240123 | 3.501988  | C | 6.470786 | 0.931014  | 3.074464  |

|   |           |           |           |   |          |           |           |
|---|-----------|-----------|-----------|---|----------|-----------|-----------|
| C | 7.010983  | -4.276469 | -0.998177 | C | 6.51532  | 0.647064  | -3.033502 |
| C | 7.100757  | -3.025404 | 2.92063   | C | 6.568365 | -0.69361  | -3.428805 |
| C | 7.114203  | -3.994115 | 1.836031  | C | 6.613289 | -4.071883 | 1.678112  |
| C | 7.808289  | 2.147883  | -1.669283 | C | 7.32446  | 2.21475   | -1.478954 |
| C | 7.817254  | 1.193116  | -2.750285 | C | 7.385911 | -1.157356 | 3.613031  |
| C | 7.913546  | 2.432443  | 1.163948  | C | 7.423513 | -2.500813 | 3.233678  |
| C | 7.93997   | -1.588465 | -3.356472 | C | 7.494169 | -2.786131 | -2.894736 |
| C | 8.005395  | 1.709232  | 2.408748  | C | 7.574669 | 2.467592  | 0.944577  |
| C | 8.043644  | -2.920779 | -2.782861 | C | 7.712683 | 1.299721  | -2.536486 |
| C | 8.191049  | -0.898446 | 3.542056  | C | 7.77408  | -4.237706 | -0.917698 |
| C | 8.235472  | -4.360745 | -0.332533 | C | 7.812378 | -1.43397  | -3.325057 |
| C | 8.262989  | -2.318845 | 3.237389  | C | 7.91323  | 1.024363  | 2.917236  |
| C | 8.288255  | -4.216357 | 1.113496  | C | 8.051871 | -3.984211 | 1.520651  |
| C | 9.083407  | 2.062897  | -0.975345 | C | 8.160041 | 2.391809  | -0.371321 |
| C | 9.093894  | 0.503337  | -2.733177 | C | 8.338043 | -3.452532 | -2.004027 |
| C | 9.135748  | 2.202906  | 0.410803  | C | 8.452884 | 1.775948  | 1.874582  |
| C | 9.155359  | -0.860042 | -3.029707 | C | 8.479983 | -0.270892 | 3.249795  |
| C | 9.282766  | 1.020485  | 2.436302  | C | 8.552858 | -3.012913 | 2.482546  |
| C | 9.315642  | -3.011101 | -2.092821 | C | 8.622011 | -4.064095 | 0.248221  |
| C | 9.37474   | -0.257878 | 2.990944  | C | 8.913947 | 0.595298  | -2.450519 |
| C | 9.410979  | -3.716063 | -0.890932 | C | 8.962473 | -0.803494 | -2.845158 |
| C | 9.482727  | -2.552875 | 2.489456  | C | 9.402677 | 1.648864  | -0.271231 |
| C | 9.495818  | -3.482052 | 1.446882  | C | 9.53438  | -2.795203 | -1.508147 |
| C | 9.879626  | 1.042195  | -1.634416 | C | 9.565844 | -0.763747 | 2.523164  |
| C | 9.983766  | 1.326219  | 1.199331  | C | 9.585159 | 1.267198  | 1.120123  |
| C | -0.253683 | -2.321573 | 0.024909  | C | 9.603326 | -2.161746 | 2.132463  |
| C | -0.471626 | -2.441998 | -1.347652 | C | 9.711183 | -3.173597 | -0.116344 |
| C | -1.298179 | 3.434991  | 0.648419  | C | 9.772436 | 0.767123  | -1.289189 |
| C | -1.881678 | 2.734746  | -4.360189 | C | 9.839562 | -1.496681 | -1.921883 |

|   |           |           |           |   |           |           |           |
|---|-----------|-----------|-----------|---|-----------|-----------|-----------|
| C | -1.93663  | 2.038806  | -3.150821 | C | -0.964029 | 4.845868  | -0.989413 |
| C | -2.428303 | 4.01457   | -4.455258 | C | -1.72475  | 5.28192   | 0.255574  |
| C | -2.518049 | 1.720641  | 4.080693  | C | -2.504291 | 3.127795  | 3.508918  |
| C | -2.545262 | 2.606938  | -2.02517  | C | -2.553184 | 3.534838  | 4.84385   |
| C | -2.63072  | 1.809558  | -0.738772 | C | -2.702868 | -1.776419 | 0.415999  |
| C | -2.660369 | 2.301575  | 5.343435  | C | -2.911526 | -0.363515 | 0.182392  |
| C | -2.837134 | 1.70814   | 1.579945  | C | -2.960733 | -2.486704 | -0.82409  |
| C | -2.968119 | 2.382061  | 2.931488  | C | -3.064843 | -2.356083 | 1.637501  |
| C | -3.033103 | 4.591996  | -3.336226 | C | -3.266082 | 5.265717  | 0.183749  |
| C | -3.096374 | 3.891974  | -2.131997 | C | -3.306058 | -0.19782  | -1.234626 |
| C | -3.247499 | 3.560749  | 5.469489  | C | -3.331104 | -1.513528 | -1.836496 |
| C | -3.562339 | 3.644984  | 3.070612  | C | -3.467228 | 2.994792  | 1.177348  |
| C | -3.695513 | 4.231289  | 4.328596  | C | -3.479741 | 0.424932  | 1.160192  |
| C | -3.906128 | -1.51409  | -0.566142 | C | -3.523793 | 3.476198  | 2.61508   |
| C | -4.013293 | 1.054967  | -0.527567 | C | -3.568375 | -3.742391 | -0.800644 |
| C | -4.027277 | -0.30947  | -1.224584 | C | -3.622209 | 4.306931  | 5.298761  |
| C | -4.031899 | -1.579279 | 0.907089  | C | -3.673074 | -1.534516 | 2.655244  |
| C | -4.153452 | 0.984557  | 1.071441  | C | -3.709416 | -3.656376 | 1.663453  |
| C | -4.27425  | -0.43503  | 1.636853  | C | -3.891448 | -0.176038 | 2.398495  |
| C | -4.516886 | -2.70794  | -1.10943  | C | -3.957619 | -4.335894 | 0.468869  |
| C | -4.719034 | -2.810785 | 1.232296  | C | -4.089901 | 3.258896  | -1.068032 |
| C | -4.799104 | -0.246136 | -2.43517  | C | -4.246011 | 0.745987  | -1.588441 |
| C | -5.018672 | -3.507264 | -0.005969 | C | -4.300045 | -1.83991  | -2.792289 |
| C | -5.202389 | 1.722417  | -1.234284 | C | -4.306061 | 1.68425   | 0.875726  |
| C | -5.23134  | -2.656778 | -2.311772 | C | -4.447962 | 4.004028  | -3.450918 |
| C | -5.242966 | -0.470578 | 2.698059  | C | -4.586182 | -4.073593 | -1.785195 |
| C | -5.374842 | -1.393514 | -2.992972 | C | -4.594856 | 4.250777  | 3.082698  |
| C | -5.450555 | 1.596714  | 1.619253  | C | -4.641353 | 4.665806  | 4.412925  |
| C | -5.526493 | 1.008373  | -2.440339 | C | -4.697143 | -2.319743 | 3.325083  |



|   |           |           |           |   |           |           |           |
|---|-----------|-----------|-----------|---|-----------|-----------|-----------|
| C | -5.629707 | -2.858313 | 2.293862  | C | -4.72045  | -3.634634 | 2.708655  |
| C | -5.897624 | -1.657526 | 3.046779  | C | -4.733697 | 1.86565   | -0.662333 |
| C | -5.970499 | 0.783949  | 2.685967  | C | -4.864966 | 4.034857  | -2.115546 |
| C | -6.193149 | 2.430648  | -0.59224  | C | -4.943707 | -3.140532 | -2.761054 |
| C | -6.209436 | -4.221271 | -0.140213 | C | -5.129588 | 0.454447  | 2.814691  |
| C | -6.32109  | 2.365541  | 0.880288  | C | -5.171013 | 4.675182  | -4.438648 |
| C | -6.477981 | -3.387562 | -2.449084 | C | -5.219223 | -5.022403 | 0.271425  |
| C | -6.711134 | -1.331427 | -3.562706 | C | -5.26789  | 0.399335  | -2.537277 |
| C | -6.804094 | 1.071161  | -3.006385 | C | -5.292944 | -0.85736  | -3.152813 |
| C | -6.876101 | -3.588821 | 2.151788  | C | -5.48078  | 1.449364  | 1.836412  |
| C | -6.958629 | -4.153608 | -1.384929 | C | -5.607991 | -4.85994  | -1.122189 |
| C | -7.161492 | -4.256269 | 0.958782  | C | -5.88761  | -1.714359 | 3.724998  |
| C | -7.31228  | -1.634777 | 3.382169  | C | -5.93697  | -4.29263  | 2.516381  |
| C | -7.326565 | 0.807512  | 3.028081  | C | -6.011766 | 4.770001  | -1.782351 |
| C | -7.39507  | -2.567226 | -3.224233 | C | -6.105868 | -0.298194 | 3.476021  |
| C | -7.410196 | -0.125279 | -3.568471 | C | -6.191103 | -5.000524 | 1.274188  |
| C | -7.53009  | 2.485862  | -1.143375 | C | -6.245988 | 1.767761  | -0.908976 |
| C | -7.732892 | 2.38315   | 1.197026  | C | -6.3142   | 5.399251  | -4.099151 |
| C | -7.834246 | 1.830126  | -2.340955 | C | -6.343642 | -2.956264 | -3.109518 |
| C | -7.918679 | -2.831448 | 2.825788  | C | -6.504572 | 1.028372  | -2.115861 |
| C | -8.011055 | -0.428459 | 3.372304  | C | -6.560137 | -1.541064 | -3.353885 |
| C | -8.232801 | 1.628667  | 2.263571  | C | -6.72897  | 5.44972   | -2.766186 |
| C | -8.370146 | -4.134837 | -1.05484  | C | -6.805488 | 1.613972  | 1.499434  |
| C | -8.479143 | 2.458104  | -0.045482 | C | -6.95253  | -4.68209  | -1.4553   |
| C | -8.495676 | -4.198309 | 0.394274  | C | -7.153808 | -2.399044 | 3.530198  |
| C | -8.753929 | -2.546496 | -2.903398 | C | -7.178422 | -3.662364 | 2.936018  |
| C | -8.824761 | -0.102041 | -3.239355 | C | -7.200502 | 1.778907  | 0.083049  |
| C | -9.086365 | 1.109331  | -2.478252 | C | -7.327509 | -3.711544 | -2.468203 |
| C | -9.202591 | -2.772855 | 2.2798    | C | -7.494183 | -0.10776  | 3.135002  |

|   |            |           |           |   |           |           |           |
|---|------------|-----------|-----------|---|-----------|-----------|-----------|
| C | -9.25105   | -3.345953 | -1.797874 | C | -7.58916  | -4.81002  | 0.926018  |
| C | -9.348441  | -0.366109 | 2.808808  | C | -7.724748 | 0.377986  | -2.327896 |
| C | -9.483586  | -1.288714 | -2.911651 | C | -7.749527 | -0.936422 | -2.94945  |
| C | -9.484691  | 0.908409  | 2.121698  | C | -7.830876 | 0.826119  | 2.149323  |
| C | -9.496901  | -3.469942 | 1.040482  | C | -7.961748 | -4.653917 | -0.410068 |
| C | -9.690573  | 1.778945  | -0.179845 | C | -8.14823  | -1.403061 | 3.163832  |
| C | -9.932297  | -1.515053 | 2.271596  | C | -8.19848  | -3.982098 | 1.95293   |
| C | -9.996722  | 1.082979  | -1.419448 | C | -8.45839  | 1.088081  | -0.10167  |
| C | 10.00286   | -1.736683 | -2.24519  | C | -8.56908  | -3.081461 | -2.048499 |
| C | 10.170101  | -1.278502 | 2.337036  | C | -8.729648 | 0.408309  | -1.293784 |
| C | 10.190866  | -3.173525 | 0.208444  | C | -8.776226 | -1.721221 | -2.286049 |
| C | 10.693927  | 0.197156  | -0.877883 | C | -8.849376 | 0.502122  | 1.167315  |
| C | 10.747033  | 0.341846  | 0.56816   | C | -8.960094 | -3.663875 | -0.776829 |
| C | 10.757109  | -1.219894 | -1.189509 | C | -9.126517 | -1.712453 | 2.216462  |
| C | 10.842355  | -0.985949 | 1.148328  | C | -9.153208 | -3.025255 | 1.601589  |
| C | 10.849713  | -1.951688 | 0.062301  | C | -9.382146 | -0.887448 | -1.259842 |
| C | -10.199513 | 0.98066   | 0.924099  | C | -9.491346 | -0.736328 | 1.202098  |
| C | -10.28878  | -2.584402 | -1.123113 | C | -9.542032 | -2.862762 | 0.208052  |
| C | -10.409145 | -2.645098 | 0.266188  | C | -9.755516 | -1.449782 | -0.037138 |
| C | -10.431231 | -1.312674 | -1.811378 | C | 10.129968 | 0.021246  | 1.436776  |
| C | -10.676924 | -1.436586 | 1.027133  | C | 10.191592 | -2.242477 | 0.805975  |
| C | -10.682359 | -0.148982 | -1.081145 | C | 10.340496 | -0.525515 | -0.959891 |
| C | -10.807661 | -0.212277 | 0.367949  | C | 10.515734 | -0.892815 | 0.376128  |
| H | 0.077311   | 2.970698  | 3.726059  | H | 0.084968  | -0.317916 | -5.904895 |
| H | 0.184142   | 2.040528  | -1.165425 | H | 0.105578  | 2.5268    | -1.499748 |
| H | 0.763945   | -1.237023 | 1.583806  | H | 0.167802  | 2.638077  | 0.264123  |
| H | 1.009432   | 3.569238  | -0.90206  | H | 0.306311  | -1.023527 | -1.670383 |
| H | 1.508527   | 0.115778  | -2.419889 | H | 0.931569  | 5.027797  | 0.050414  |
| H | 1.560703   | 3.964936  | 3.849626  | H | 1.047428  | 4.825399  | -1.713543 |

|   |           |           |           |   |           |           |           |
|---|-----------|-----------|-----------|---|-----------|-----------|-----------|
| H | 1.63361   | 2.266117  | 3.293553  | H | 1.341262  | 0.503701  | -0.268447 |
| H | 1.986768  | 0.71062   | 1.264931  | H | 1.587111  | 1.647751  | -5.64704  |
| H | 3.084369  | 2.972812  | -2.771795 | H | 2.176541  | 2.16369   | 1.346996  |
| H | 3.205448  | 2.966429  | 0.992884  | H | 2.450135  | 2.266802  | -3.405441 |
| H | 3.593484  | 4.995332  | -4.113481 | H | 2.666451  | 3.725754  | 2.961778  |
| H | 4.090621  | 5.09564   | 0.819072  | H | 3.382612  | 5.999096  | 3.631793  |
| H | 4.380959  | 7.070138  | -2.988432 | H | 3.810339  | 4.546435  | -1.092959 |
| H | 4.629419  | 7.109609  | -0.51305  | H | 4.318377  | 7.560672  | 1.935371  |
| H | -0.001518 | -1.650095 | -3.29852  | H | 4.52959   | 6.824084  | -0.431657 |
| H | -0.04983  | 1.769214  | 1.34769   | H | -0.559254 | -1.647489 | -3.901576 |
| H | -0.744874 | -2.99929  | 0.717569  | H | -1.352357 | 4.72857   | 1.126518  |
| H | -1.134658 | -3.212874 | -1.729563 | H | -1.413139 | 6.322516  | 0.44317   |
| H | -1.218373 | 4.08915   | -0.223716 | H | -1.666907 | 2.528084  | 3.158184  |
| H | -1.406185 | 2.278278  | -5.224198 | H | -1.754611 | 3.251869  | 5.524442  |
| H | -1.500537 | 4.09101   | 1.49867   | H | -2.417532 | 2.717742  | 0.962324  |
| H | -1.502312 | 1.044419  | -3.0778   | H | -3.104092 | 3.020623  | -1.493719 |
| H | -1.864748 | 1.014973  | -0.77825  | H | -3.542286 | 3.465365  | -3.714685 |
| H | -2.057989 | 0.739275  | 3.987315  | H | -3.587785 | 5.784757  | -0.721633 |
| H | -2.08239  | 0.905857  | 1.678614  | H | -3.630993 | 5.845578  | 1.03805   |
| H | -2.30895  | 1.771215  | 6.224367  | H | -3.660981 | 4.629537  | 6.335686  |
| H | -2.381108 | 4.560922  | -5.393334 | H | -4.83257  | 4.640977  | -5.470782 |
| H | -3.354227 | 4.018225  | 6.44921   | H | -5.38664  | 4.525323  | 2.392632  |
| H | -3.458716 | 5.589786  | -3.401437 | H | -5.476184 | 5.269107  | 4.759716  |
| H | -3.571228 | 4.338584  | -1.264031 | H | -6.331752 | 4.810664  | -0.745922 |
| H | -3.915289 | 4.163803  | 2.184793  | H | -6.874867 | 5.927277  | -4.86601  |
| H | -4.152022 | 5.213283  | 4.418608  | H | -7.614059 | 6.018026  | -2.49198  |
| N | 2.144906  | 1.879558  | -0.498687 | N | 2.030594  | 2.447595  | -0.739309 |
| N | -2.49506  | 2.606972  | 0.480537  | N | -3.959058 | 3.965338  | 0.20964   |
| O | 1.232437  | 4.766324  | 1.470553  | O | -1.494697 | 4.764673  | -2.083302 |

| TsOH |           |           |           | TsO <sup>-</sup> |           |           |           |
|------|-----------|-----------|-----------|------------------|-----------|-----------|-----------|
| C    | 0.121051  | -0.005973 | -0.078408 | C                | 0.539155  | 1.203746  | -0.035723 |
| C    | -0.557007 | 1.212827  | -0.093257 | C                | 0.539155  | -1.203729 | -0.035724 |
| C    | -0.569363 | -1.219069 | -0.032051 | C                | 1.934298  | -1.201161 | -0.020992 |
| C    | -1.95005  | 1.209477  | -0.051253 | C                | 1.934302  | 1.201172  | -0.020991 |
| C    | -1.960267 | -1.200058 | 0.012849  | C                | 2.656197  | 0.000005  | -0.006346 |
| C    | -2.671803 | 0.009658  | 0.008817  | C                | 4.168072  | -0.00001  | 0.043341  |
| C    | -4.179885 | 0.01336   | 0.08055   | C                | -0.16882  | 0.000011  | -0.036744 |
| H    | 2.776993  | 0.721452  | 1.678866  | H                | 2.475018  | -2.147606 | -0.028159 |
| H    | -0.001872 | 2.14263   | -0.156842 | H                | 2.475028  | 2.147611  | -0.028159 |
| H    | -0.022987 | -2.156007 | -0.046955 | H                | 4.543254  | -0.000463 | 1.077409  |
| H    | -2.485164 | 2.155372  | -0.072182 | H                | 4.587166  | 0.886237  | -0.448476 |
| H    | -2.504215 | -2.140849 | 0.043948  | H                | 4.587205  | -0.885814 | -0.44925  |
| H    | -4.523793 | -0.15685  | 1.109196  | H                | -0.020158 | -2.13372  | -0.070202 |
| H    | -4.595481 | 0.969701  | -0.251163 | H                | -0.020167 | 2.133733  | -0.070192 |
| H    | -4.611711 | -0.779628 | -0.539529 | O                | -2.311673 | -0.00016  | 1.463596  |
| O    | 2.283669  | -0.095873 | 1.476859  | O                | -2.366595 | -1.253695 | -0.698831 |
| O    | 2.34613   | -1.26542  | -0.730117 | O                | -2.366619 | 1.253834  | -0.698569 |
| O    | 2.386123  | 1.284432  | -0.595902 | S                | -1.99265  | -0.000001 | 0.010409  |
| S    | 1.9028    | -0.016392 | -0.128471 |                  |           |           |           |

## Control experiments for mechanistic study

Table S4 Control experiments for mechanistic study<sup>a,b</sup>

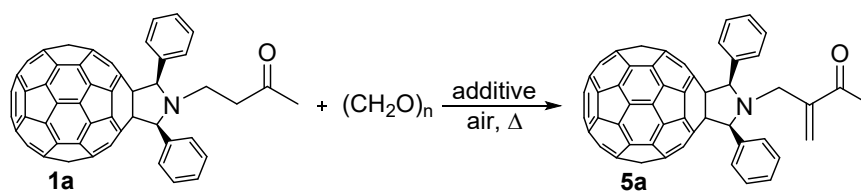

| Entry | Additive              | Molar ratio <sup>b</sup> | Temp. (°C) | Time. ( min ) | Yield (%) of <b>5a</b> |
|-------|-----------------------|--------------------------|------------|---------------|------------------------|
| 1     | TsOH·H <sub>2</sub> O | 1:10:3                   | 40         | 360           | none                   |
| 2     | TsOH·H <sub>2</sub> O | 1:7:2                    | 40         | 180           | none                   |

<sup>a</sup>Unless otherwise indicated, all reactions were performed in chlorobenzene (10 mL) under air conditions. <sup>b</sup>Molar ratio refers to **1a**/(CH<sub>2</sub>O)/TsOH·H<sub>2</sub>O.

## Experimental procedures and spectral data for compounds **1a-l** and **2a-e**

### General procedure for the preparation of ketone-containing fulleropyrrolidines **1**

*N*-unsubstituted fulleropyrrolidines **2** (0.022 mmol), paraformaldehyde (3.3 mg, 0.110 mmol), ketones (0.110 mmol) and TsOH·H<sub>2</sub>O (12.6 mg, 0.066 mmol) were added to a 50 mL round-bottom flask equipped with a reflux condenser and a magnetic stirrer. After they were completely dissolved in chlorobenzene (6 mL) by sonication, the resulting solution was put into an oil bath preset at 80 °C and stirred under air conditions. Thin-layer chromatography (TLC) was employed to carefully monitor the reaction and to stop the reaction at the designated time. The reaction mixture was filtered through a silica gel plug to remove any insoluble material. After the solvent evaporation in vacuo was completed, the residue was separated on a silica gel column with carbon disulfide/dichloromethane as the eluent to afford ketone-containing fulleropyrrolidines **1**.

**Ketone-containing fulleropyrrolidine 1a.** According to the general procedure, the reaction of **2a** (20.0 mg, 0.022 mmol) with (CH<sub>2</sub>O)<sub>n</sub> (3.3 mg, 0.110 mmol), acetone (8

$\mu\text{L}$ , 0.110 mmol) and  $\text{TsOH}\cdot\text{H}_2\text{O}$  (12.6 mg, 0.066 mmol) in chlorobenzene (6 mL) at 80 °C for 15 min afforded **1a**<sup>1</sup> (7.3 mg, 34%) as amorphous brown solid with  $\text{CS}_2/\text{CH}_2\text{Cl}_2 = 5/2$  as the eluent: mp > 300 °C.

**Ketone-containing fulleropyrrolidine 1b.** According to the general procedure, the reaction of **2b** (21.5 mg, 0.022 mmol) with  $(\text{CH}_2\text{O})_n$  (3.3 mg, 0.110 mmol), acetone (8  $\mu\text{L}$ , 0.110 mmol) and  $\text{TsOH}\cdot\text{H}_2\text{O}$  (12.6 mg, 0.066 mmol) in chlorobenzene (6 mL) at 80 °C for 20 min afforded **1b** (7.7 mg, 33%) as amorphous brown solid with  $\text{CS}_2/\text{CH}_2\text{Cl}_2 = 1/1$  as the eluent: mp > 300 °C; **1b**: <sup>1</sup>H NMR (600 MHz,  $\text{CS}_2/\text{DMSO}-d_6$ )  $\delta$  7.99 (d,  $J = 8.6$  Hz, 2H), 7.48 (d,  $J = 8.3$  Hz, 2H), 6.95 (dd,  $J = 8.6, 2.5$  Hz, 2H), 6.80 (dd,  $J = 8.3, 2.5$  Hz, 2H), 5.39 (s, 2H), 3.75 (s, 6H), 3.26 (t,  $J = 7.7$  Hz, 2H), 2.65 (t,  $J = 7.7$  Hz, 2H), 1.91 (s, 3H); <sup>13</sup>C NMR (150 MHz,  $\text{CS}_2/\text{DMSO}-d_6$ ) (all 2C unless indicated)  $\delta$  203.37 (1C, C=O), 158.48 (aryl C), 153.12, 152.66, 145.94, 145.44, 144.93, 144.84 (4C), 144.75, 144.50, 144.35 (1C), 144.19 (3C), 143.91, 143.86, 143.73, 143.35, 143.04, 141.81 (1C), 141.62 (1C), 141.29, 141.18, 140.87, 140.80, 140.71, 140.67, 140.56, 140.17, 138.61, 138.06, 135.43, 134.34, 130.08 (aryl C), 129.22 (aryl C), 126.97 (aryl C), 114.12 (aryl C), 112.10 (aryl C), 77.79, 73.88, 54.05, 42.47 (1C), 35.99 (1C), 29.40 (1C); FT-IR  $\nu/\text{cm}^{-1}$  (KBr) 2927, 1714, 1609, 1509, 1462, 1429, 1247, 1183, 1170, 1090, 1060, 1032, 944, 889, 857, 829, 799, 713, 685, 627, 570, 528; UV-vis ( $\text{CHCl}_3$ )  $\lambda_{\text{max}}/\text{nm}$  257, 309, 431; HRMS (MALDI-TOF)  $m/z$ :  $[\text{M}]^-$  Calcd for  $\text{C}_{80}\text{H}_{23}\text{NO}_3$  1045.1678; Found 1045.1672.

**Ketone-containing fulleropyrrolidine 1c.** According to the general procedure, the reaction of **2c** (20.8 mg, 0.022 mmol) with (CH<sub>2</sub>O)<sub>n</sub> (3.3 mg, 0.110 mmol), acetone (8 μL, 0.110 mmol) and TsOH·H<sub>2</sub>O (12.6 mg, 0.066 mmol) in chlorobenzene (6 mL) at 80 °C for 15 min afforded **1c** (6.2 mg, 28%) as amorphous brown solid with CS<sub>2</sub>/CH<sub>2</sub>Cl<sub>2</sub> = 5/2 as the eluent: mp > 300 °C; **1c**: <sup>1</sup>H NMR (700 MHz, CS<sub>2</sub>/DMSO-*d*<sub>6</sub>) δ 7.99 (d, *J* = 7.7 Hz, 2H), 7.45 (d, *J* = 7.4 Hz, 2H), 7.25 (d, *J* = 7.8 Hz, 2H), 7.11 (d, *J* = 7.3 Hz, 2H), 5.43 (s, 2H), 3.28 (t, *J* = 6.4 Hz, 2H), 2.66 (t, *J* = 6.4 Hz, 2H), 2.35 (s, 6H), 1.91 (d, *J* = 2.3 Hz, 3H); <sup>13</sup>C NMR (175 MHz, CS<sub>2</sub>/DMSO-*d*<sub>6</sub>) (all 2C unless indicated) δ 203.36 (1C, C=O), 153.10, 152.70, 146.07, 145.57, 145.06, 144.98, 144.91, 144.88, 144.63, 144.50 (1C), 144.33 (3C), 144.04, 143.97, 143.87, 143.47, 143.17, 141.95 (1C), 141.76 (1C), 141.42, 141.32, 140.99, 140.93, 140.84, 140.78, 140.66, 140.30, 138.72, 138.16, 137.11, 135.56, 134.49 (aryl C), 132.43 (aryl C), 129.17 (aryl C), 128.97 (aryl C), 128.22 (aryl C), 128.11 (aryl C), 78.20, 73.92, 42.58 (1C), 35.97 (1C), 28.74 (1C), 20.66; FT-IR ν/cm<sup>-1</sup> (KBr) 2920, 2852, 1715, 1507, 1427, 1361, 1272, 1174, 1120, 1031, 822, 678, 573, 525; UV-vis (CHCl<sub>3</sub>) λ<sub>max</sub>/nm 257, 309, 431; HRMS (MALDI-TOF) *m/z*: [M]<sup>-</sup> Calcd for C<sub>80</sub>H<sub>23</sub>NO 1013.1780; Found 1013.1776.

**Ketone-containing fulleropyrrolidine 1d.** According to the general procedure, the reaction of **2d** (21.7 mg, 0.022 mmol) with (CH<sub>2</sub>O)<sub>n</sub> (3.3 mg, 0.110 mmol), acetone (8 μL, 0.110 mmol) and TsOH·H<sub>2</sub>O (12.6 mg, 0.066 mmol) in chlorobenzene (6 mL) at

80 °C for 20 min afforded **1d** (7.4 mg, 32%) as amorphous brown solid with CS<sub>2</sub>/CH<sub>2</sub>Cl<sub>2</sub> = 4/1 as the eluent: mp > 300 °C; **1d**: <sup>1</sup>H NMR (700 MHz, CS<sub>2</sub>/DMSO-*d*<sub>6</sub>) δ 8.10 (dd, *J* = 8.3, 1.9 Hz, 2H), 7.59 (dd, *J* = 8.1, 2.0 Hz, 2H), 7.43 (dd, *J* = 8.4, 2.0 Hz, 2H), 7.30 (dd, *J* = 8.1, 2.0 Hz, 2H), 5.52 (s, 2H), 3.27 (t, *J* = 7.6 Hz, 2H), 2.69 (t, *J* = 7.6 Hz, 2H), 1.95 (s, 3H); <sup>13</sup>C NMR (175 MHz, CS<sub>2</sub>/DMSO-*d*<sub>6</sub>) (all 2C unless indicated) δ 203.72 (1C, C=O), 152.69, 152.49, 146.51, 145.62, 145.50, 145.41, 145.33, 145.08, 144.91, 144.79 (4C), 144.67 (1C), 144.48, 144.47 (1C), 144.30, 143.85, 143.58, 142.37 (1C), 142.21 (1C), 141.88, 141.75, 141.32 (4C), 141.24, 141.10 (4C), 140.75, 139.22, 138.71, 135.98, 134.99, 134.54 (aryl C), 133.97 (aryl C), 130.80 (aryl C), 130.12 (aryl C), 128.66 (aryl C), 127.88 (aryl C), 77.69, 73.98, 42.91 (1C), 36.19 (1C), 29.46 (1C); FT-IR ν/cm<sup>-1</sup> (KBr) 2920, 2855, 1718, 1489, 1421, 1364, 1278, 1224, 1166, 1093, 1017, 832, 793, 673, 573, 525; UV-vis (CHCl<sub>3</sub>) λ<sub>max</sub>/nm 256, 311, 430; HRMS (MALDI-TOF) *m/z*: [M]<sup>-</sup> Calcd for C<sub>78</sub>H<sub>17</sub>Cl<sub>2</sub>NO 1053.0687; Found 1053.0681.

**Ketone-containing fulleropyrrolidine 1e.** According to the general procedure, the reaction of **2e** (23.1 mg, 0.022 mmol) with (CH<sub>2</sub>O)<sub>n</sub> (3.3 mg, 0.110 mmol), acetone (8 μL, 0.110 mmol) and TsOH·H<sub>2</sub>O (12.6 mg, 0.066 mmol) in chlorobenzene (6 mL) at 80 °C for 20 min afforded **1e** (6.1 mg, 25%) as amorphous brown solid with CS<sub>2</sub>/CH<sub>2</sub>Cl<sub>2</sub> = 5/1 as the eluent: mp > 300 °C; **1e**: <sup>1</sup>H NMR (700 MHz, CS<sub>2</sub>/DMSO-*d*<sub>6</sub>) δ 8.35 (d, *J* = 8.1 Hz, 2H), 7.83 (d, *J* = 7.8 Hz, 2H), 7.74



(d,  $J = 8.1$  Hz, 2H), 7.62 (d,  $J = 7.9$  Hz, 2H), 5.68 (s, 2H), 3.28 (t,  $J = 7.4$  Hz, 2H), 2.73 (t,  $J = 7.4$  Hz, 2H), 1.95 (s, 3H);  $^{13}\text{C}$  NMR (175 MHz,  $\text{CS}_2/\text{DMSO-}d_6$ ) (all 2C unless indicated)  $\delta$  203.64 (1C, C=O), 152.11, 152.06, 146.33, 145.32, 145.28, 145.24, 145.16, 144.90, 144.64, 144.57 (1C), 144.47 (3C), 144.32 (4C), 144.12, 143.63, 143.39, 142.18 (1C), 142.05 (1C), 141.71, 141.56, 141.13, 141.09, 141.04, 140.90, 140.86, 140.58, 140.09 (aryl C), 139.05, 138.53, 135.87, 134.89, 129.88 (aryl C), 129.54 (q,  $J_{\text{C-F}} = 32.0$  Hz, aryl C), 129.11 (aryl C), 124.97 (aryl C), 124.56 (aryl C), 122.95 (q,  $J_{\text{C-F}} = 271.4$  Hz), 77.29, 73.67, 42.46 (1C), 35.73 (1C), 29.02 (1C); FT-IR  $\nu/\text{cm}^{-1}$  (KBr) 2923, 2852, 1721, 1427, 1364, 1319, 1170, 1126, 1066, 1017, 841, 672, 573, 526; UV-vis ( $\text{CHCl}_3$ )  $\lambda_{\text{max}}/\text{nm}$  257, 312, 431; HRMS (MALDI-TOF)  $m/z$ :  $[\text{M}]^-$  Calcd for  $\text{C}_{80}\text{H}_{17}\text{F}_6\text{NO}$  1121.1214; Found 1121.1210.

**Ketone-containing fulleropyrrolidine 1f.** According to the general procedure, the reaction of **2f** (21.5 mg, 0.022 mmol) with  $(\text{CH}_2\text{O})_n$  (3.3 mg, 0.110 mmol), acetophenone (13  $\mu\text{l}$ , 0.110 mol) and  $\text{TsOH}\cdot\text{H}_2\text{O}$  (12.6 mg, 0.066 mmol) in chlorobenzene (6 mL) at 80 °C for 20 min afforded **1f**<sup>1</sup> (21.8 mg, 89%) as amorphous brown solid with  $\text{CS}_2/\text{CH}_2\text{Cl}_2 = 5/2$  as the eluent: mp > 300 °C.

**Ketone-containing fulleropyrrolidine 1g.** According to the general procedure, the reaction of **2a** (20.0 mg, 0.022 mmol) with  $(\text{CH}_2\text{O})_n$  (3.3 mg, 0.110 mmol), 4-methoxyacetophenone (16.5 mg, 0.110 mmol) and  $\text{TsOH}\cdot\text{H}_2\text{O}$  (12.6 mg, 0.066 mmol) in chlorobenzene (6 mL) at 80 °C for 20 min afforded **1g**<sup>1</sup> (15.8 mg, 67%) as

amorphous brown solid with CS<sub>2</sub>/CH<sub>2</sub>Cl<sub>2</sub> = 5/1 as the eluent: mp > 300 °C.

**Ketone-containing fulleropyrrolidine 1h.** According to the general procedure, the reaction of **2a** (20.0 mg, 0.022 mmol) with (CH<sub>2</sub>O)<sub>n</sub> (3.3 mg, 0.110 mmol), acetophenone (13 μL, 0.110 mmol) and TsOH·H<sub>2</sub>O (12.6 mg, 0.066 mmol) in chlorobenzene (6 mL) at 80 °C for 15 min afforded **1h**<sup>1</sup> (21.9 mg, 95%) as amorphous brown solid with CS<sub>2</sub> as the eluent: mp > 300 °C.

**Ketone-containing fulleropyrrolidine 1i.** According to the general procedure, the reaction of **2a** (20.0 mg, 0.022 mmol) with (CH<sub>2</sub>O)<sub>n</sub> (3.3 mg, 0.110 mmol), 4-nitroacetophenone (18.2 mg, 0.110 mmol) and TsOH·H<sub>2</sub>O (12.6 mg, 0.066 mmol) in chlorobenzene (6 mL) at 80 °C for 15 min afforded **1i**<sup>1</sup> (23.5 mg, 98%) as amorphous brown solid with CS<sub>2</sub>/CH<sub>2</sub>Cl<sub>2</sub> = 5/1 as the eluent: mp > 300 °C.

**Ketone-containing fulleropyrrolidine 1j.** According to the general procedure, the reaction of **2d** (21.6 mg, 0.022 mmol) with (CH<sub>2</sub>O)<sub>n</sub> (3.3 mg, 0.110 mmol), 4-methoxyacetophenone (16.5 mg, 0.110 mmol) and TsOH·H<sub>2</sub>O (12.6 mg, 0.066 mmol) in chlorobenzene (6 mL) at 80 °C for 20 min afforded **1j** (14.0 mg, 56%) as amorphous brown solid with CS<sub>2</sub>/CH<sub>2</sub>Cl<sub>2</sub> = 5/2 as the eluent: mp > 300 °C; **1j**: <sup>1</sup>H NMR (400 MHz, CS<sub>2</sub>/DMSO-*d*<sub>6</sub>) δ 8.12 (d, *J* = 8.0 Hz, 2H), 7.66-7.63 (m, 4H), 7.40 (d, *J* = 8.2 Hz, 2H), 7.31 (d, *J* = 7.6 Hz, 2H), 6.79 (d, *J* = 8.5 Hz, 2H), 5.67 (s, 2H), 3.81 (s, 3H), 3.41 (t, *J* = 7.5 Hz, 2H), 3.17 (t, *J* = 7.5 Hz, 2H); <sup>13</sup>C NMR (150 MHz, CS<sub>2</sub>/DMSO-*d*<sub>6</sub>) (all 2C unless indicated) δ 194.43 (1C, C=O), 162.19 (1C, aryl C), 152.50, 152.28, 146.19, 145.37, 145.18, 145.09, 145.01, 144.75, 144.67, 144.48 (3C), 144.37 (1C), 144.16 (4C), 143.98, 143.54, 143.27,

142.05 (1C), 141.90 (1C), 141.56, 141.42, 141.00 (4C), 140.93, 140.80, 140.79, 140.44, 138.90, 138.40, 135.72, 134.77, 134.23 (aryl C), 133.61 (aryl C), 130.66 (aryl C), 129.90 (aryl C), 129.35 (aryl C), 128.63 (1C, aryl C), 128.41 (aryl C), 127.63 (aryl C), 112.75 (aryl C), 76.92, 73.71, 54.50 (1C), 43.29 (1C), 30.83 (1C); FT-IR  $\nu/\text{cm}^{-1}$  (KBr) 1676, 1649, 1627, 1492, 1169, 1012, 834, 777, 748, 697, 570, 526 ; UV-vis ( $\text{CHCl}_3$ )  $\lambda_{\text{max}}/\text{nm}$  258, 313, 430; HRMS (MALDI-TOF)  $m/z$ :  $[\text{M}]^-$  Calcd for  $\text{C}_{84}\text{H}_{21}\text{Cl}_2\text{NO}_2$  1145.0949; Found 1145.0941.

**Ketone-containing fulleropyrrolidine 1k.** According to the general procedure, the reaction of **2d** (21.6 mg, 0.022 mmol) with  $(\text{CH}_2\text{O})_n$  (3.3 mg, 0.110 mmol), acetophenone (13  $\mu\text{l}$ , 0.110 mol) and  $\text{TsOH}\cdot\text{H}_2\text{O}$  (12.6 mg, 0.066 mmol) in chlorobenzene (6 mL) at 80 °C for 30 min afforded **1k**<sup>1</sup> (15.6 mg, 64%) as amorphous brown solid with  $\text{CS}_2$  as the eluent: mp > 300 °C.

**Ketone-containing fulleropyrrolidine 1l.** According to the general procedure, the reaction of **2d** (21.6 mg, 0.022 mmol) with  $(\text{CH}_2\text{O})_n$  (3.3 mg, 0.110 mmol), 4-nitroacetophenone (18.2 mg, 0.110 mmmol) and  $\text{TsOH}\cdot\text{H}_2\text{O}$  (12.6 mg, 0.066 mmol) in chlorobenzene (6 mL) at 80 °C for 20 min afforded **1l** (18.5 mg, 72%) as amorphous brown solid with  $\text{CS}_2/\text{CH}_2\text{Cl}_2 = 5/1$  as the eluent: mp > 300 °C; **1l**:  $^1\text{H}$  NMR (400 MHz,  $\text{CS}_2/\text{DMSO}-d_6$ )  $\delta$  8.20 (d,  $J = 8.6$  Hz, 2H), 8.14 (d,  $J = 8.2$  Hz, 2H), 8.05 (d,  $J = 8.6$  Hz, 2H), 7.65 (d,  $J = 7.0$  Hz, 2H), 7.40 (d,  $J = 8.3$  Hz, 2H), 7.29 (d,  $J = 6.7$  Hz, 2H), 5.74 (s, 2H), 3.43 (s, 4H);  $^{13}\text{C}$  NMR (100 MHz,  $\text{CS}_2/\text{DMSO}-d_6$ ) (all 2C unless indicated)  $\delta$  195.19 (1C, C=O), 152.30, 152.09, 148.81 (1C, aryl C),

145.95, 145.13, 144.95, 144.86, 144.78, 144.52, 144.42, 144.25 (3C), 144.13 (1C), 143.92 (3C), 143.75, 143.30, 143.03, 141.83 (1C), 141.67 (1C), 141.33, 141.19, 140.76, 140.71, 140.69, 140.56 (4C), 139.69 (1C, aryl C), 138.65, 138.16, 135.49, 134.53, 133.96 (aryl C), 133.38 (aryl C), 130.58 (aryl C), 129.64 (aryl C), 128.40 (aryl C), 128.24 (aryl C), 127.49 (aryl C), 122.60 (aryl C), 76.27, 73.46, 42.10 (1C), 31.31 (1C); FT-IR  $\nu/\text{cm}^{-1}$  (KBr) 1692, 1607, 1527, 1492, 1345, 1091, 1011, 825, 743, 669, 610, 527; UV-vis ( $\text{CHCl}_3$ )  $\lambda_{\text{max}}/\text{nm}$  257, 312, 430; HRMS (MALDI-TOF)  $m/z$ :  $[\text{M}]^-$  Calcd for  $\text{C}_{83}\text{H}_{18}\text{Cl}_2\text{N}_2\text{O}_3$  1160.0695; Found 1160.0685.

#### **General procedure for the preparation of *N*-unsubstituted fulleropyrrolidines **2****

A mixture of  $\text{C}_{60}$  (36.0 mg, 0.05 mmol), aromatic aldehyde (0.25 mmol), and arylmethylamine (0.25 mmol) was added to a 50 mL round-bottom flask equipped with a reflux condenser and a magnetic stirrer. After the mixed compounds were completely dissolved in *o*-dichlorobenzene (6 mL) by sonication, the resulting solution was heated with stirring in an oil bath preset at 160 °C under air conditions. The subsequent processing steps are the same as those shown in general procedure for the synthesis of ketone-containing fulleropyrrolidines **1**, and afford *N*-unsubstituted fulleropyrrolidines **2** as amorphous brown solids with carbon disulfide as the eluent.

***N*-unsubstituted fulleropyrrolidines **2a**.** According to the general procedure, the reaction of  $\text{C}_{60}$  (36.0 mg, 0.05 mmol) with benzaldehyde (25  $\mu\text{L}$ , 0.25 mmol) and benzylamine (27  $\mu\text{L}$ , 0.25 mmol) in *o*-dichlorobenzene (6 mL) at 160 °C for 6 h afforded **2a**<sup>2</sup> (26.0 mg, 57%) as amorphous brown solid with  $\text{CS}_2$  as the eluent:

mp > 300 °C.

***N*-unsubstituted fulleropyrrolidines 2b.** According to the general procedure, the reaction of C<sub>60</sub> (36.0 mg, 0.05 mmol) with 4-methoxybenzaldehyde (30 μL, 0.25 mmol) and 4-methoxybenzylamine (33 μL, 0.25 mmol) in *o*-dichlorobenzene (6 mL) at 160 °C for 17 h afforded **2b**<sup>2</sup> (25.6 mg, 53%) as amorphous brown solid with CS<sub>2</sub> as the eluent: mp > 300 °C.

***N*-unsubstituted fulleropyrrolidines 2c.** According to the general procedure, the reaction of C<sub>60</sub> (36.0 mg, 0.05 mmol) with 4-methylbenzaldehyde (29 μL, 0.25 mmol) and 4-methylbenzylamine (32 μL, 0.25 mmol) in *o*-dichlorobenzene (6 mL) at 160 °C for 4 h afforded **2c** (25.0 mg, 53%) as amorphous brown solid with CS<sub>2</sub> as the eluent: mp > 300 °C; **2c**: <sup>1</sup>H NMR (400 MHz, CS<sub>2</sub>/DMSO-*d*<sub>6</sub>) δ 7.79 (d, *J*=7.5 Hz, 4H), 7.15 (d, *J* = 7.5 Hz, 4H), 5.83 (s, 2H), 3.99 (s, 1H), 2.33 (s, 3H); <sup>13</sup>C NMR (100 MHz, CS<sub>2</sub>/DMSO-*d*<sub>6</sub>) (all 2C unless indicated) δ 153.04, 152.66, 145.85, 145.78, 145.06, 144.92, 144.88, 144.74, 144.50, 144.47 (1C), 144.26 (1C), 144.16, 143.91, 143.84, 143.79, 143.35, 143.06, 141.81 (1C), 141.67 (1C), 141.31, 141.24, 141.06, 140.89, 140.75 (4C), 140.62, 140.19, 138.64, 138.05, 136.44, 135.72, 134.74 (aryl C), 134.30 (aryl C), 128.24 (4C, aryl C), 127.49 (4C, aryl C), 75.44, 73.74, 20.58; FT-IR ν/cm<sup>-1</sup> (KBr) 3316, 1513, 1382, 1180, 814, 665, 614, 579, 528; UV-vis (CHCl<sub>3</sub>) λ<sub>max</sub>/nm 257, 309, 430; HRMS (MALDI-TOF) *m/z*: [M]<sup>-</sup> Calcd for C<sub>76</sub>H<sub>17</sub>N 943.1361; Found 943.1355.

***N*-unsubstituted fulleropyrrolidines 2d.** According to the general procedure, the

reaction of C<sub>60</sub> (36.0 mg, 0.05 mmol) with 4-chlorobenzaldehyde (35.0 mg, 0.25 mmol) and 4-chlorobenzylamine (31 μL, 0.25 mmol) in *o*-dichlorobenzene (6 mL) at 160 °C for 4 h afforded **2d**<sup>2</sup> (24.7 mg, 52%) as amorphous brown solid with CS<sub>2</sub> as the eluent: mp > 300 °C.

***N*-unsubstituted fulleropyrrolidines 2e.** According to our previous study,<sup>7a</sup> the reaction of C<sub>60</sub> (36.0 mg, 0.05 mmol) with 4-trifluoromethylbenzylamine (143 μL, 1.00 mmol) and Fe(ClO<sub>4</sub>)<sub>3</sub>·xH<sub>2</sub>O (46.0 mg, 0.100 mmol) in chlorobenzene (10 mL) at 120 °C for 24 h afforded **2e**<sup>3</sup> (11.0 mg, 21%) as amorphous brown solid with CS<sub>2</sub> as the eluent: mp > 300 °C.

## Reference

1. C. Huang, G. Huang, H.-J. Wang, F.-B. Li, Z. Wang, Y. Huang, L. Liu and C.-Y. Liu, *Adv. Synth. Catal.*, 2018, **360**, 3732.
2. J.-L. Shi, X.-F. Zhang, H.-J. Wang, F.-B. Li, X.-X. Zhong, C.-X. Liu, L. Liu, C.-Y. Liu, H.-M. Qin and Y.-S. Huang, *J. Org. Chem.*, 2016, **81**, 7662.
3. J.-L. Shi, F.-B. Li, X.-F. Zhang, J. Wu, H.-Y. Zhang, J. Peng, C.-X. Liu, L. Liu, P. Wu and J.-X. Li, *J. Org. Chem.*, 2016, **81**, 1769.

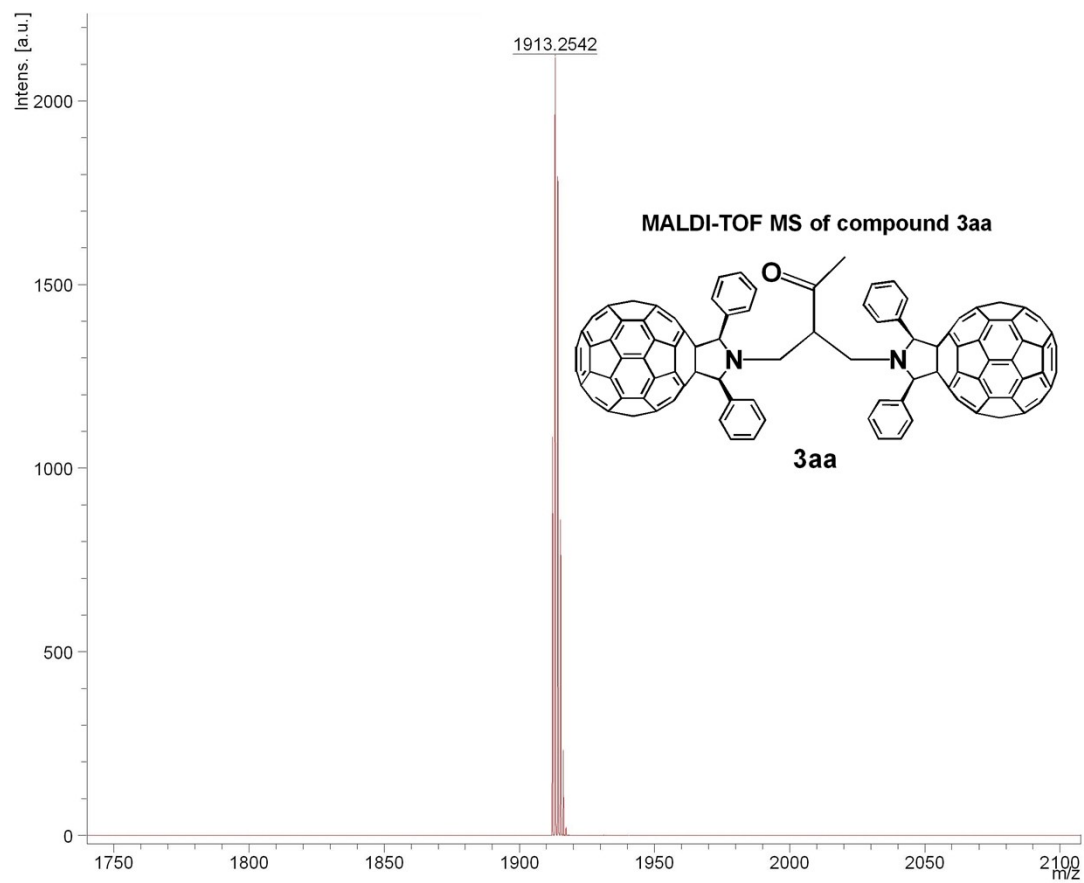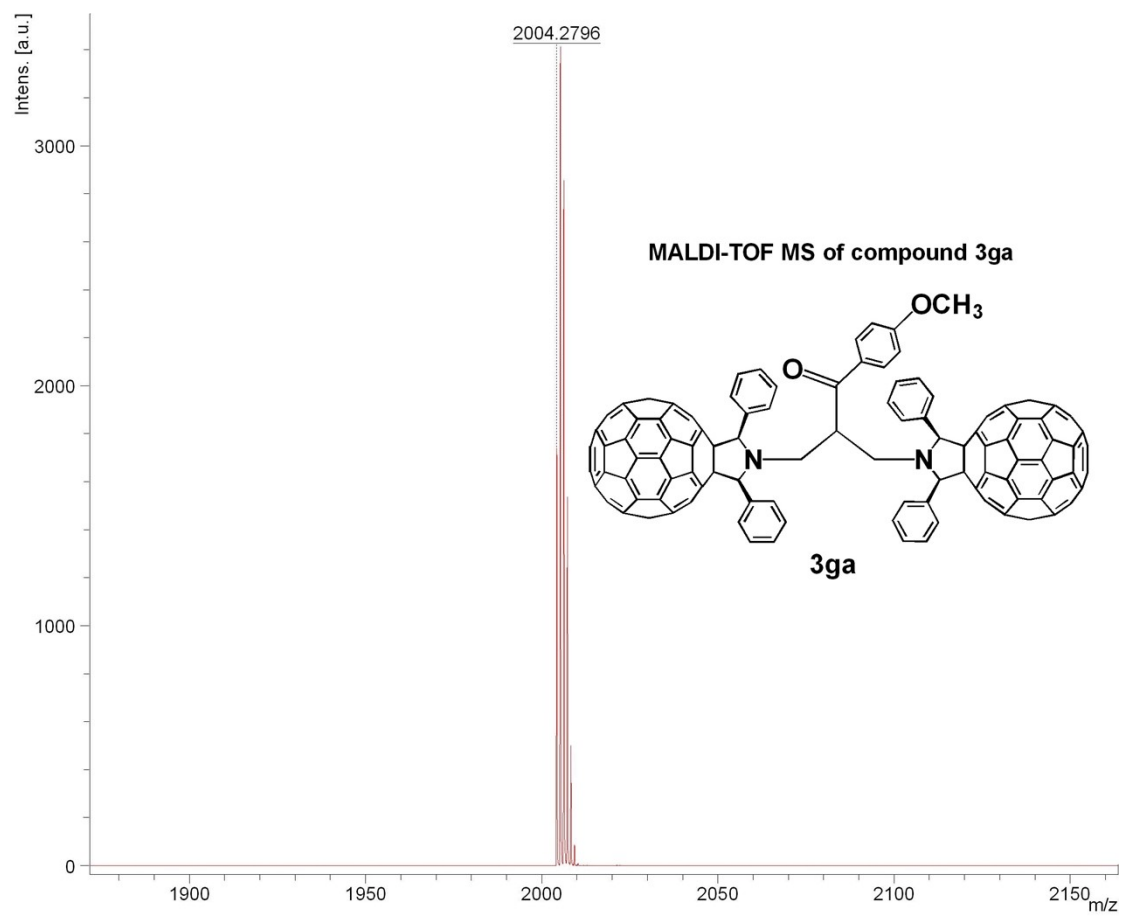

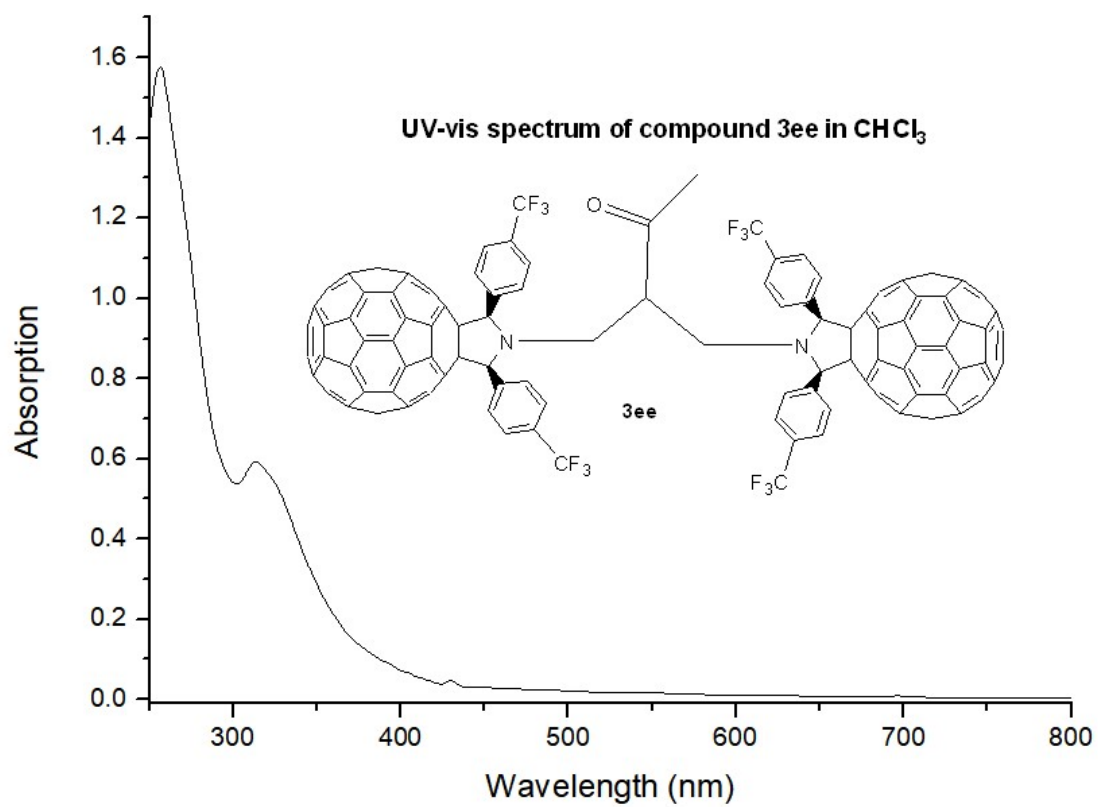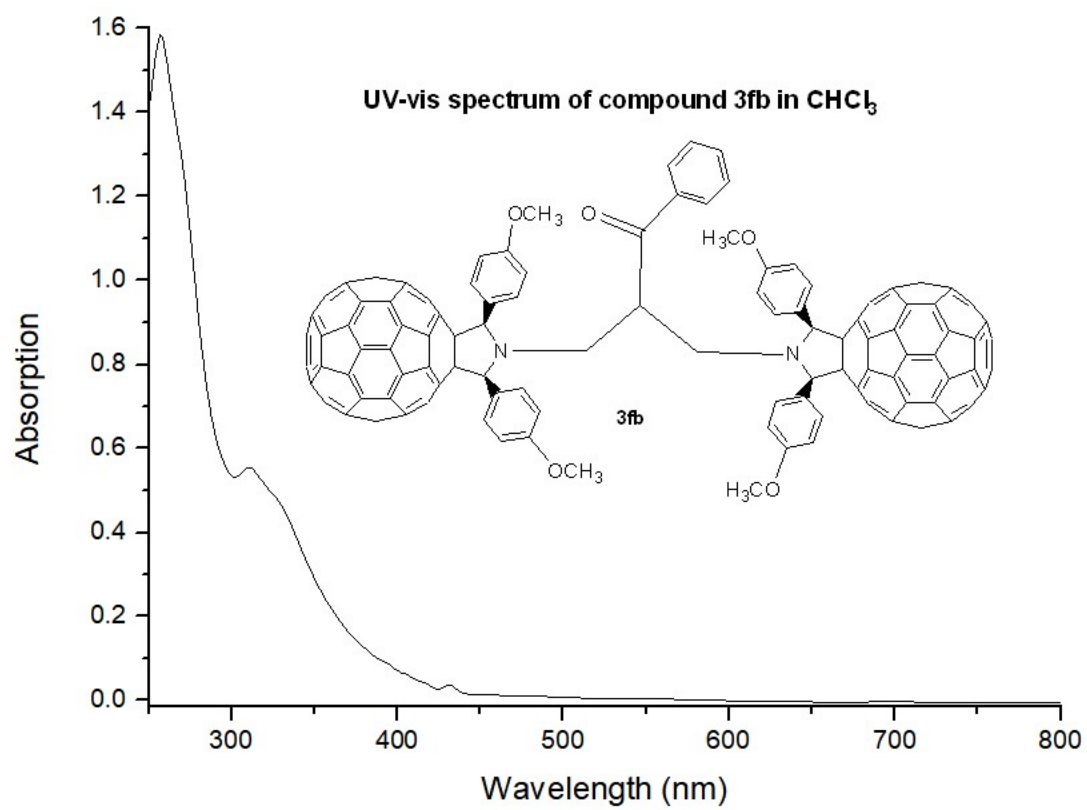



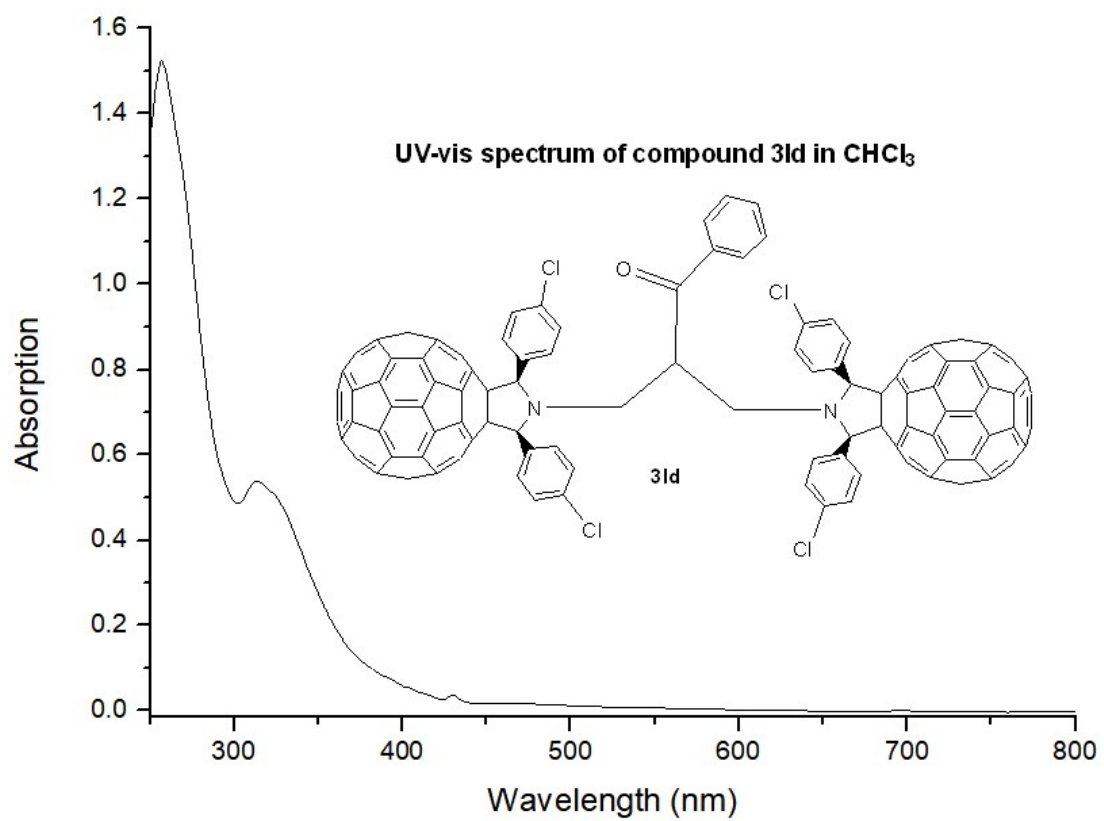

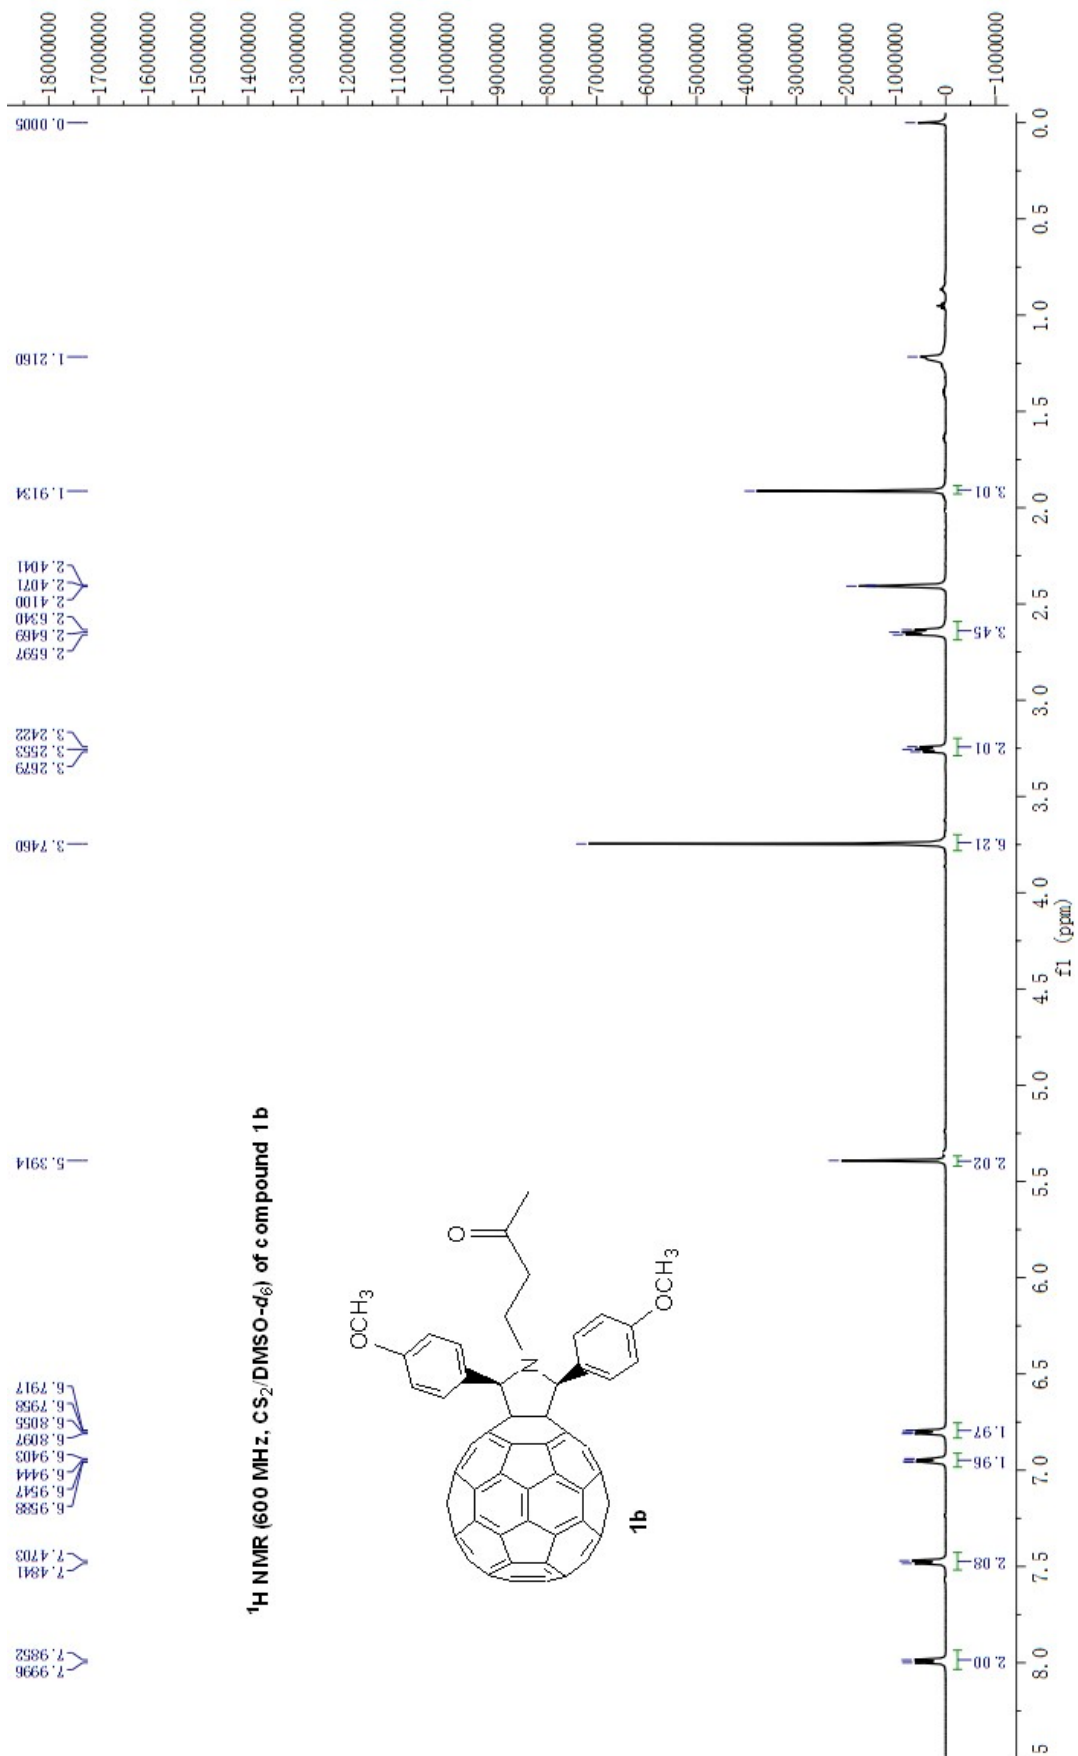

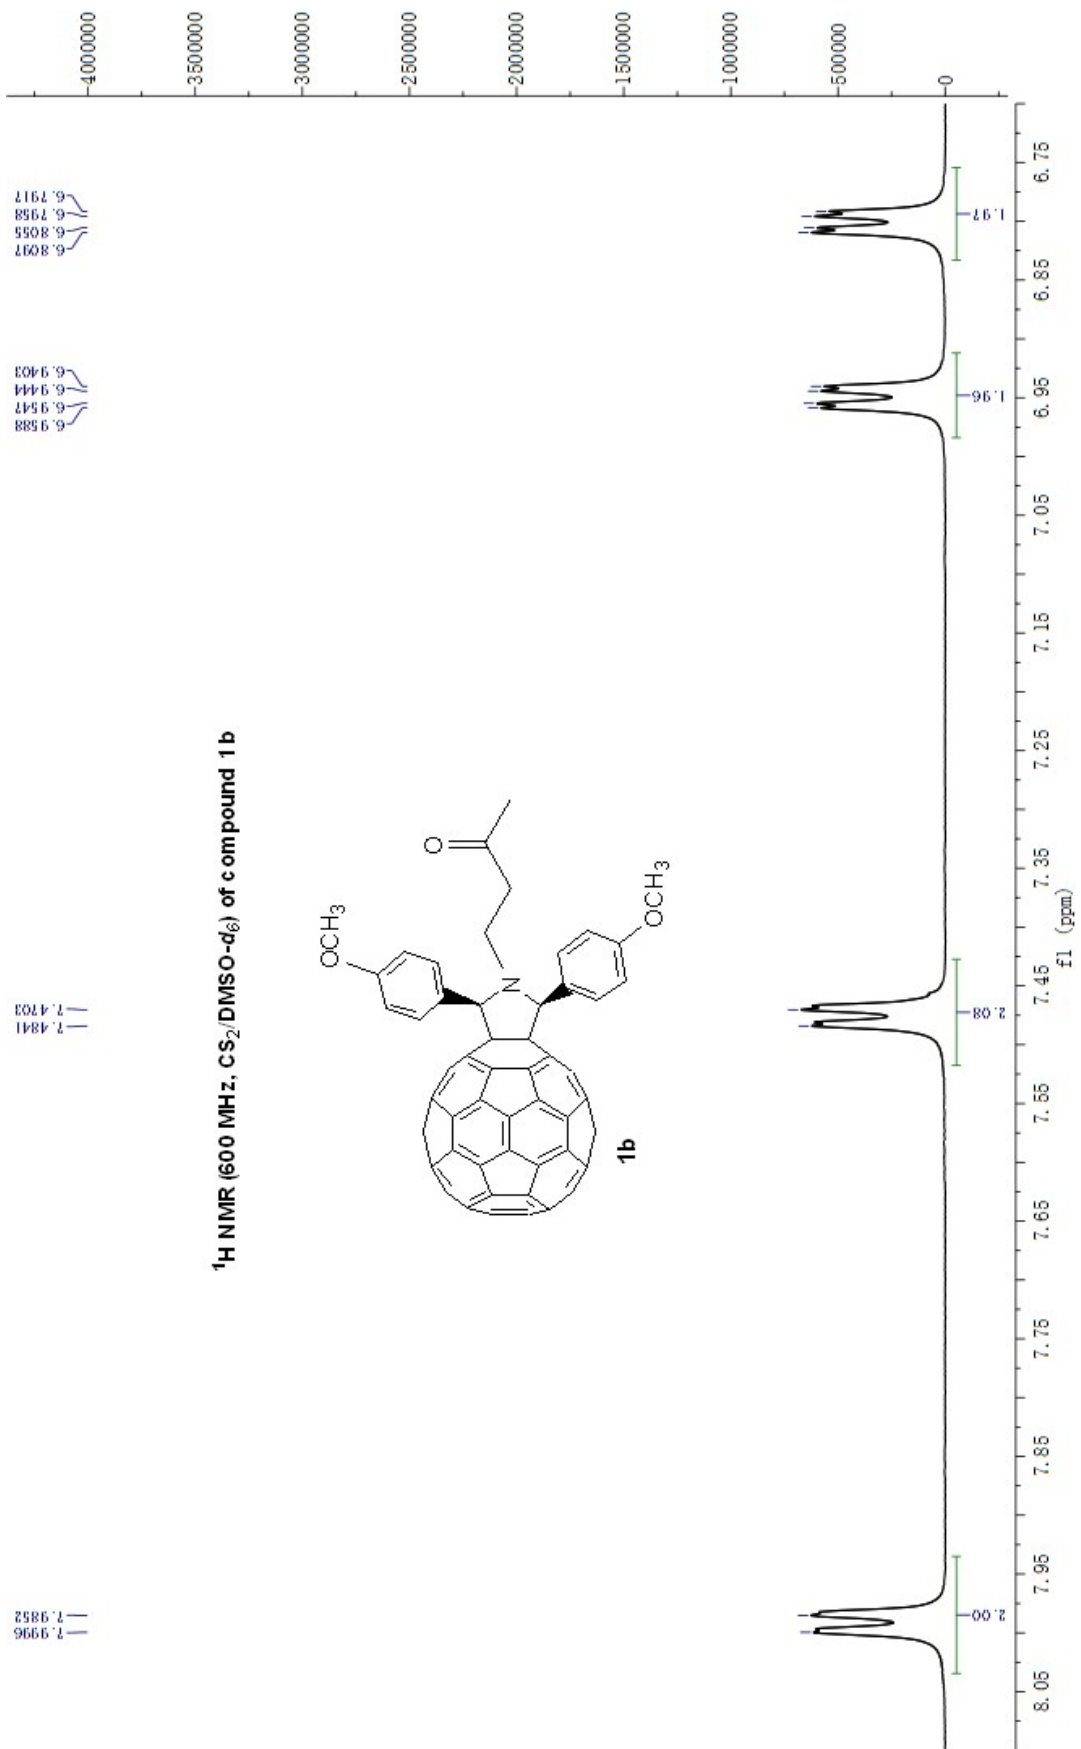

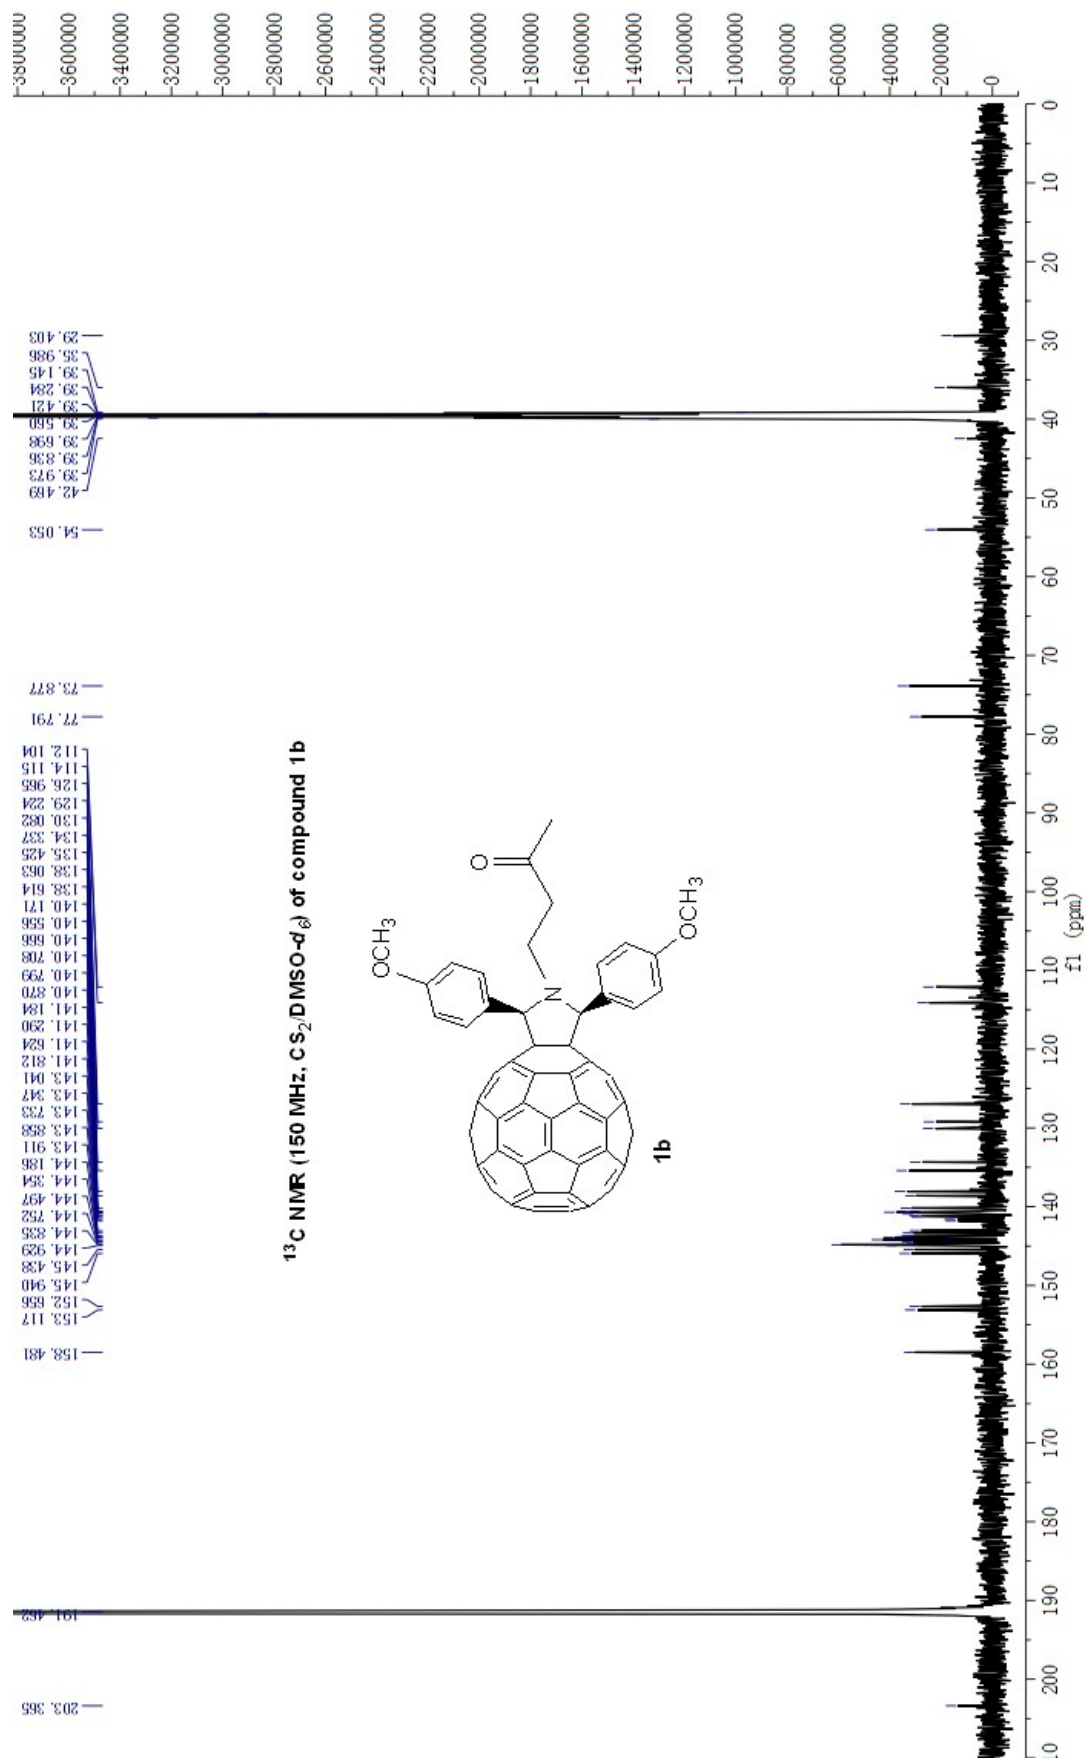

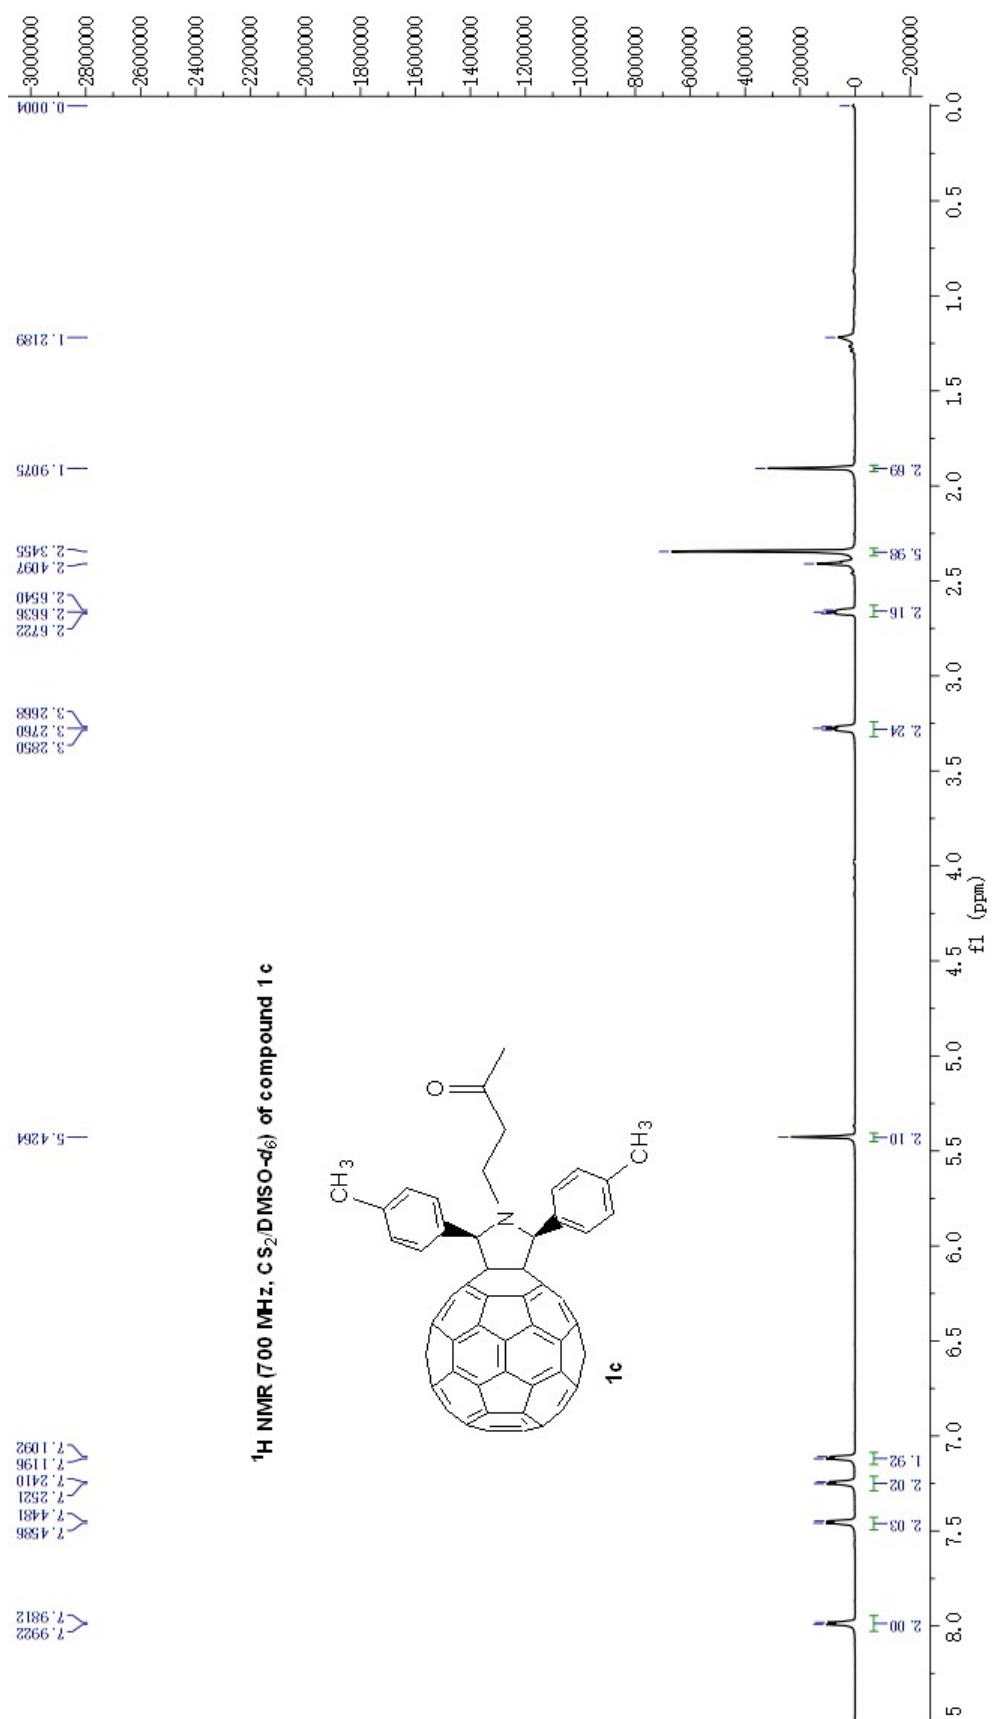

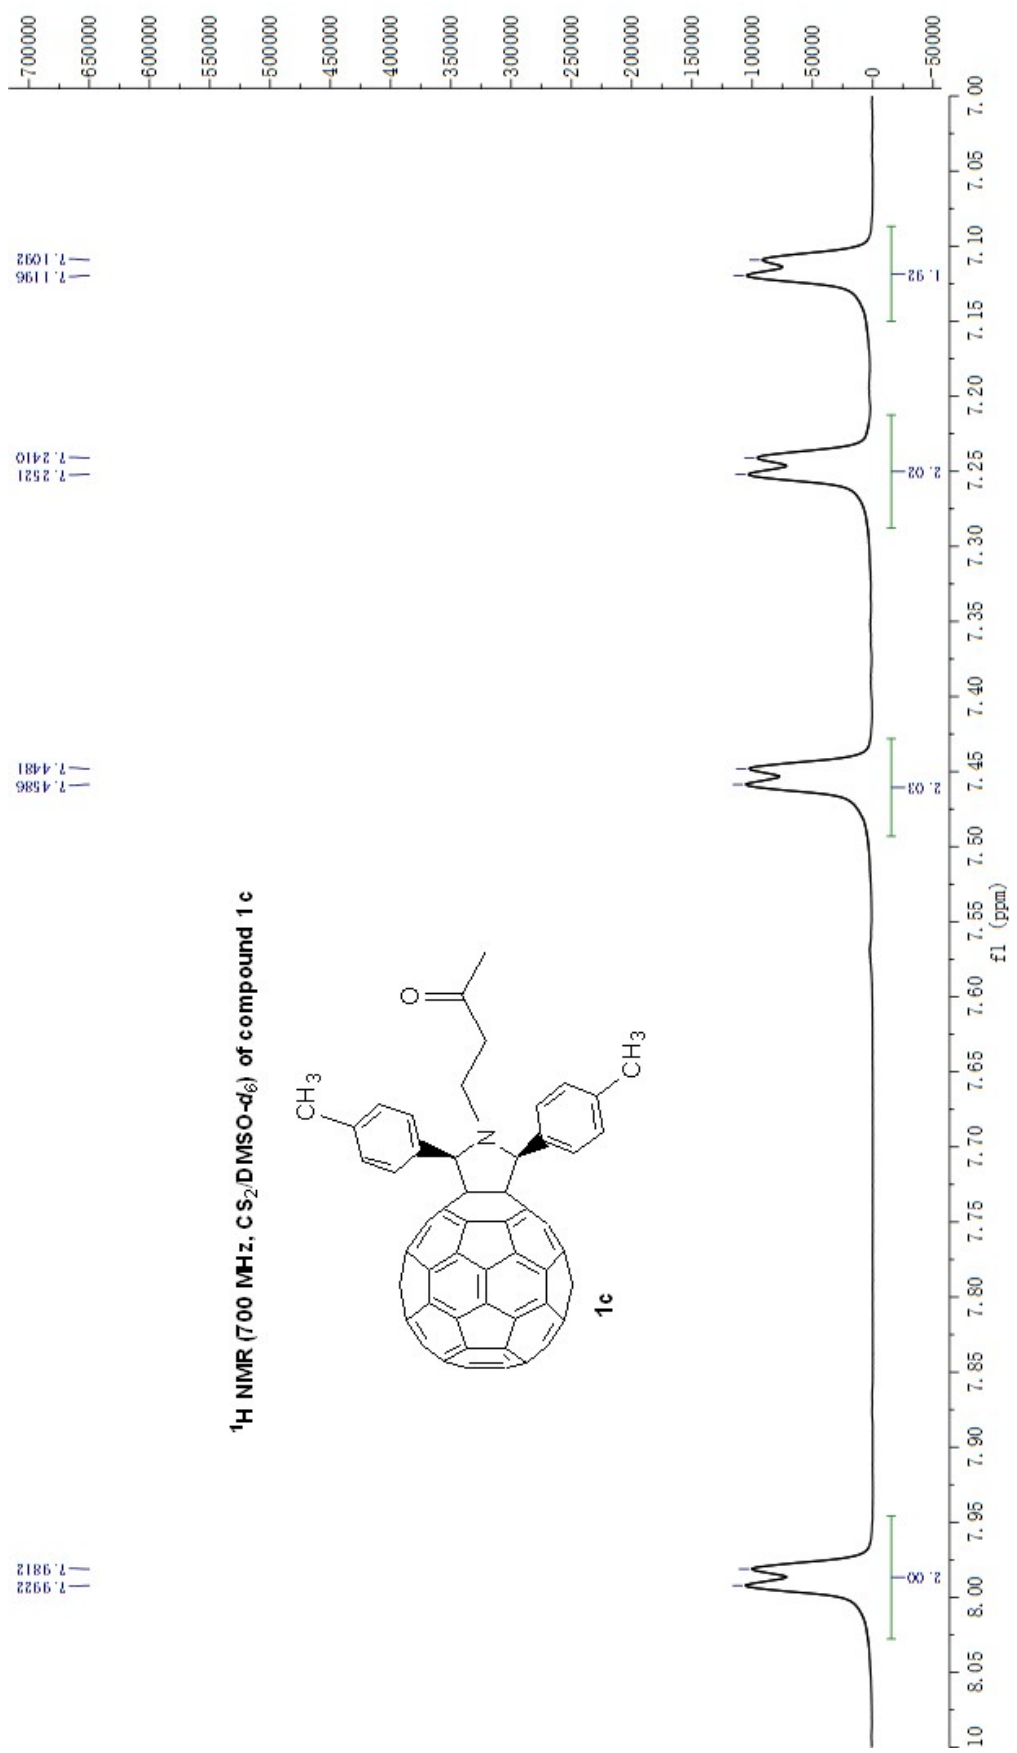

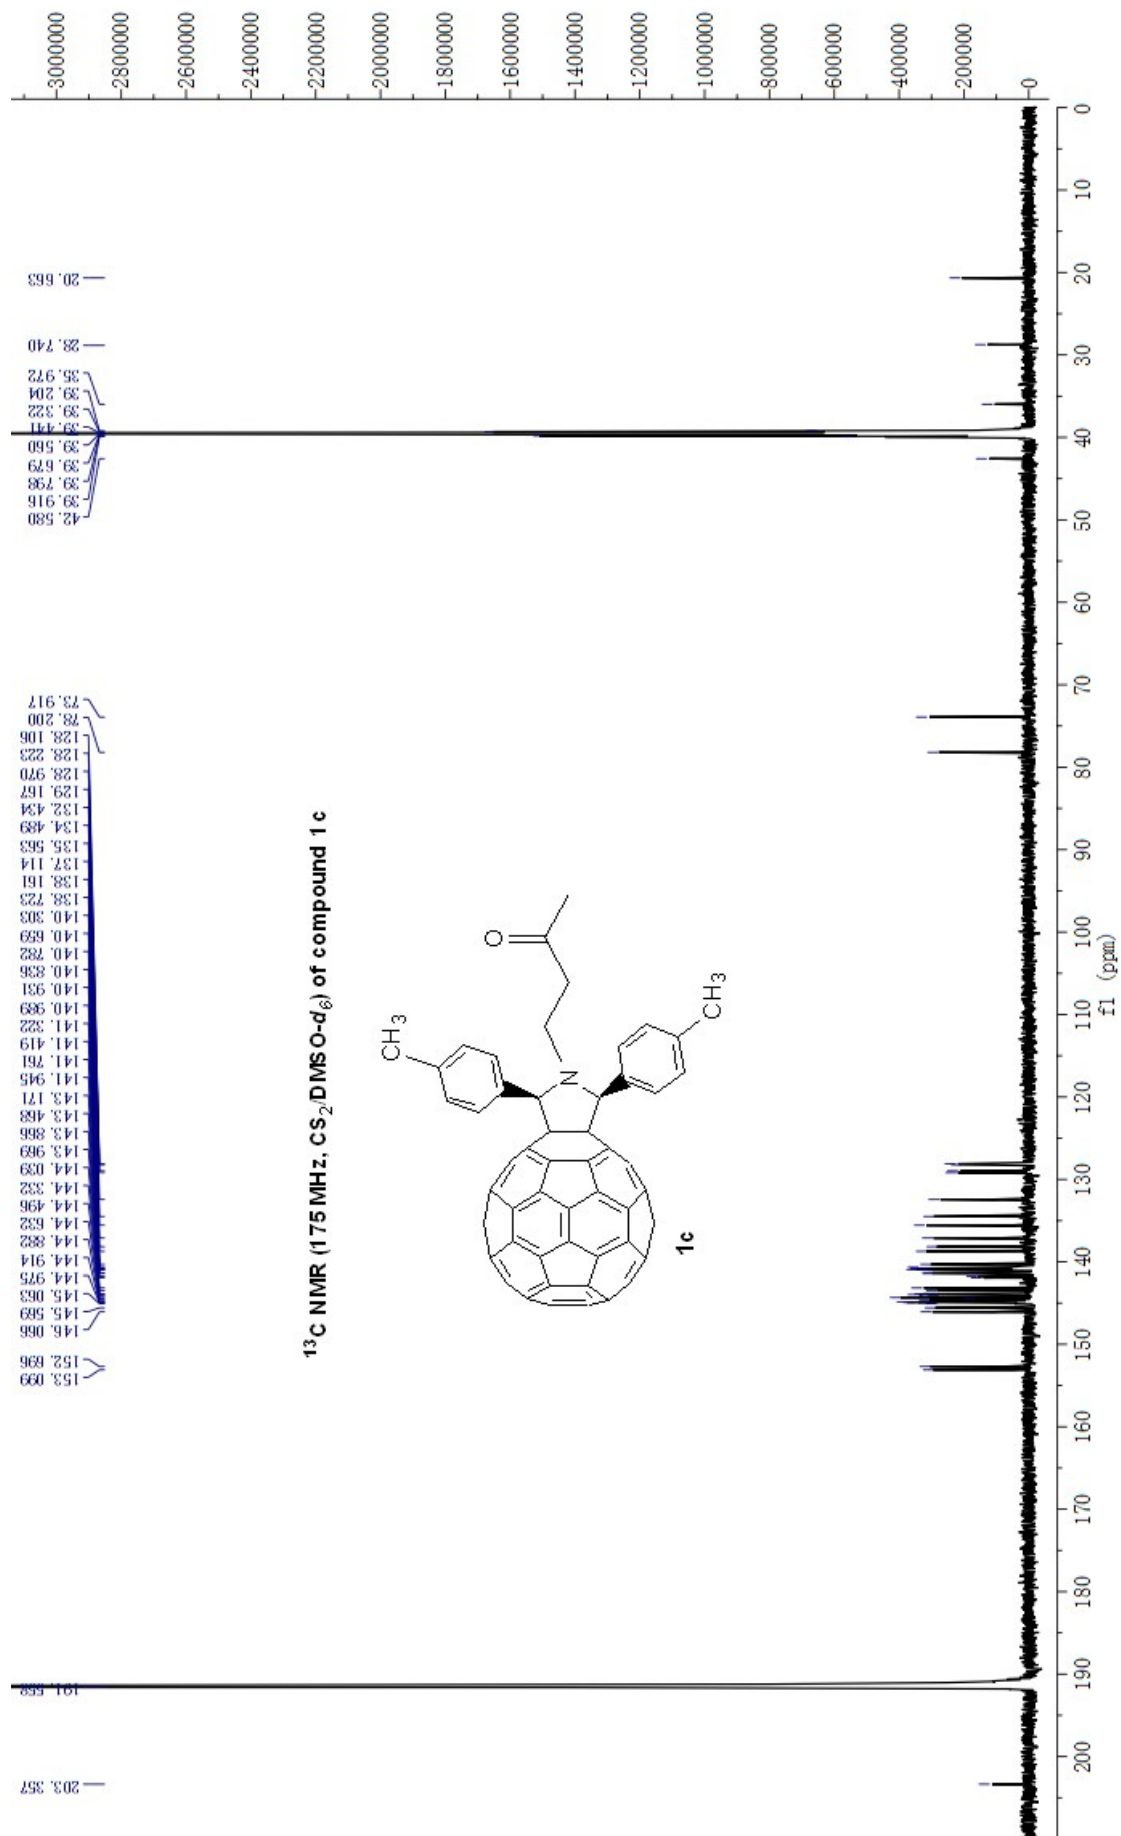

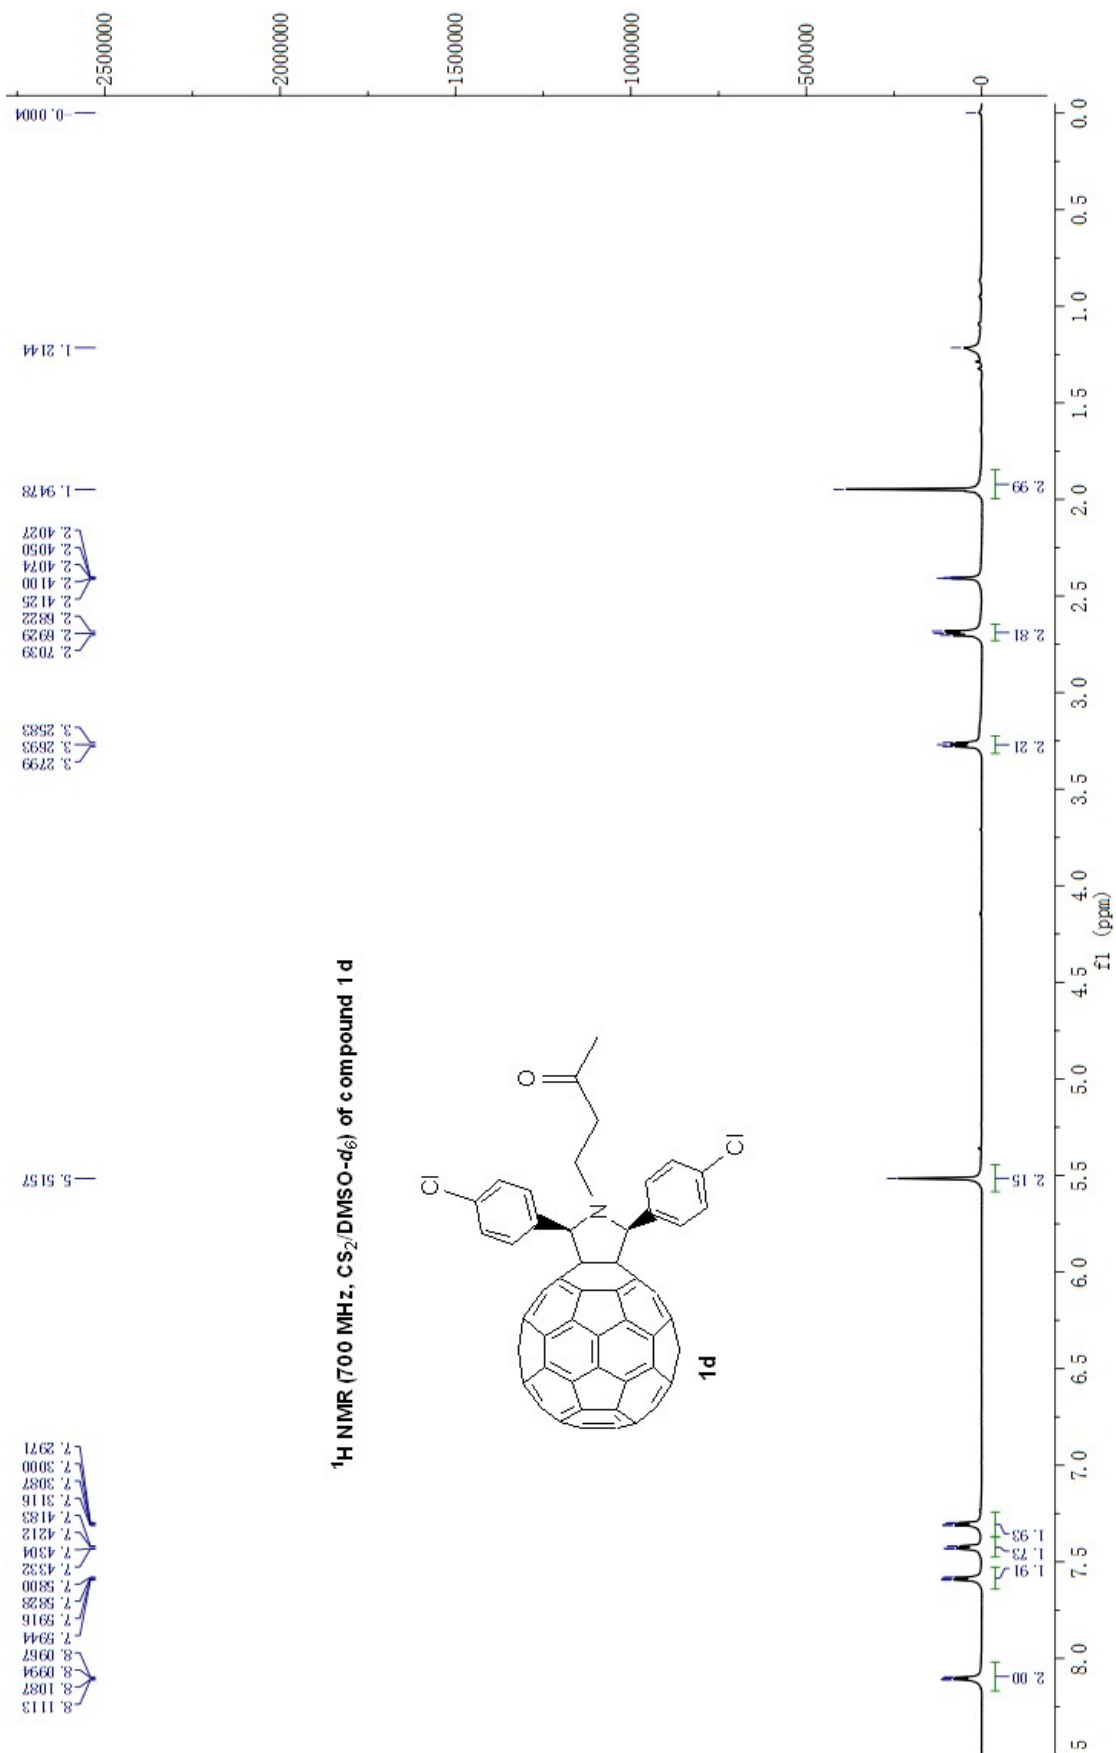



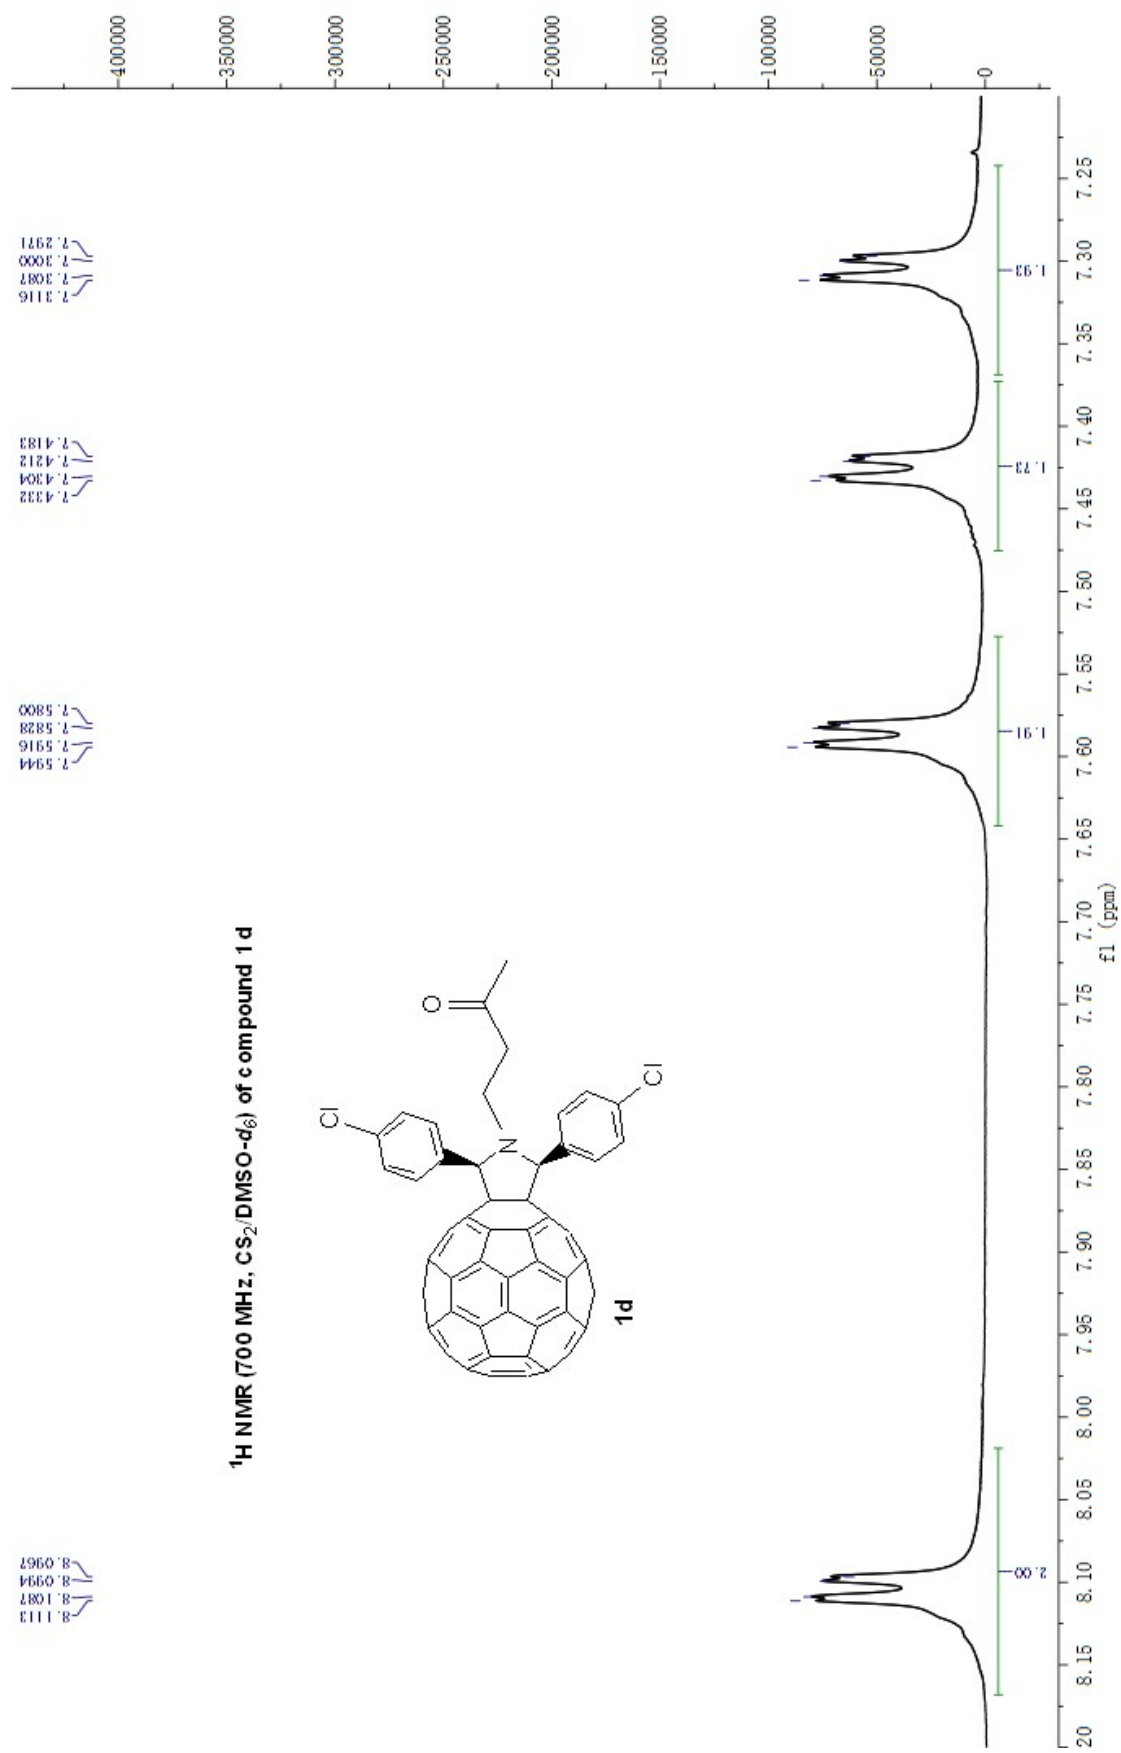

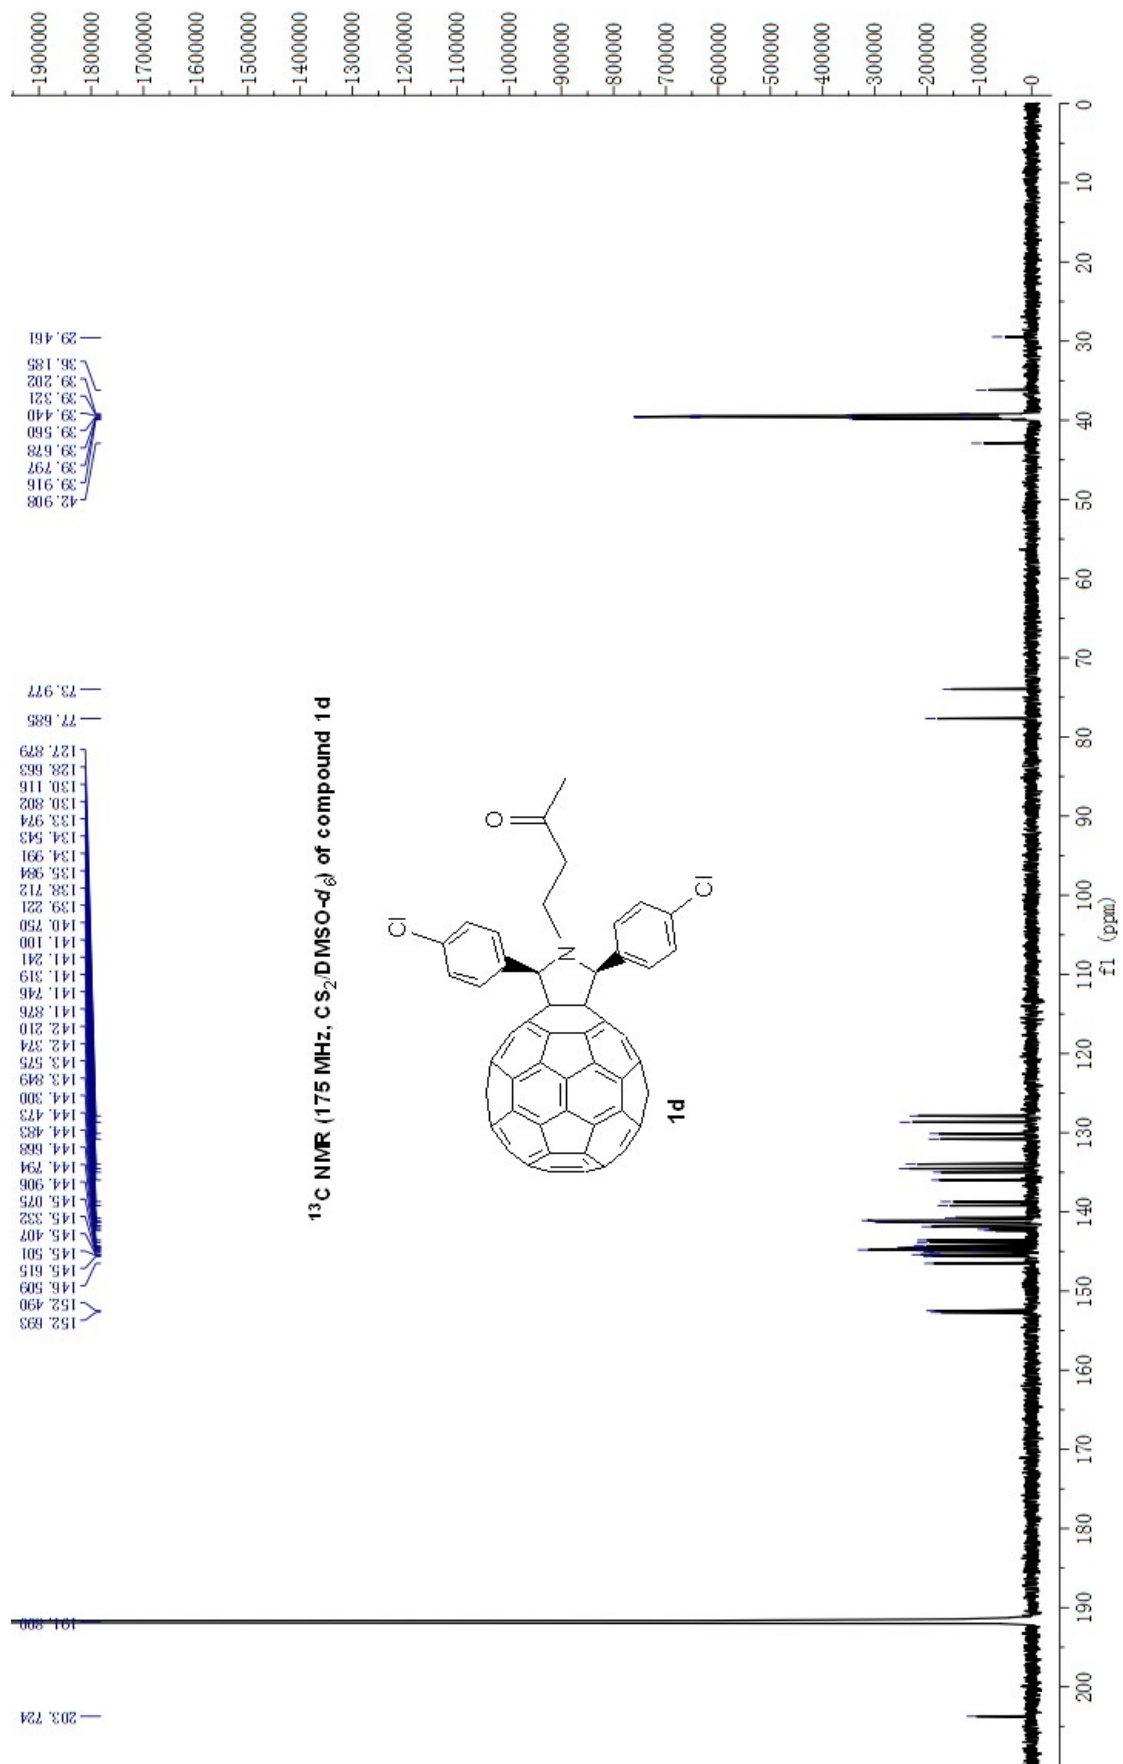

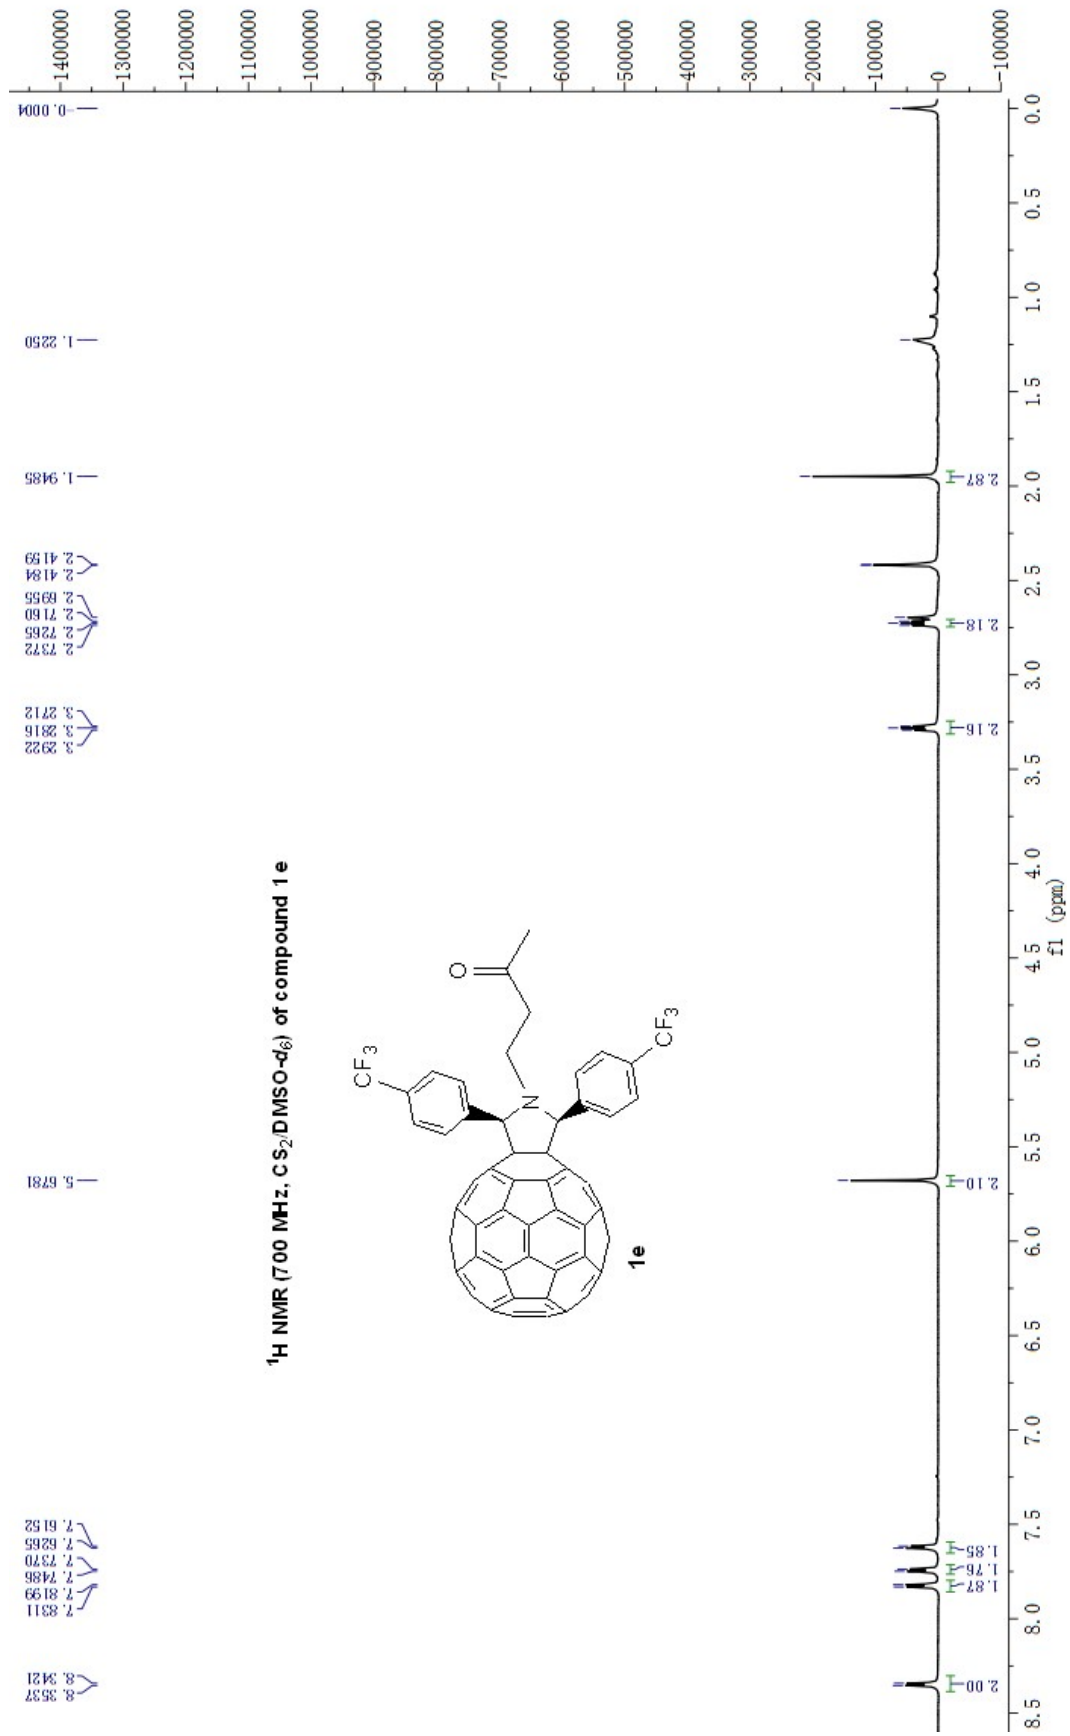

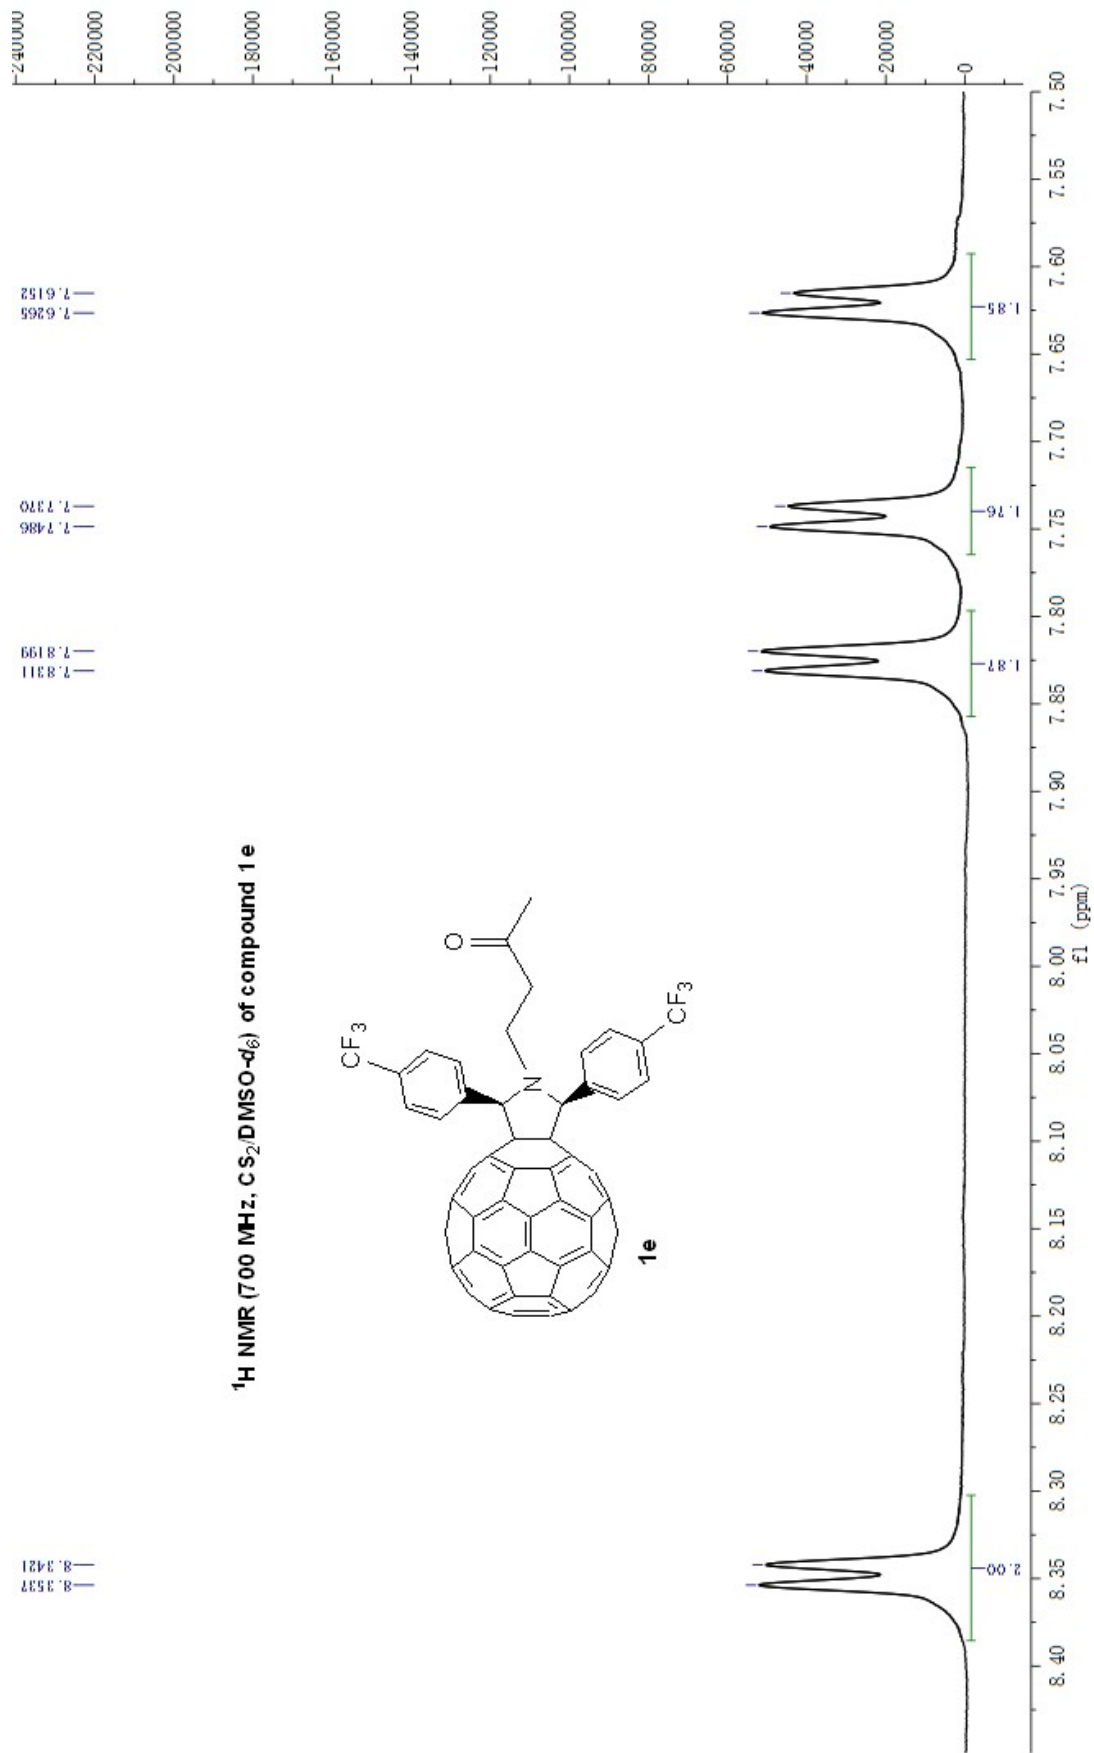

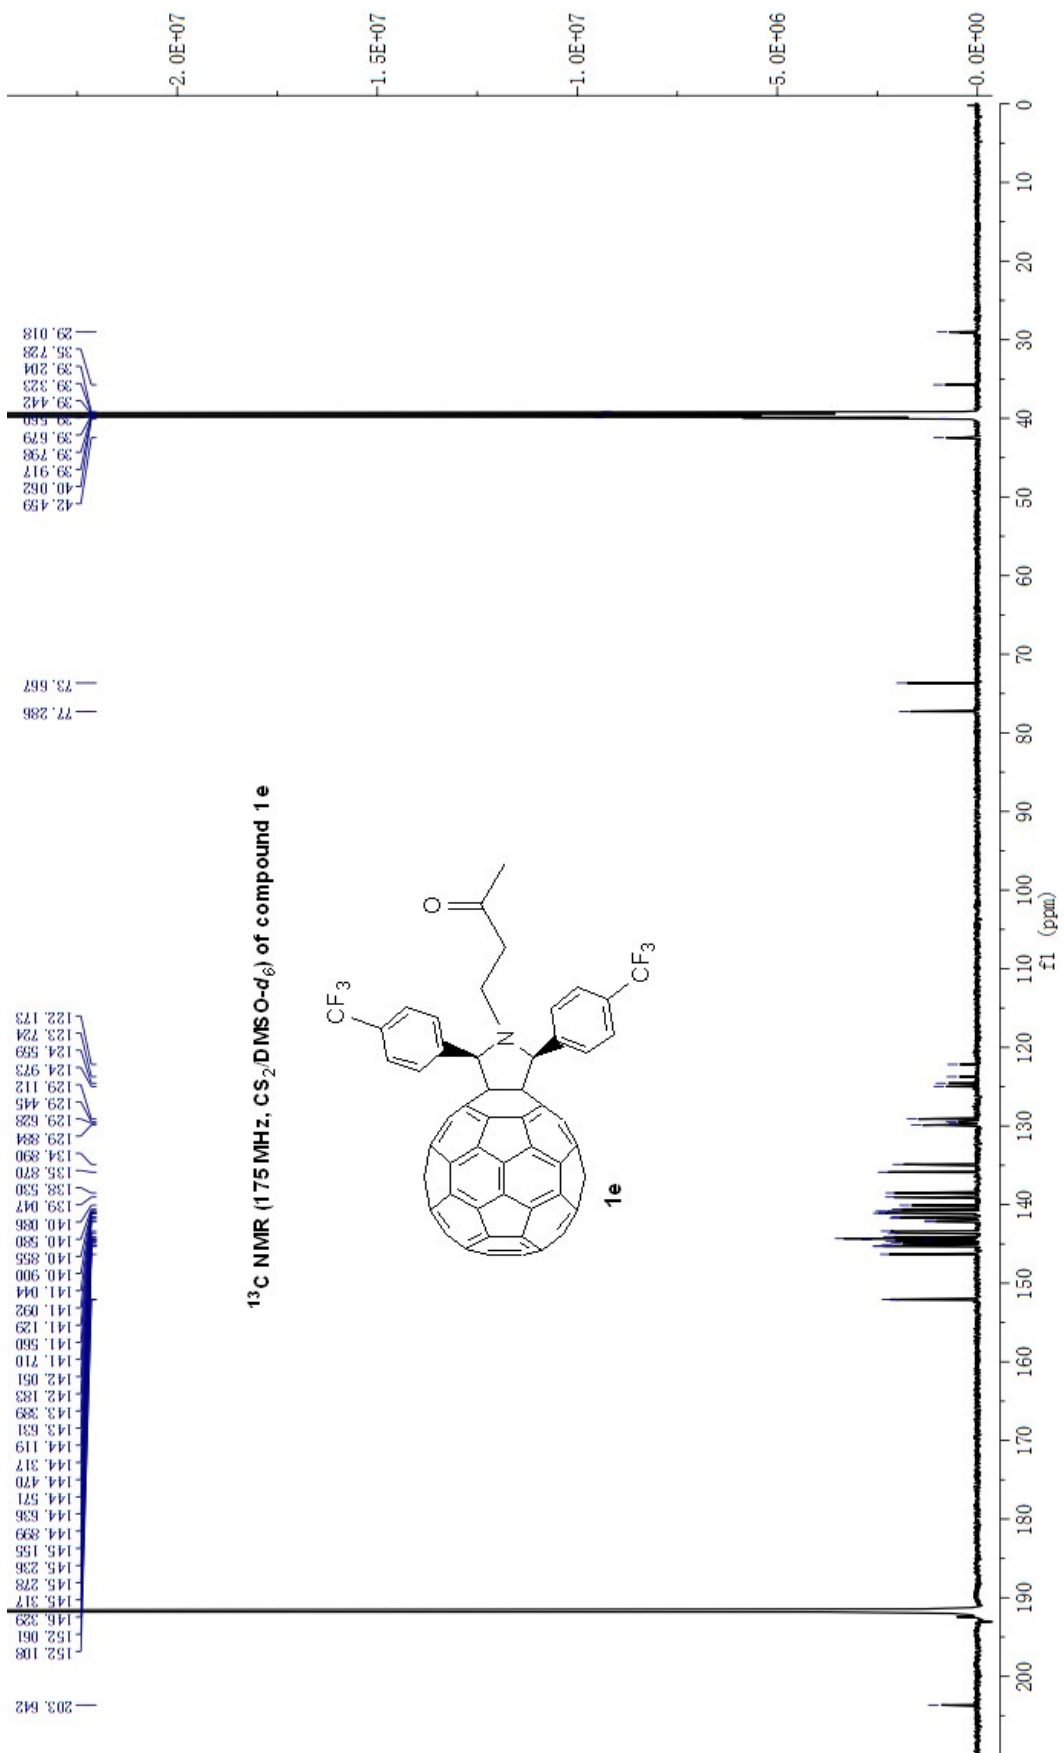

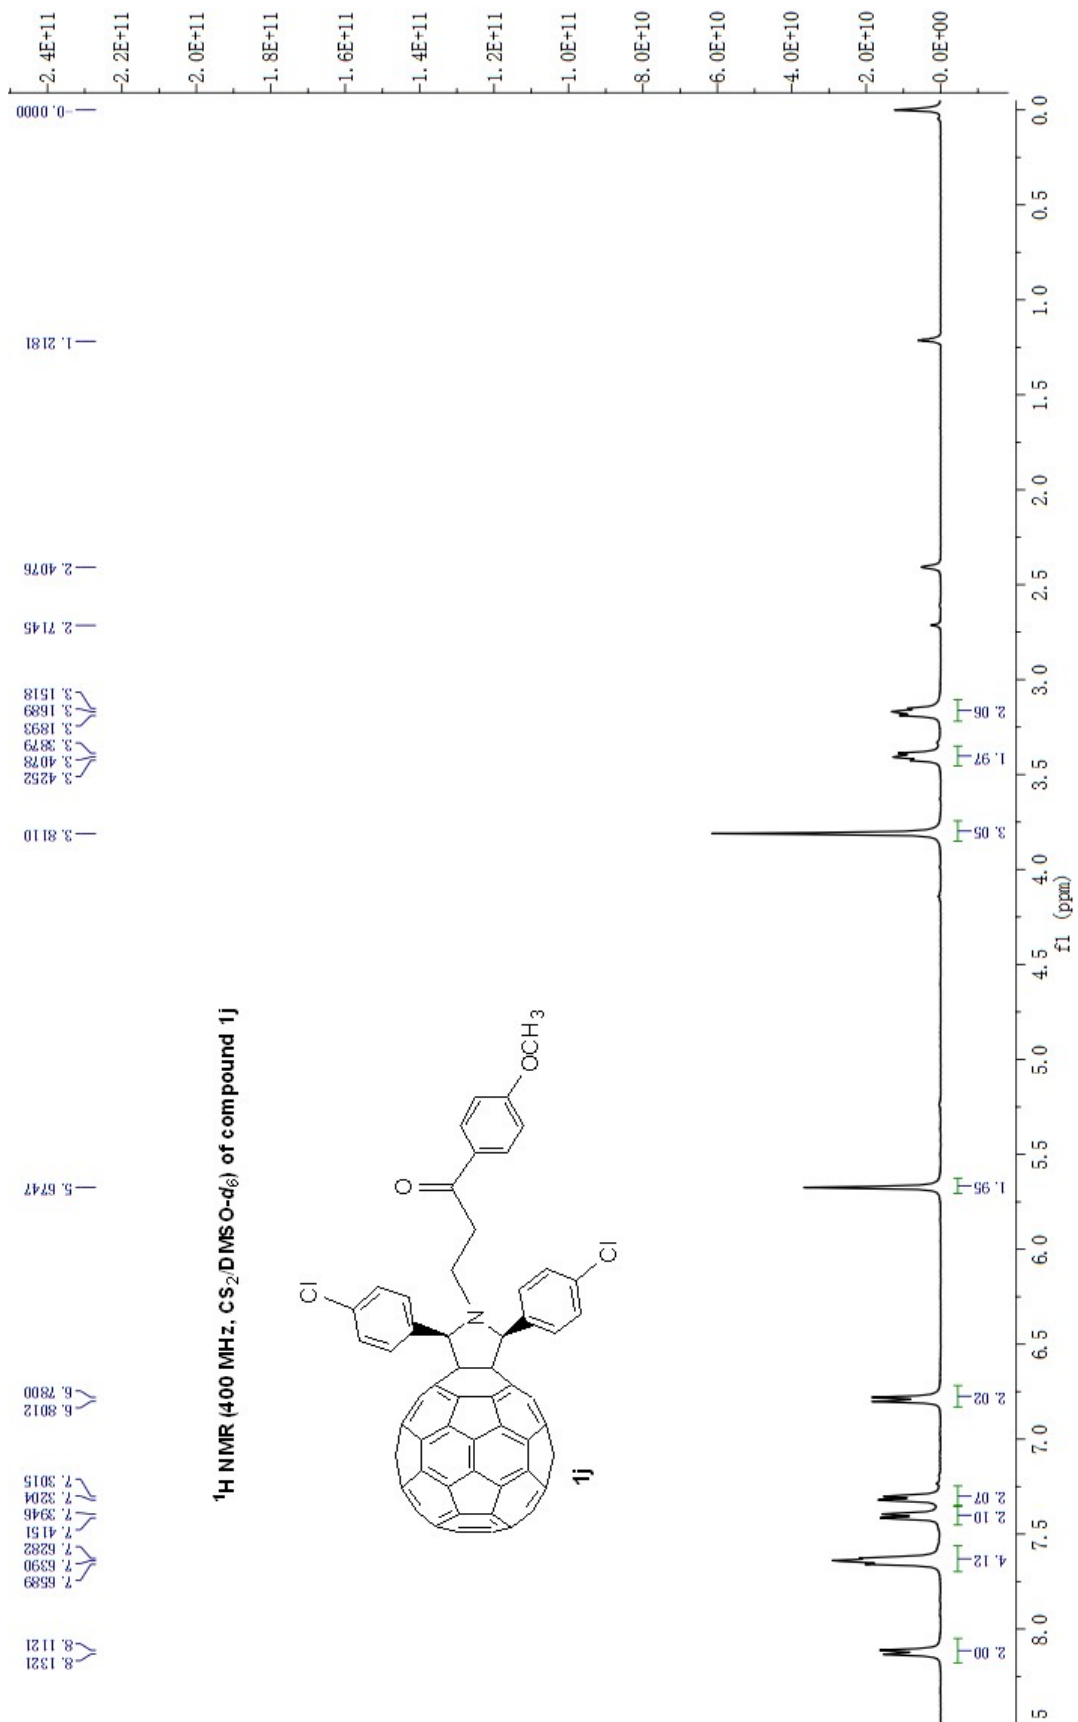

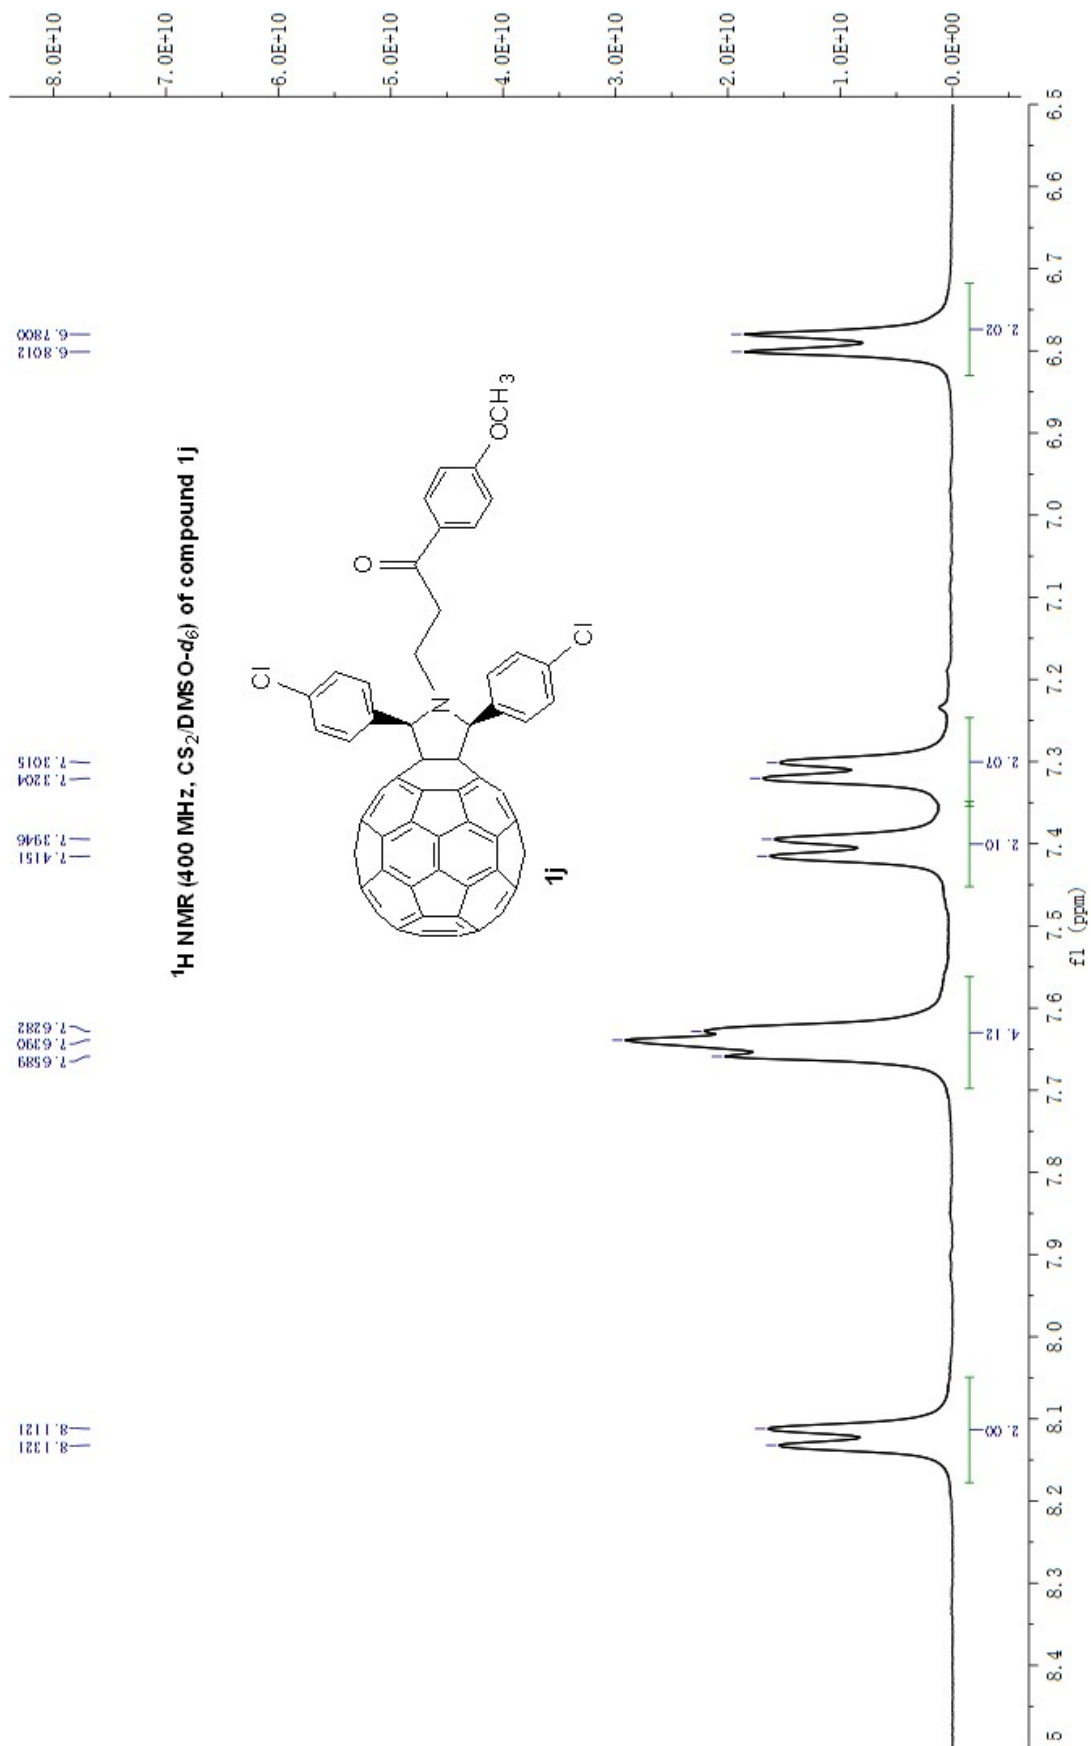

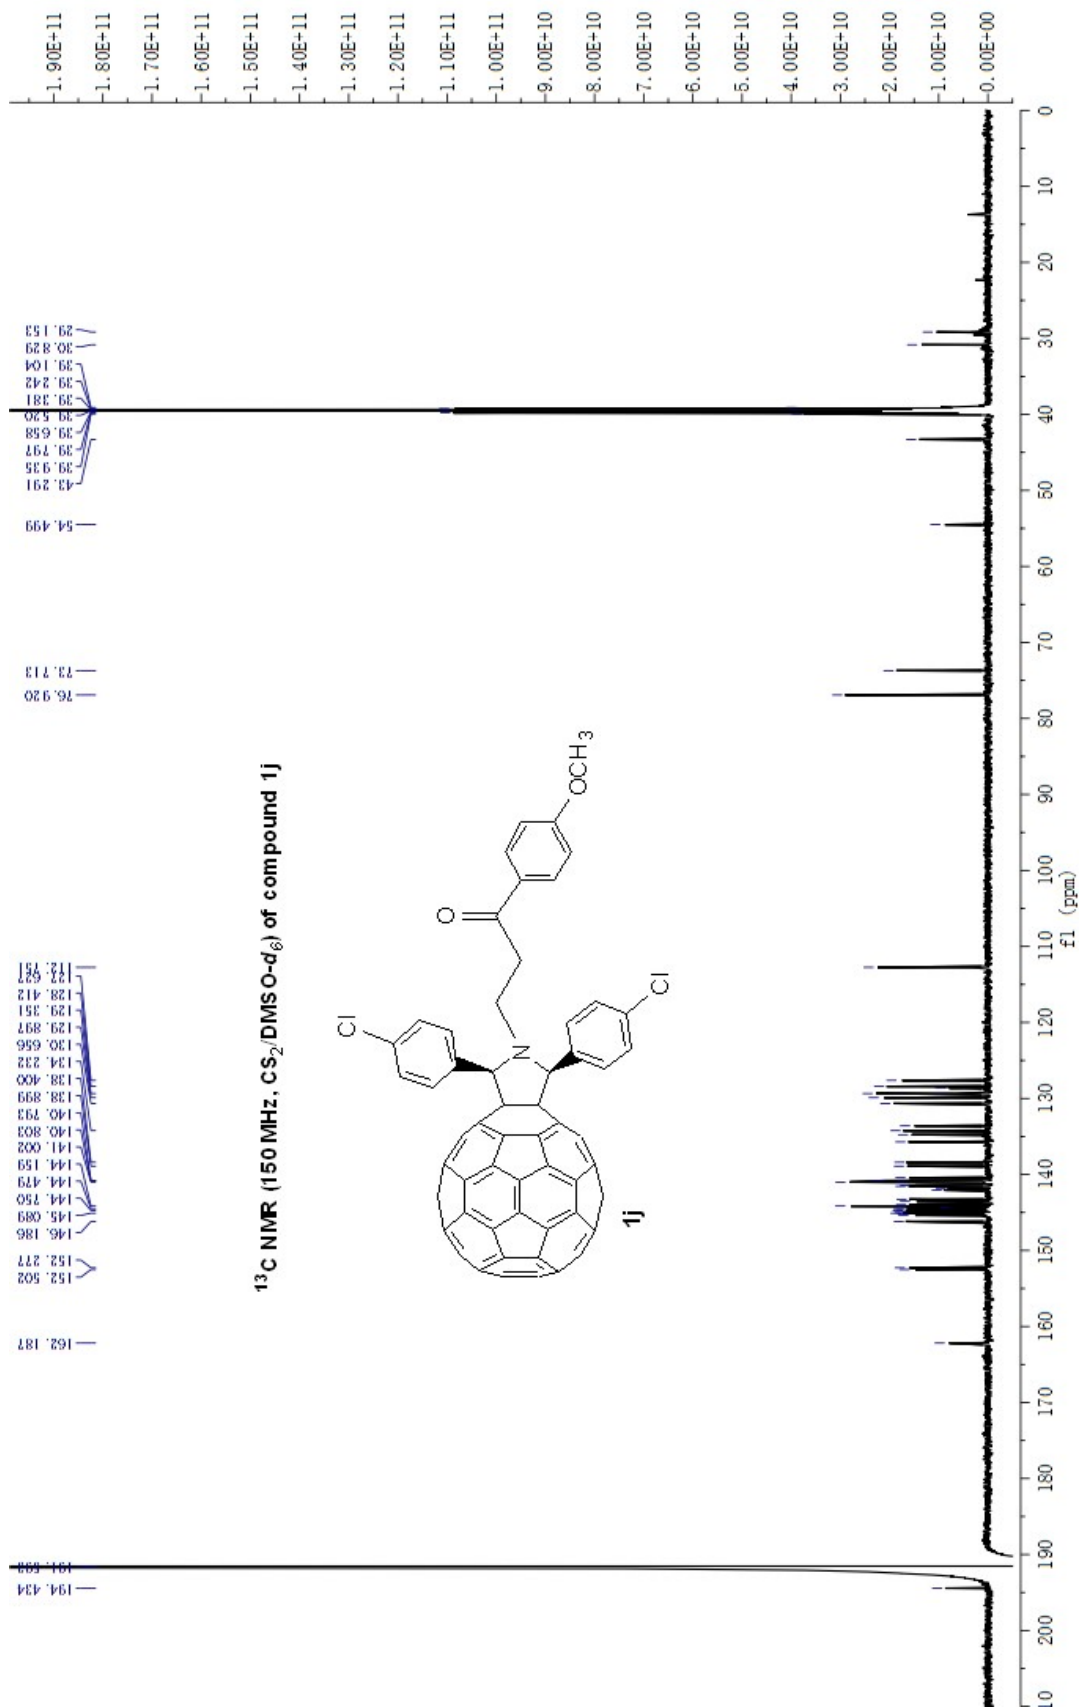



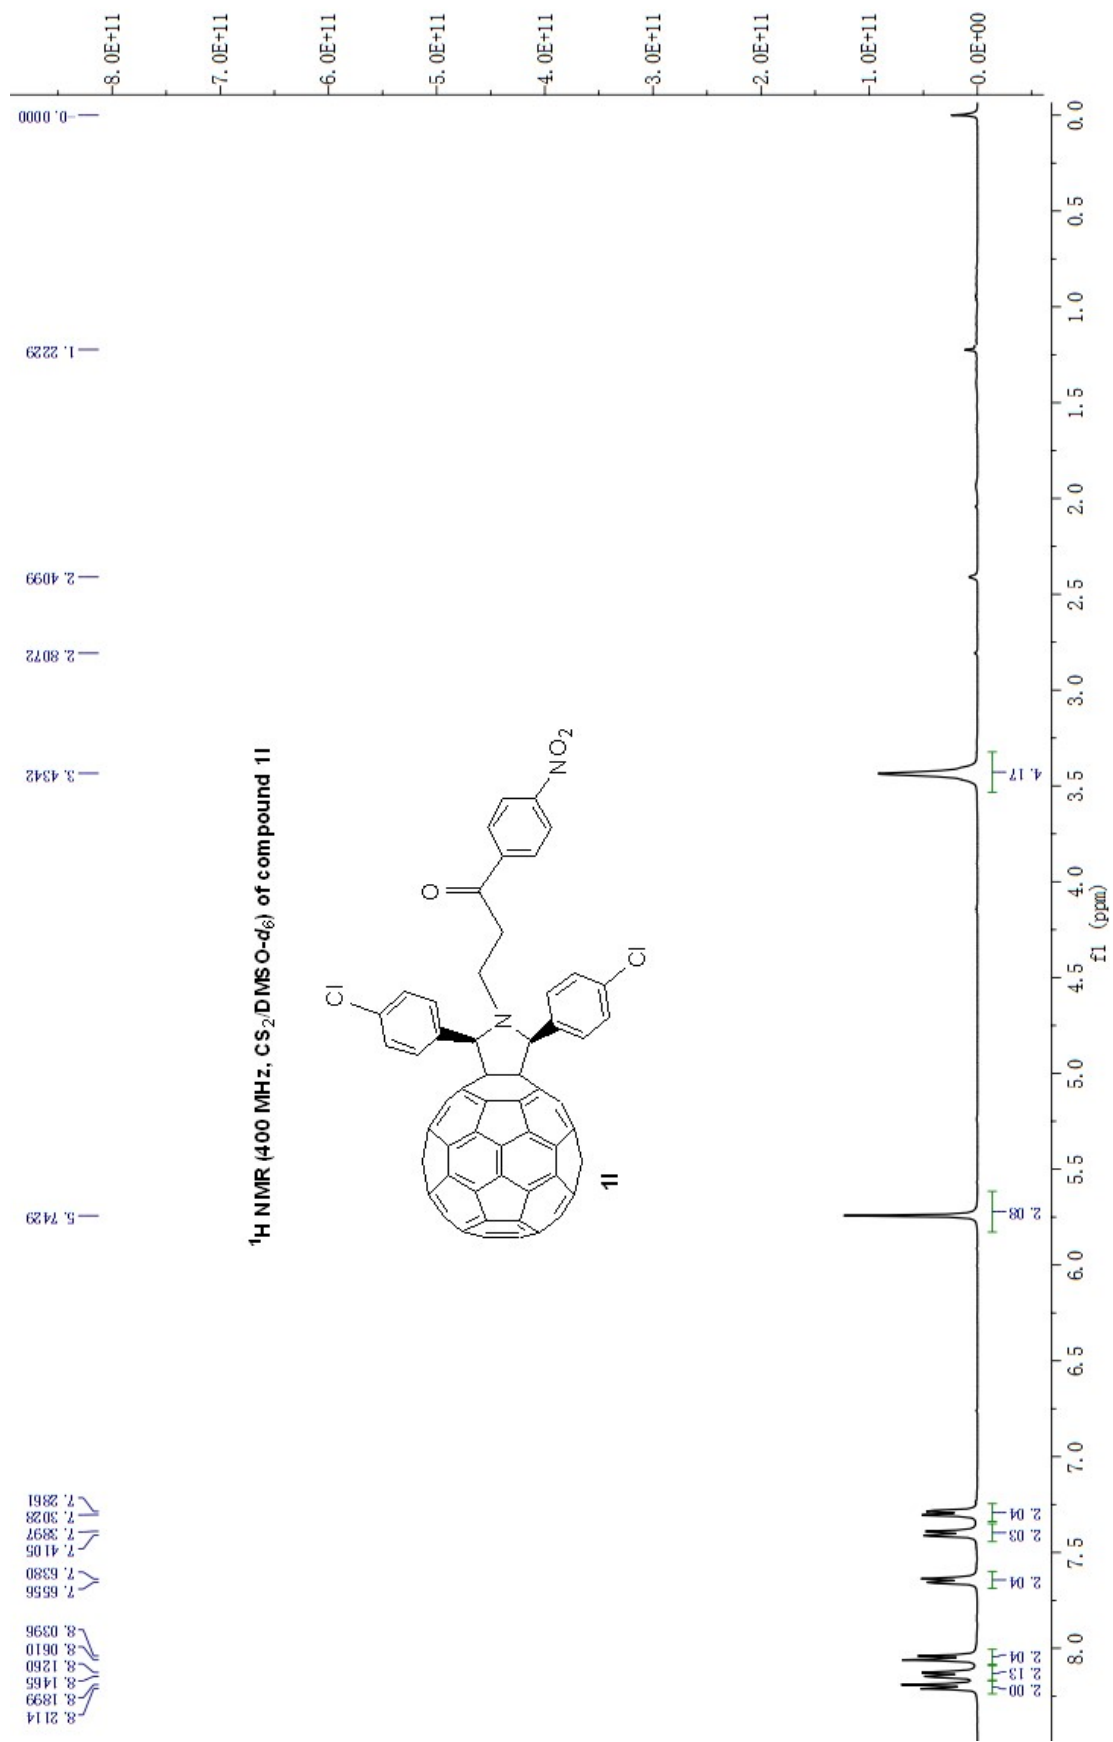

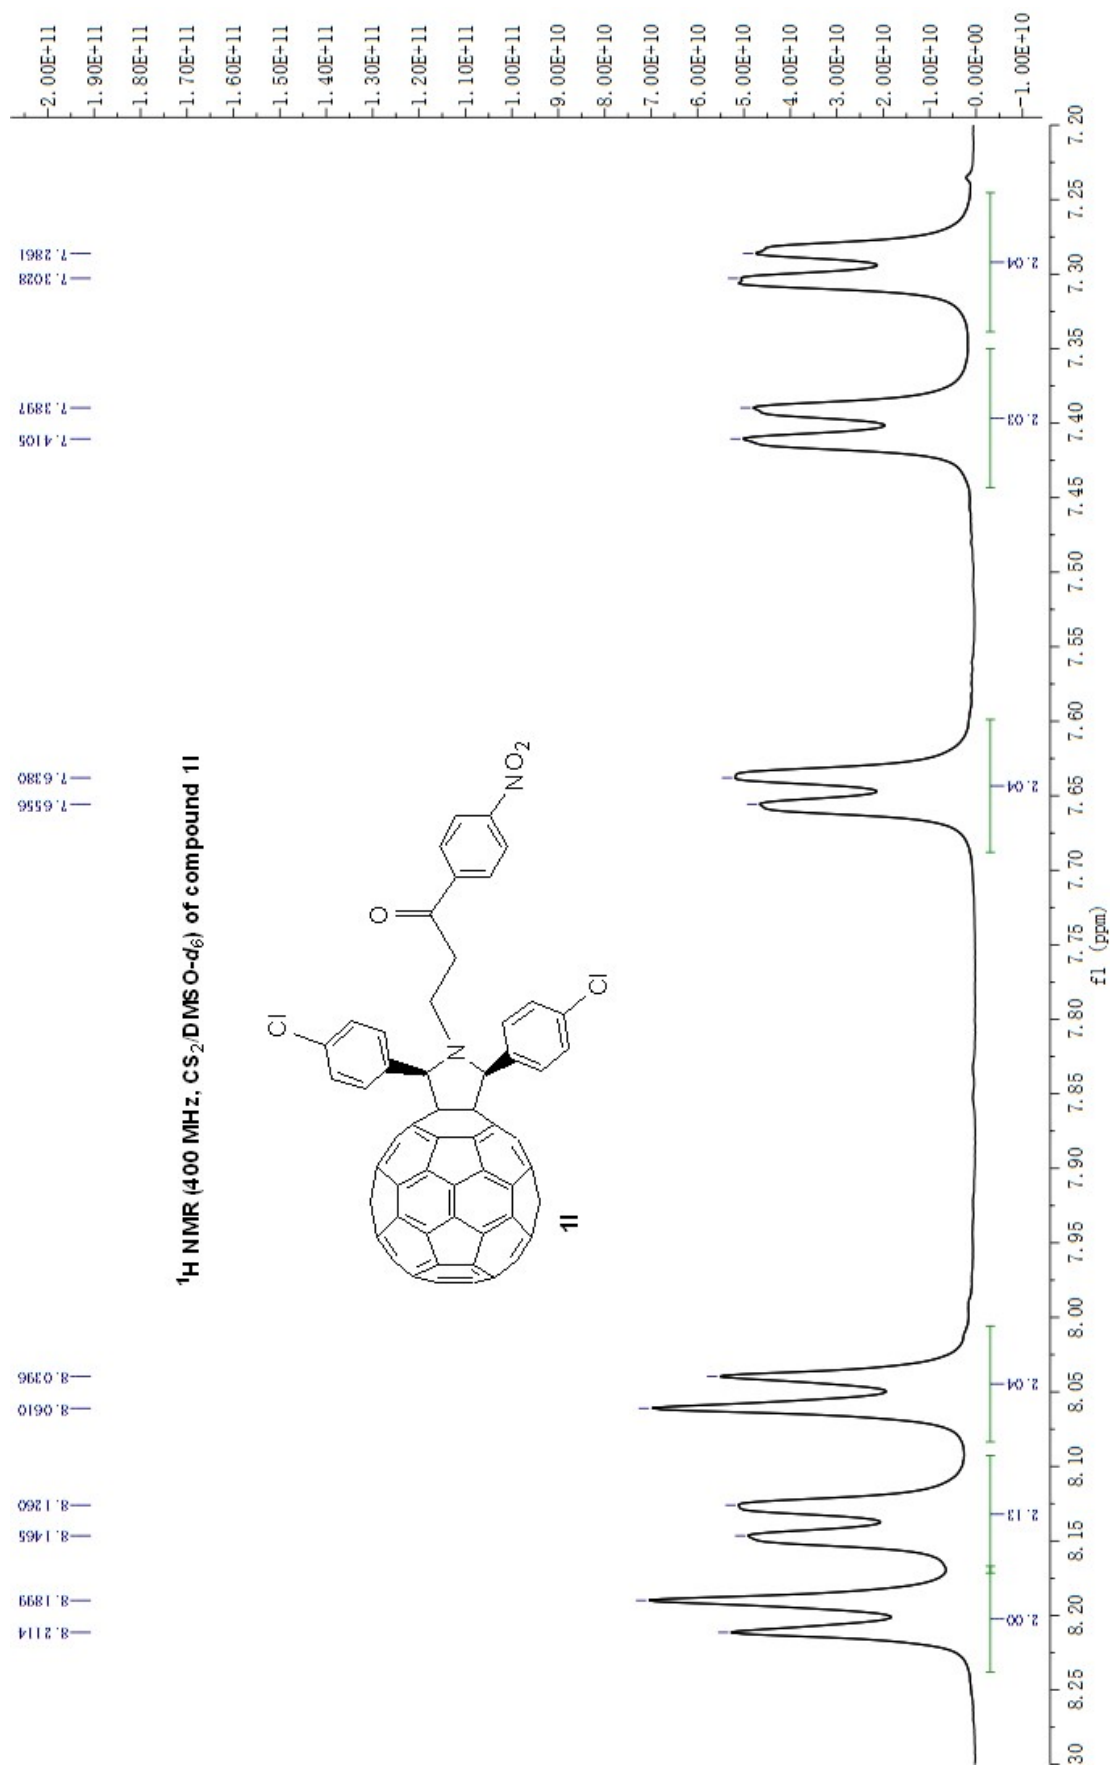

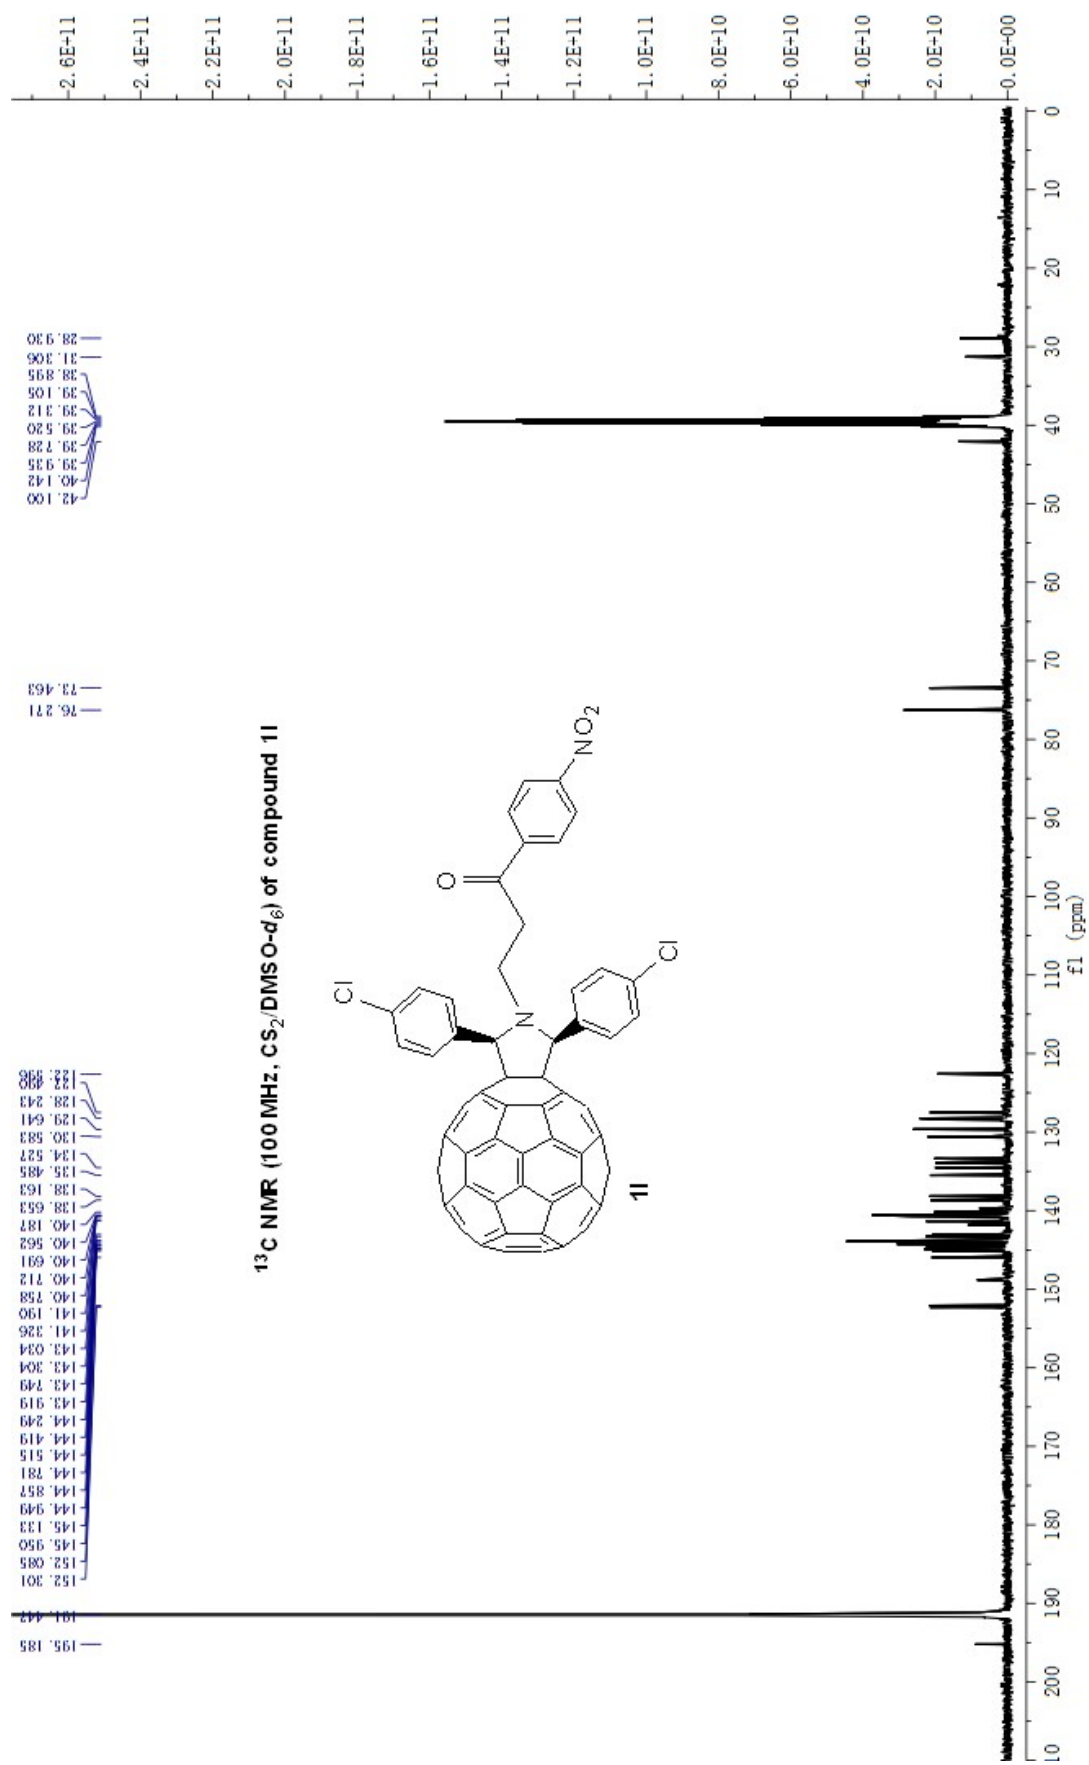

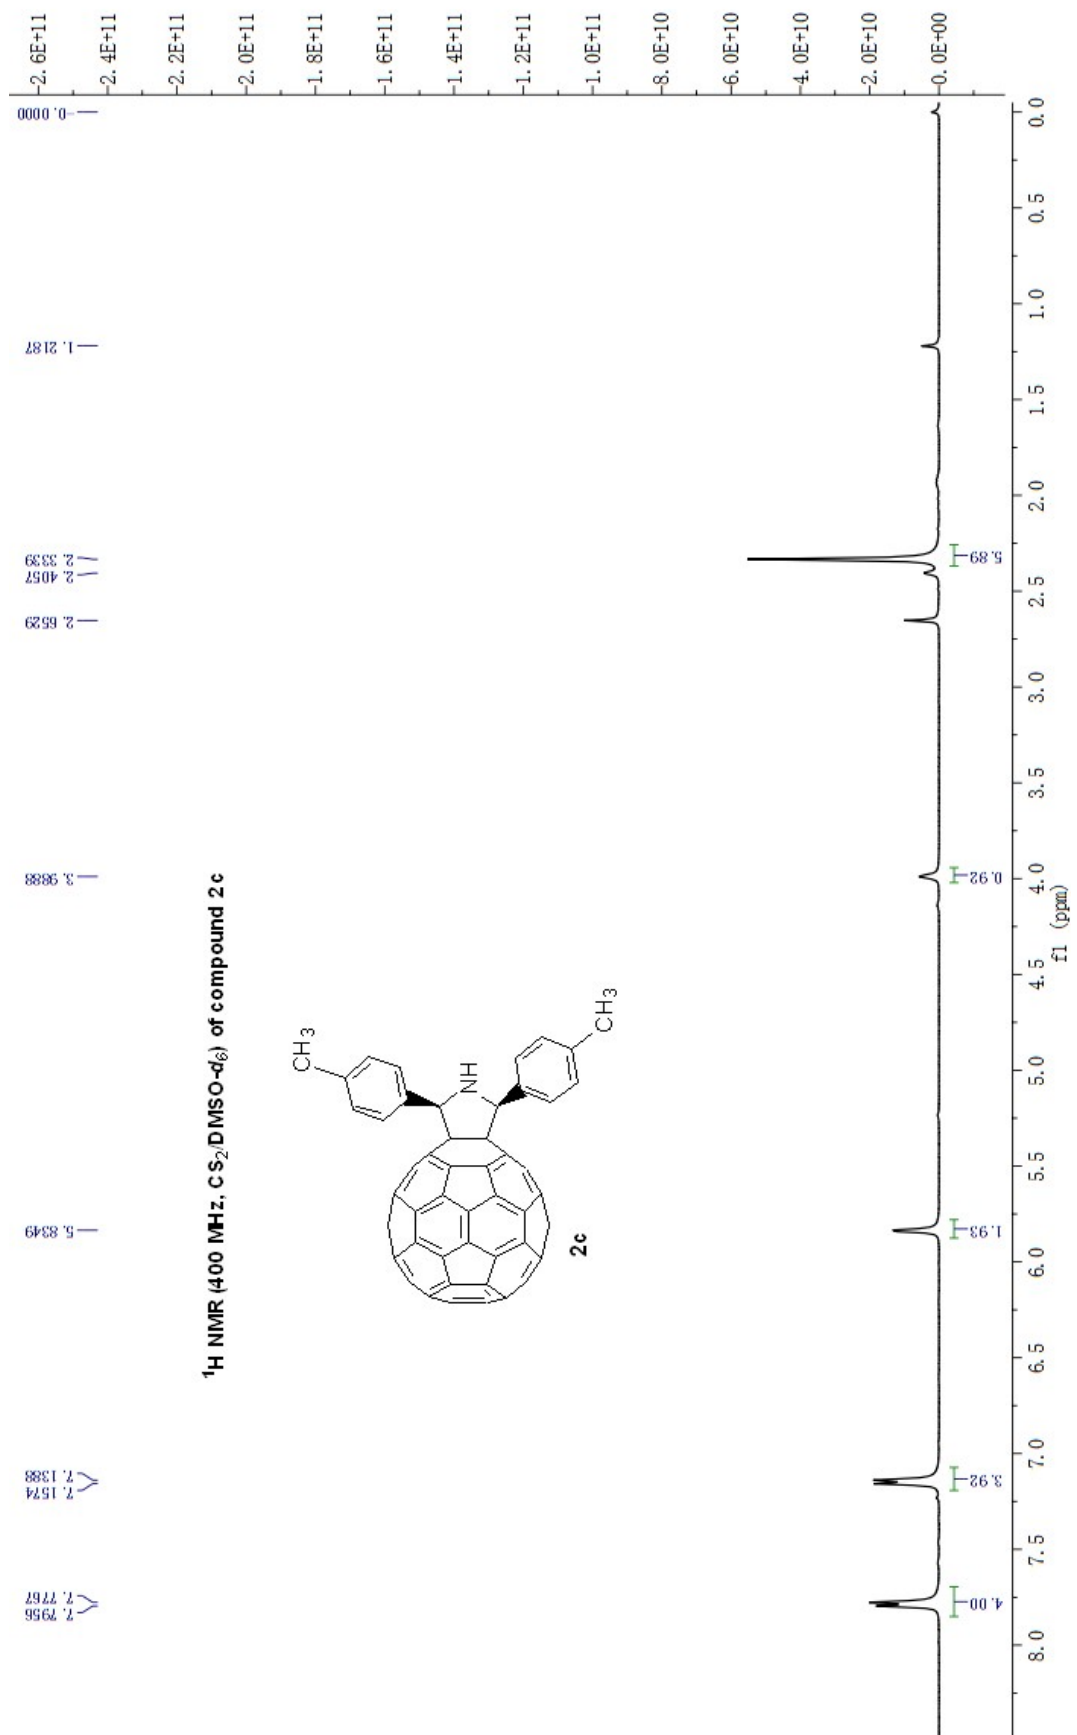

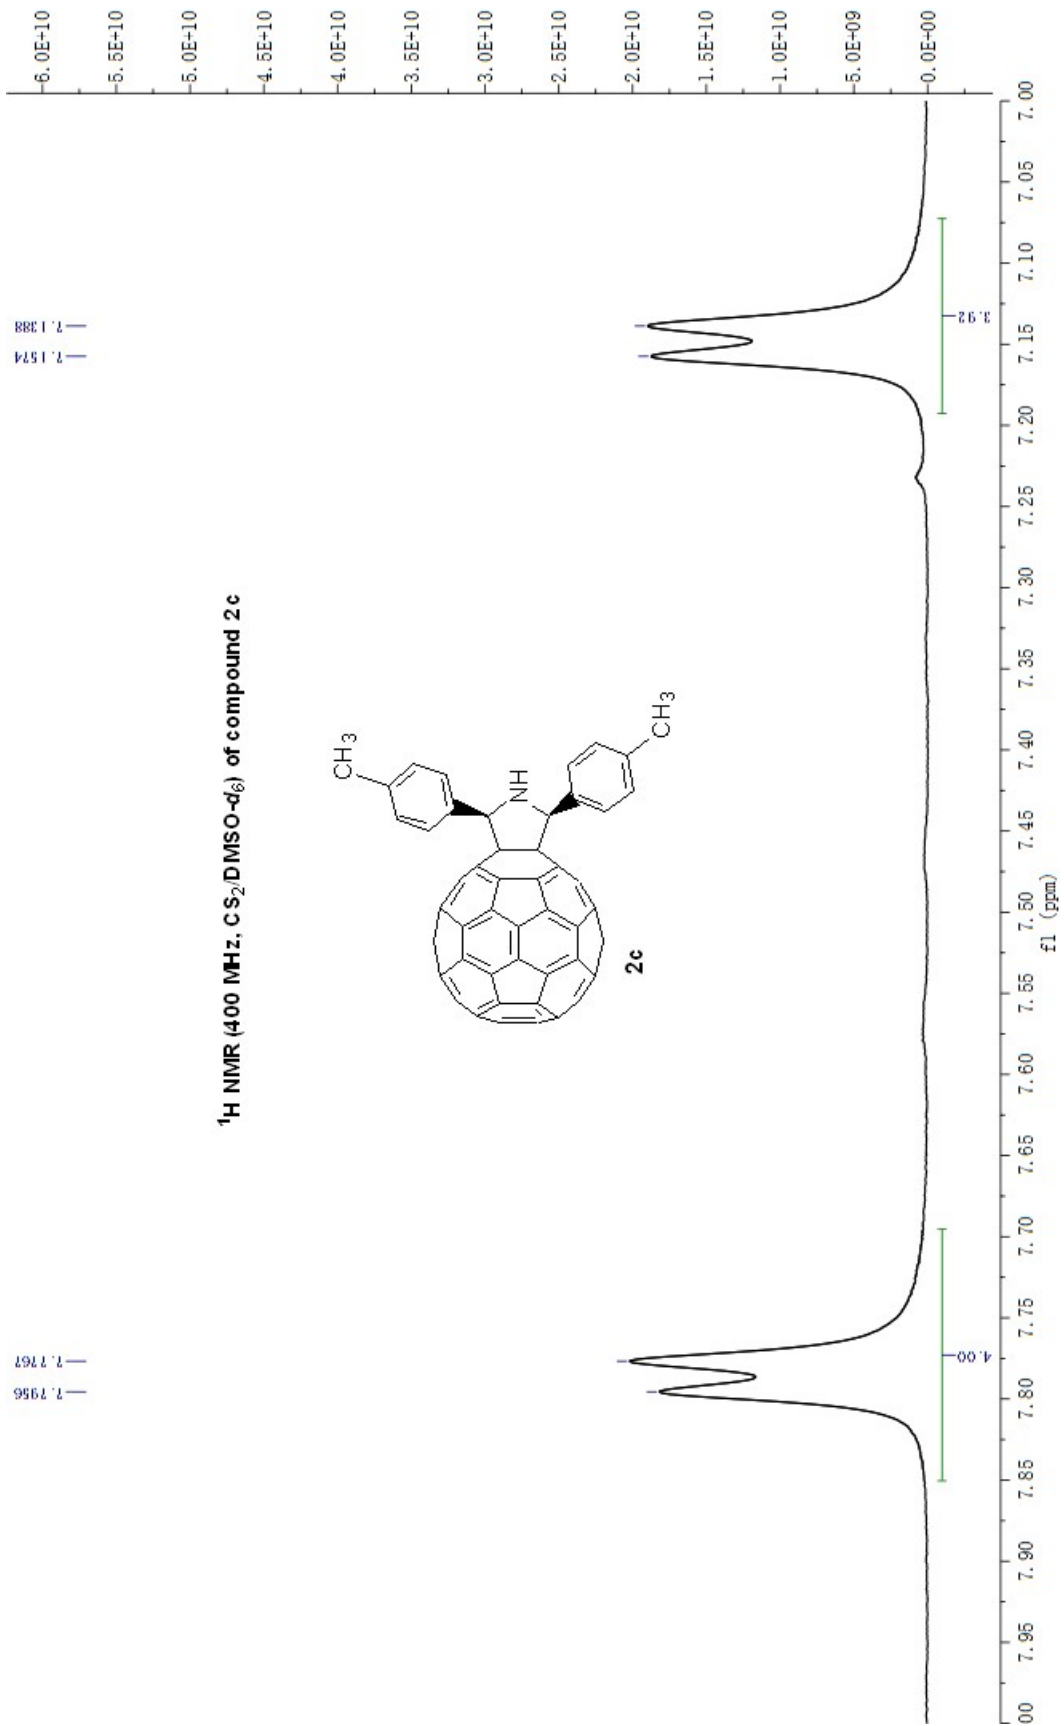

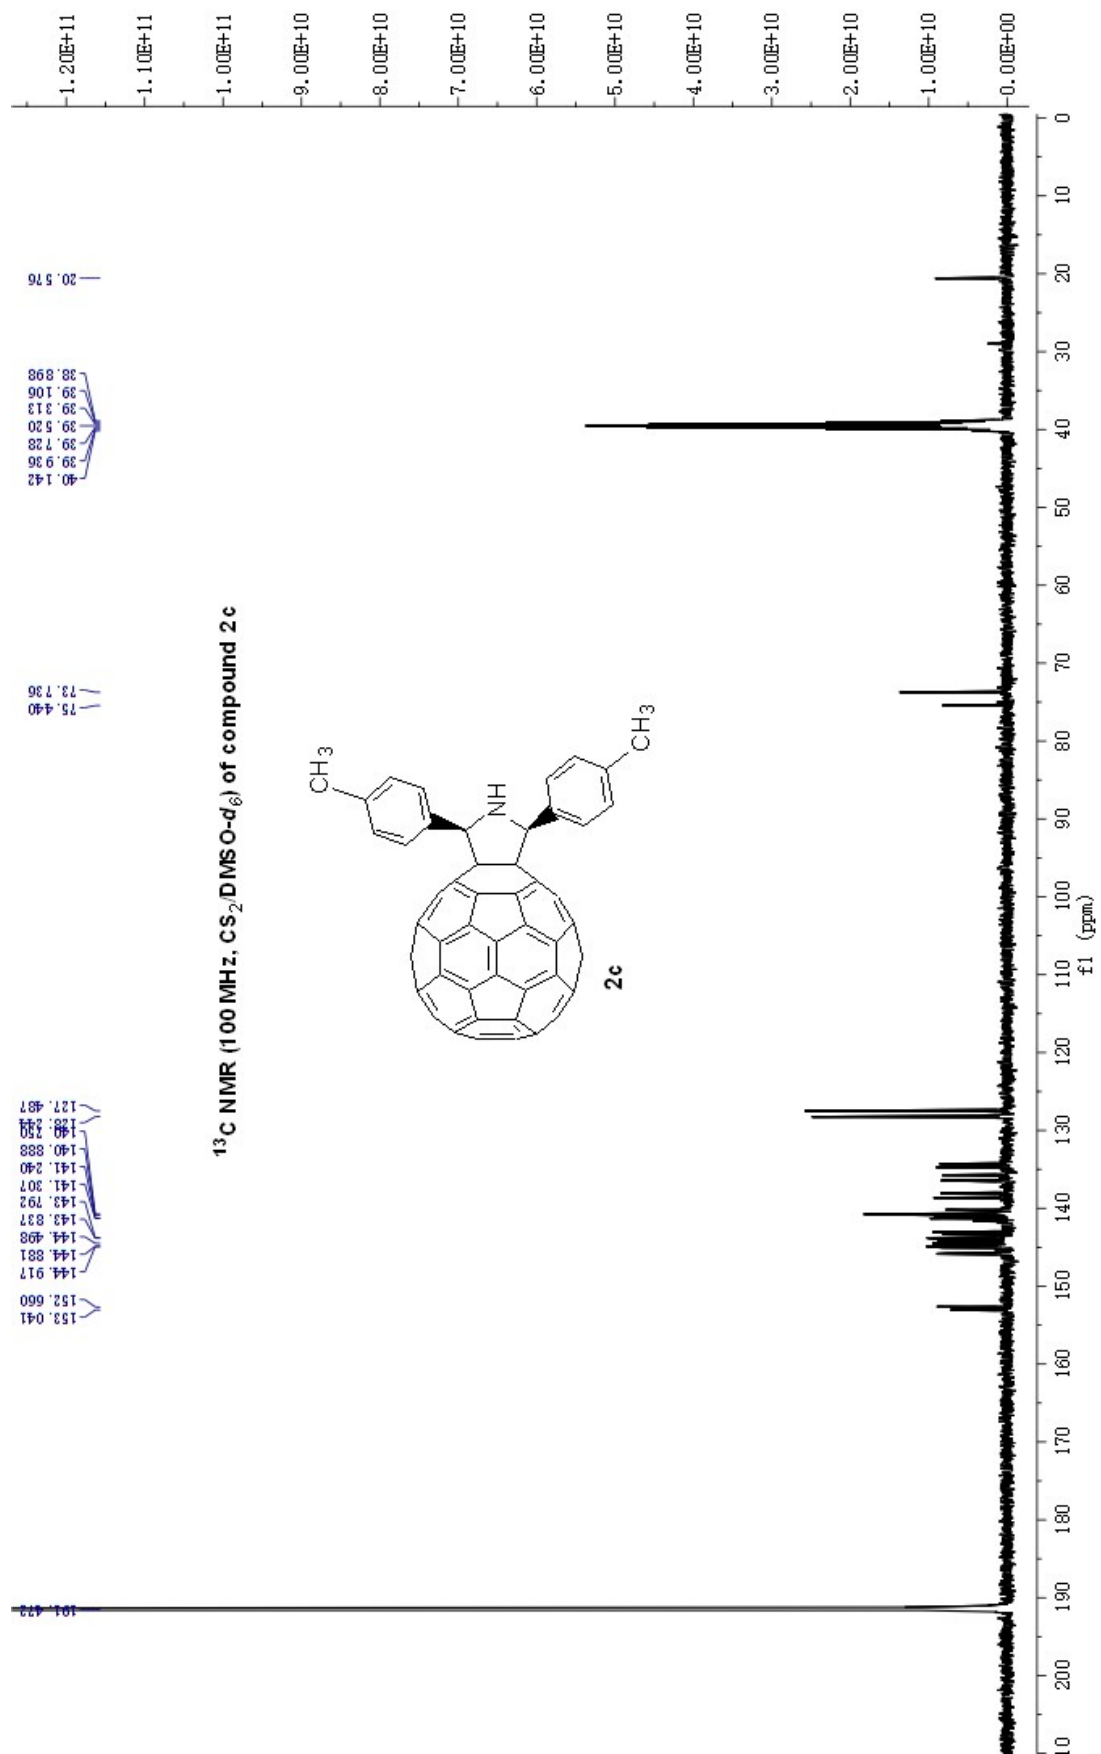

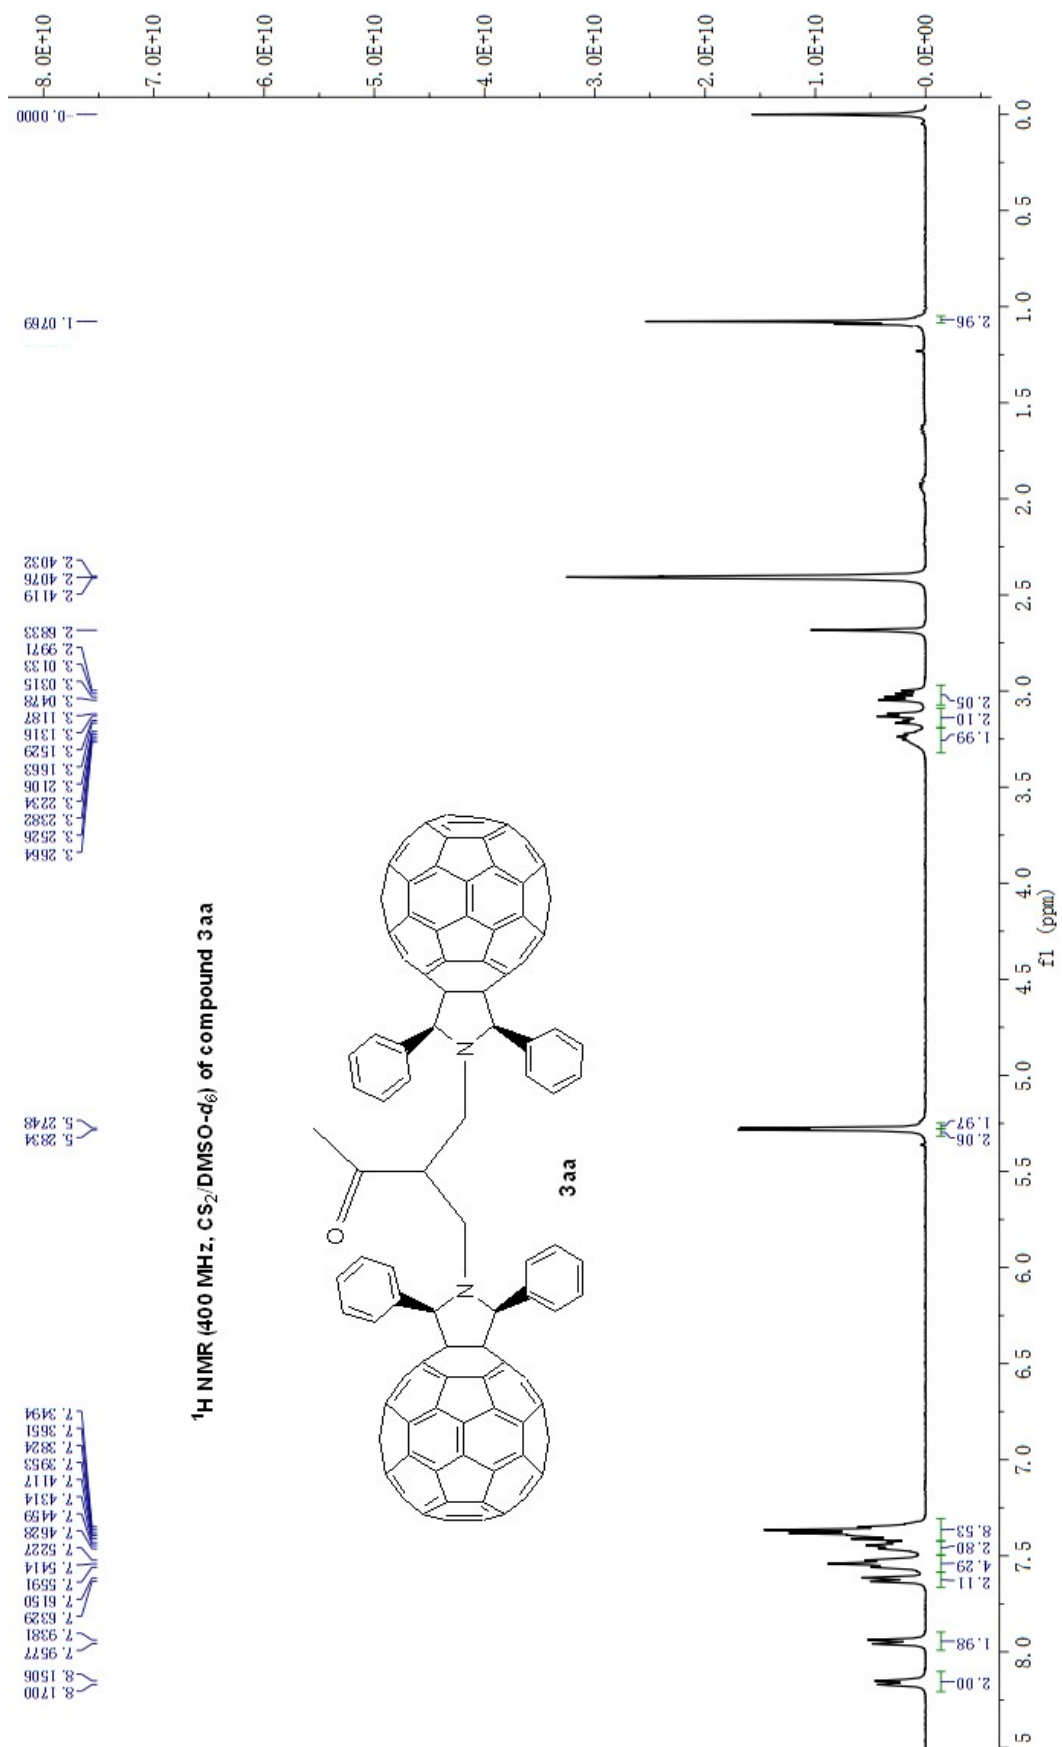

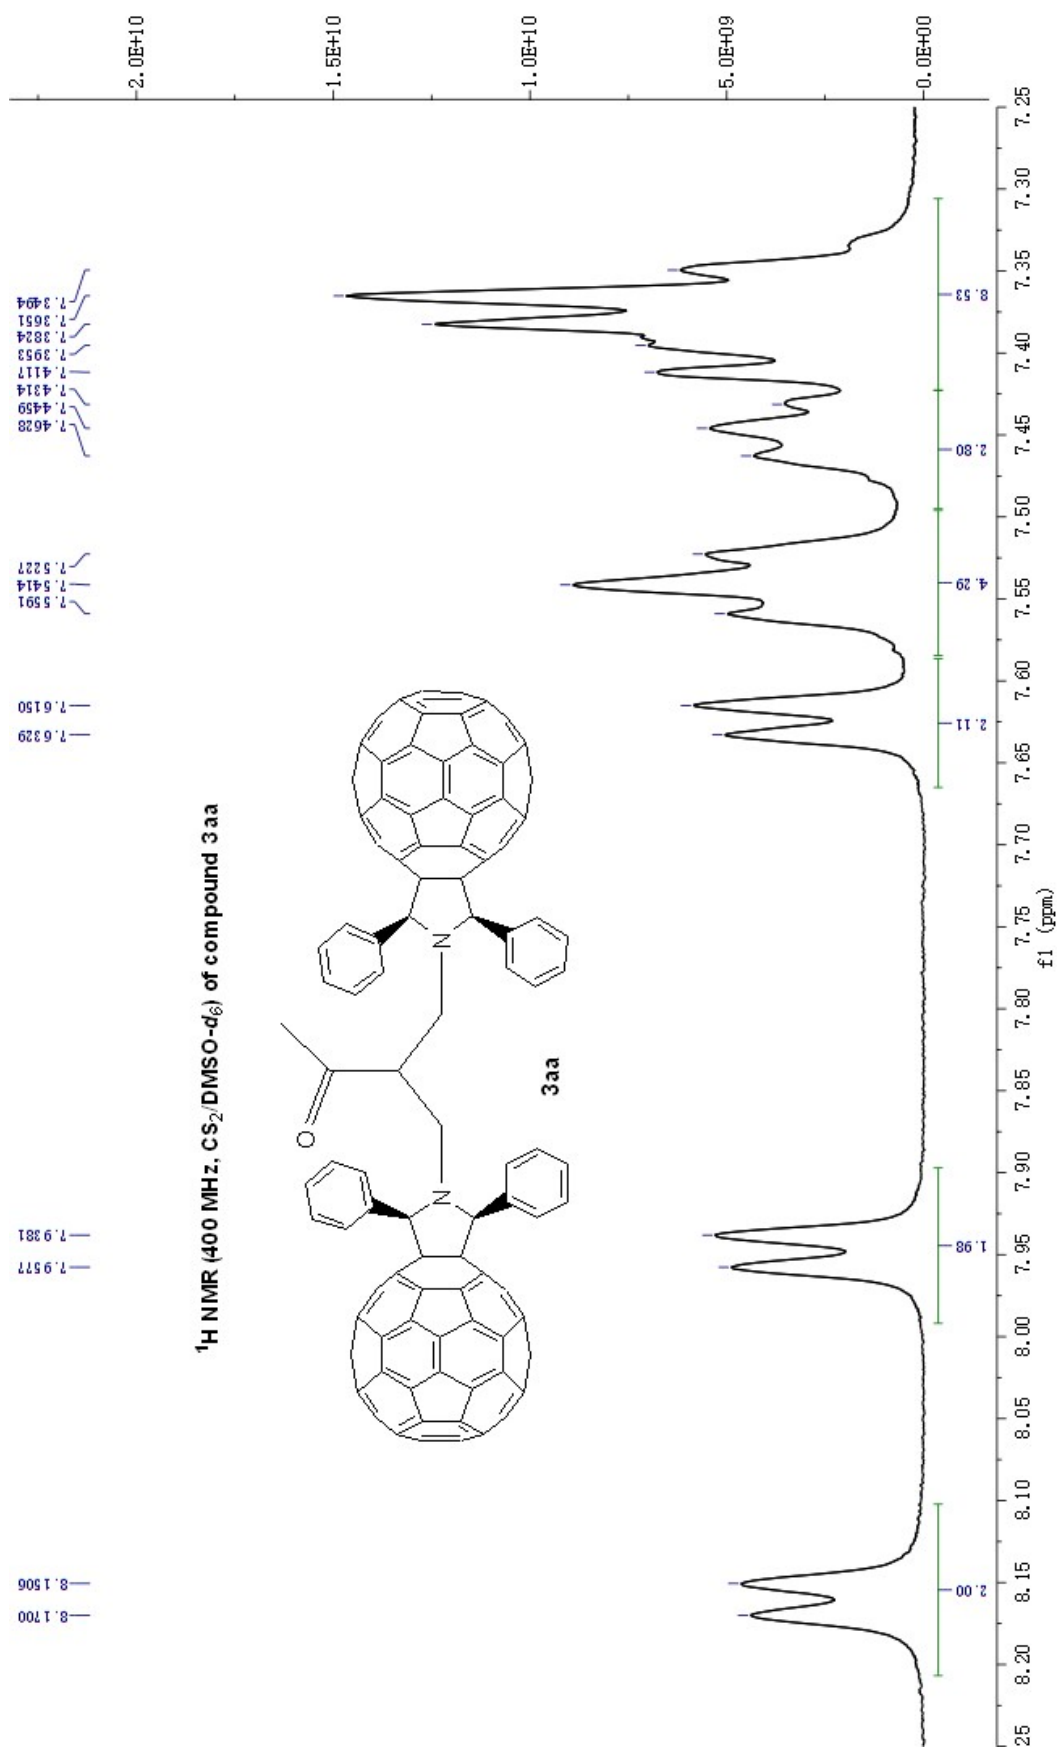



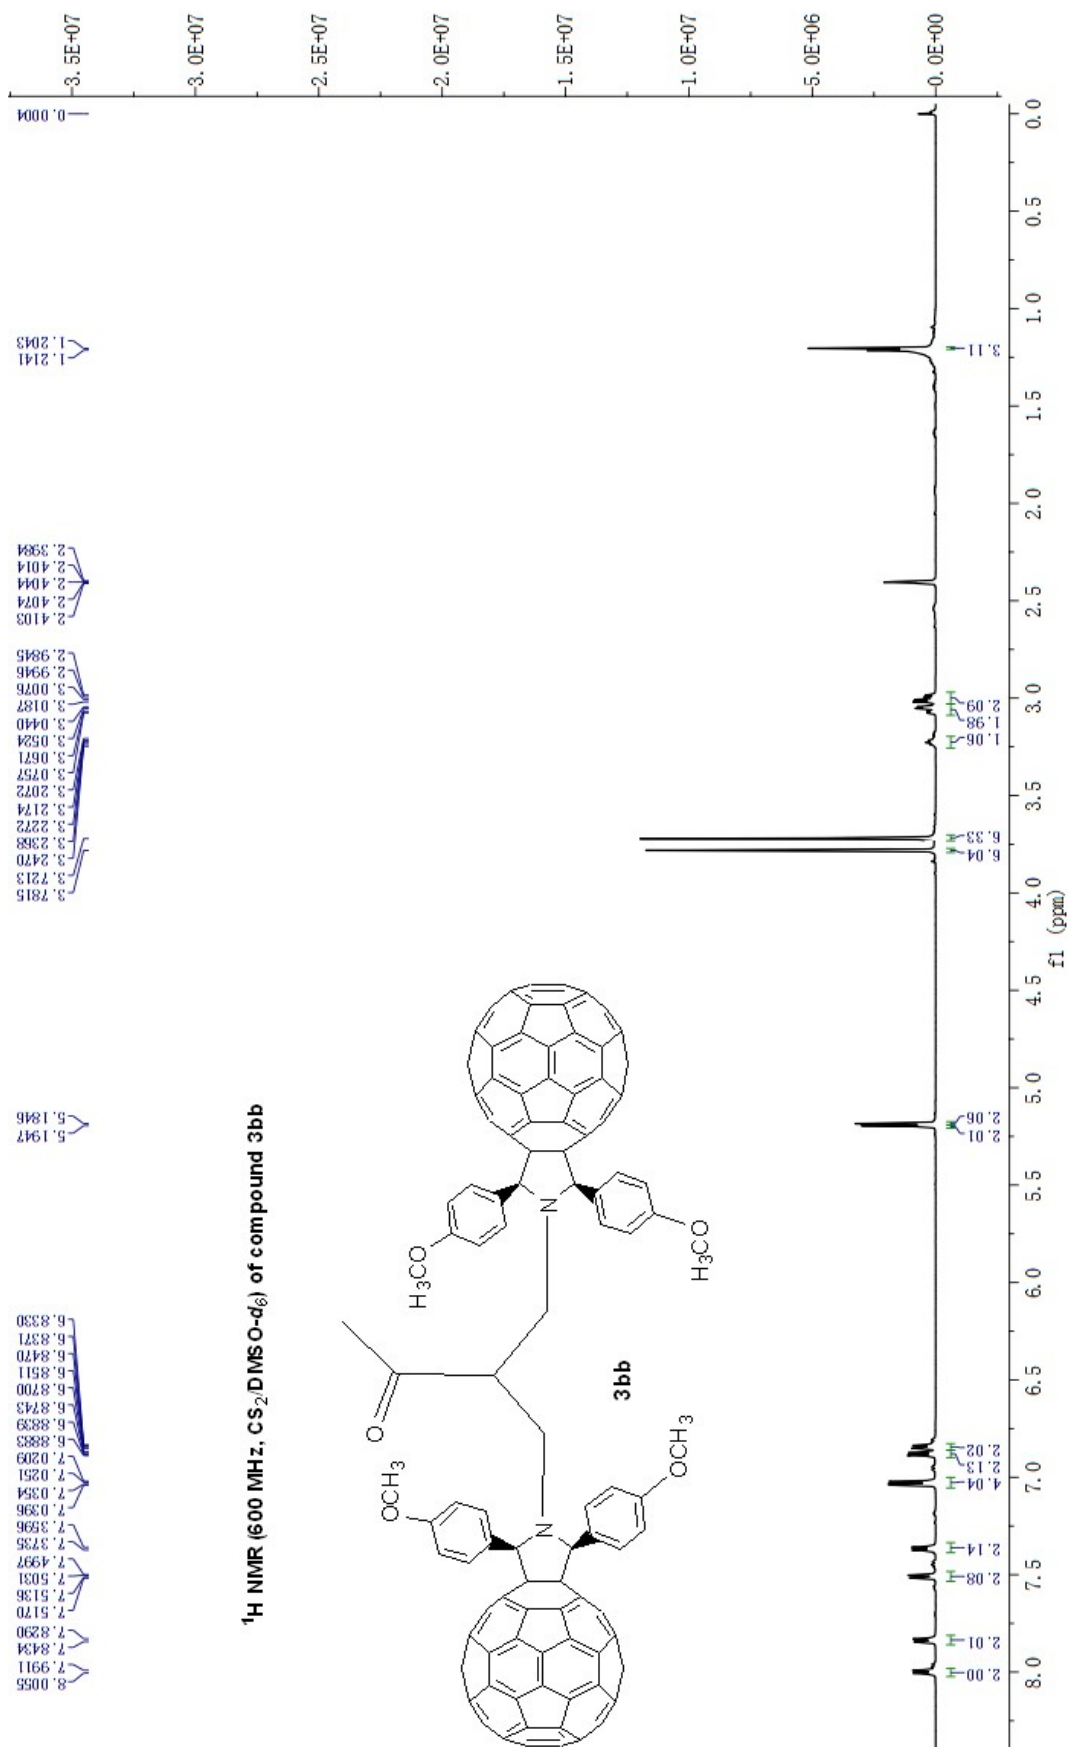

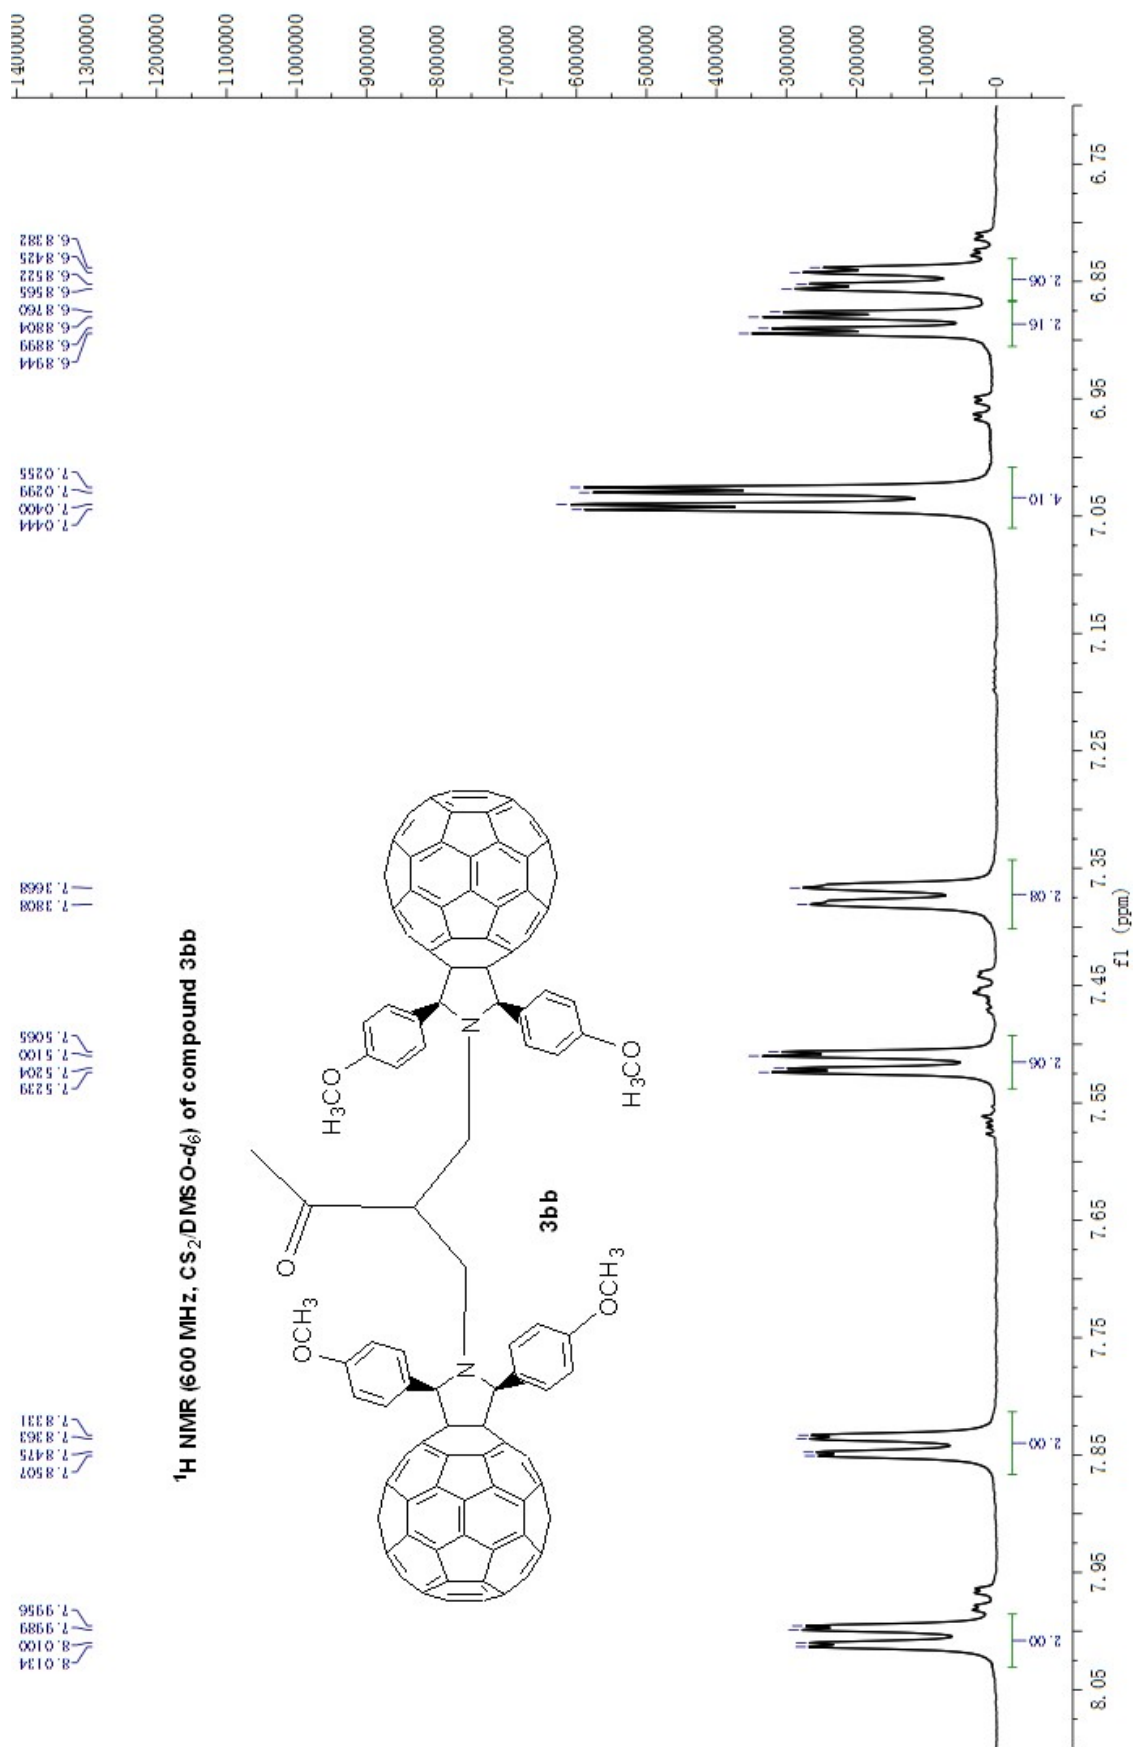

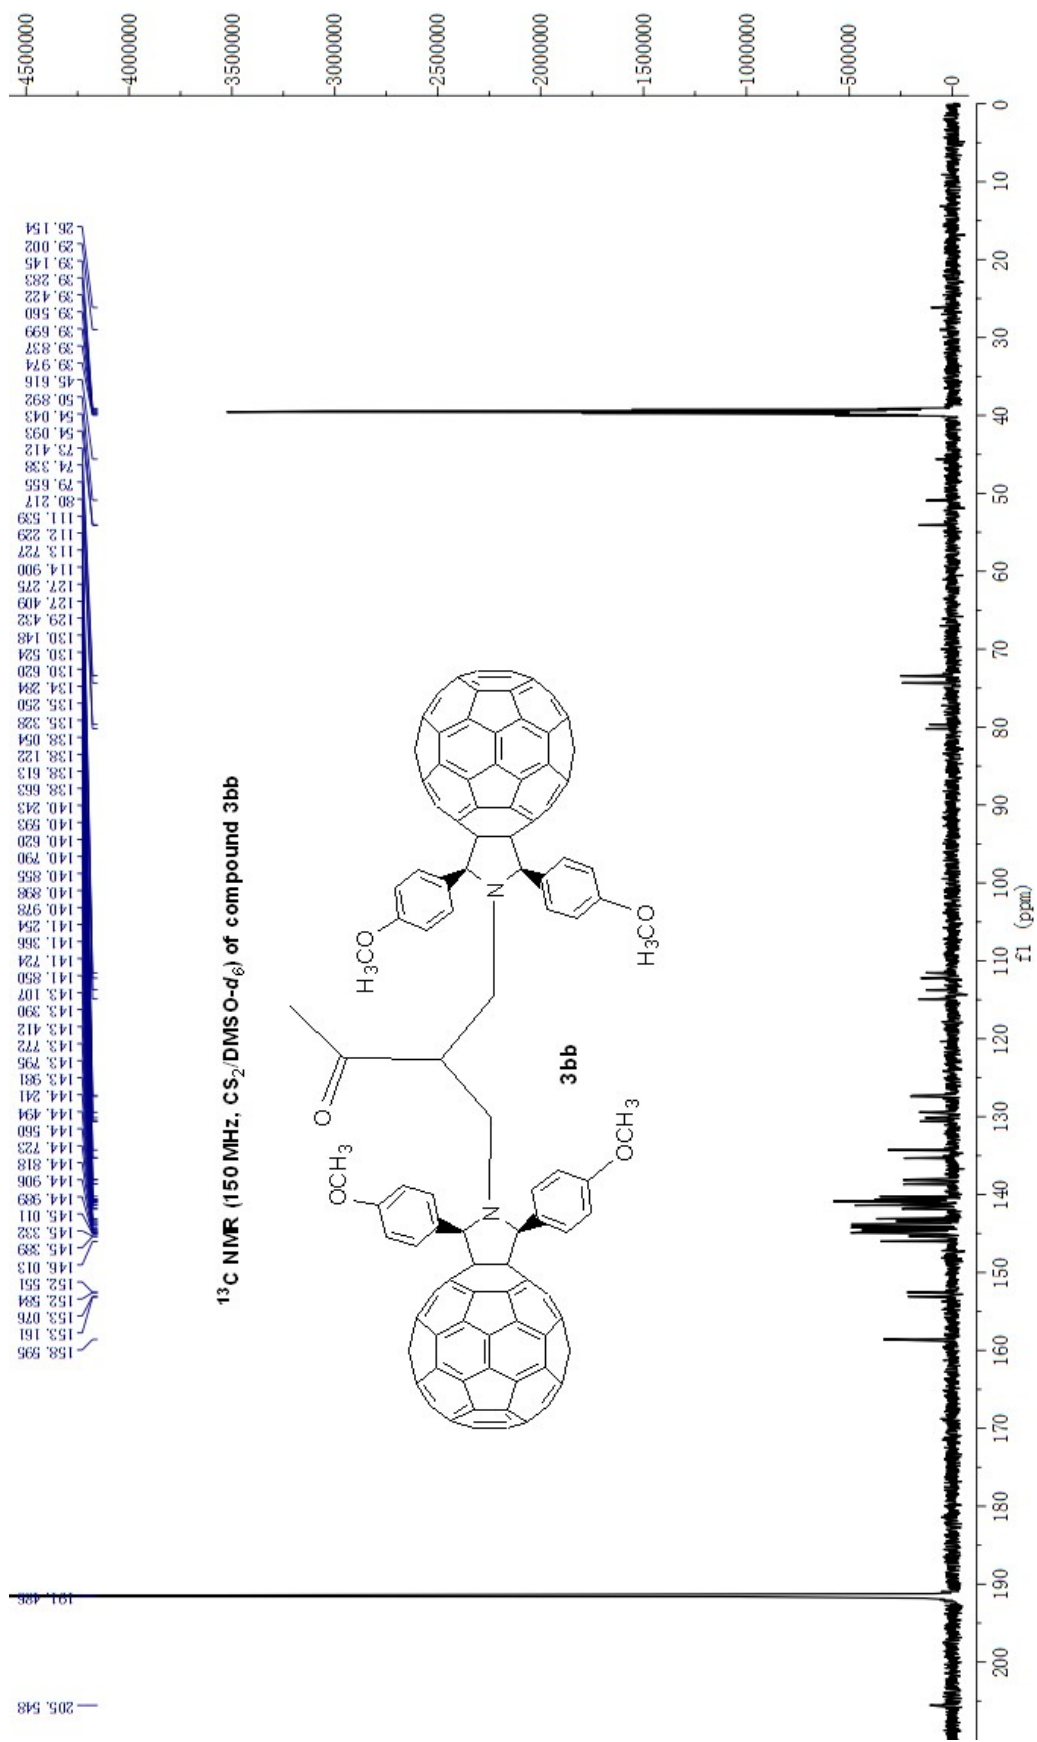

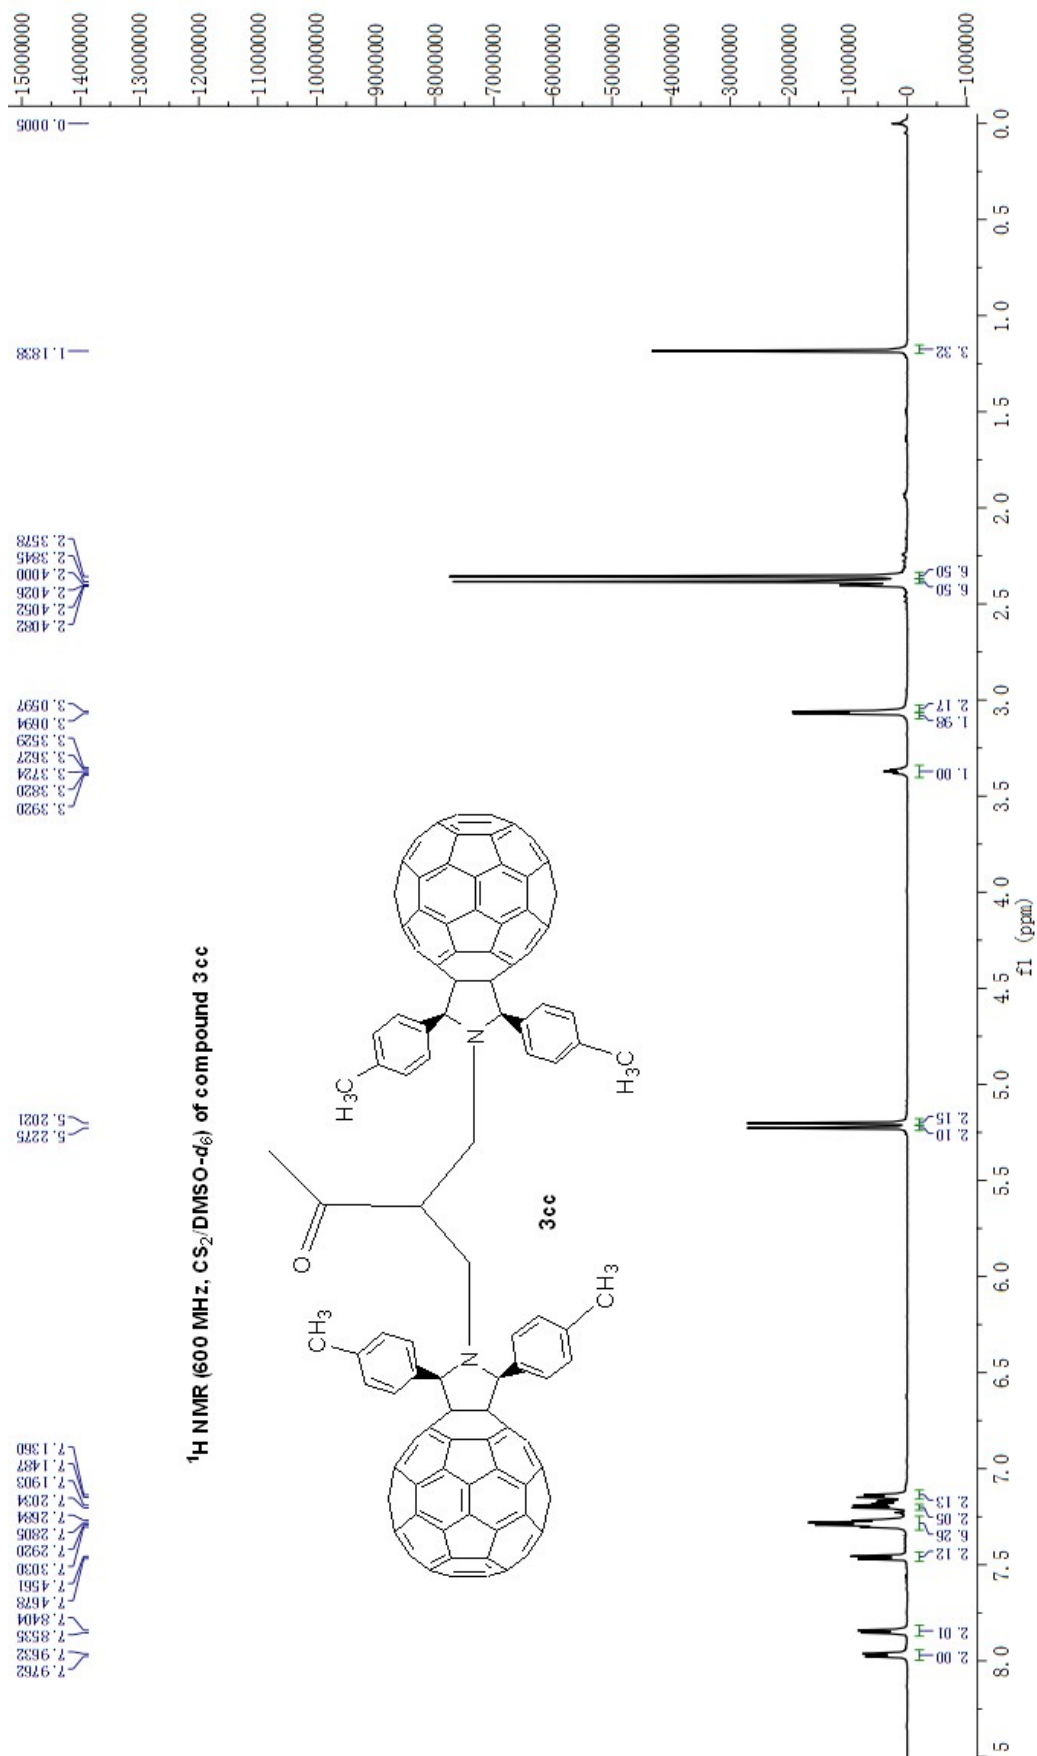

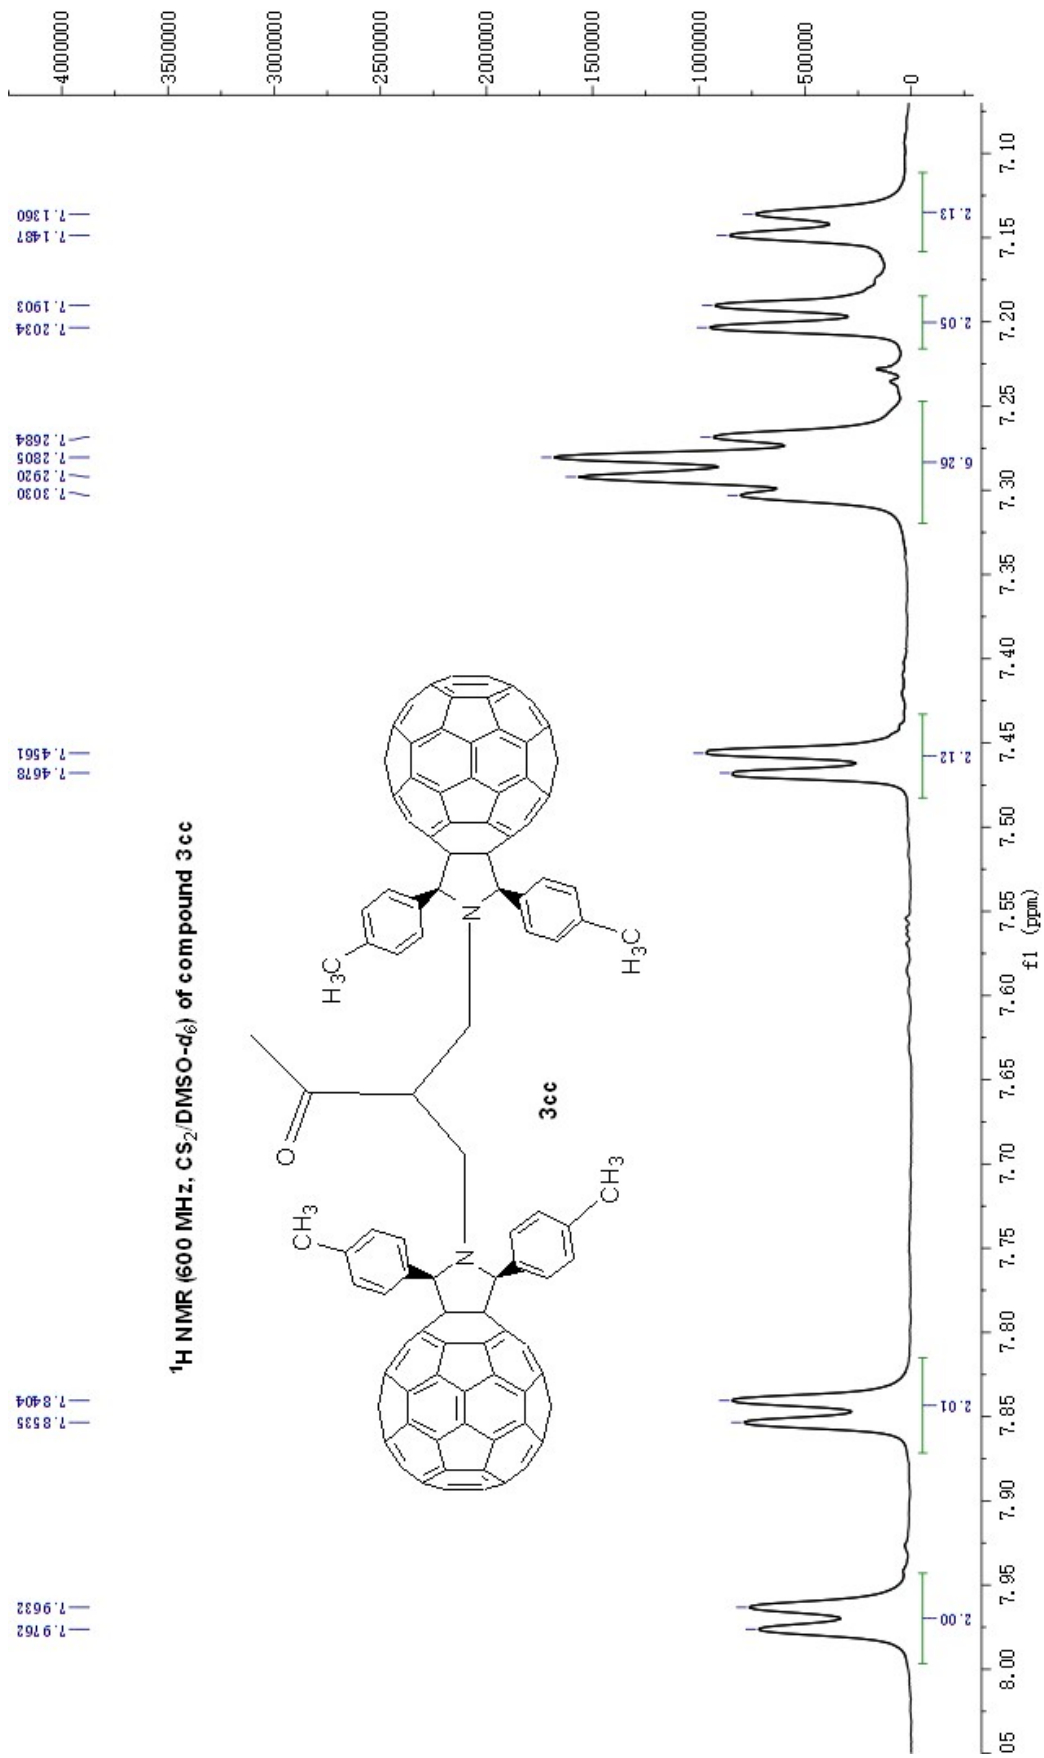

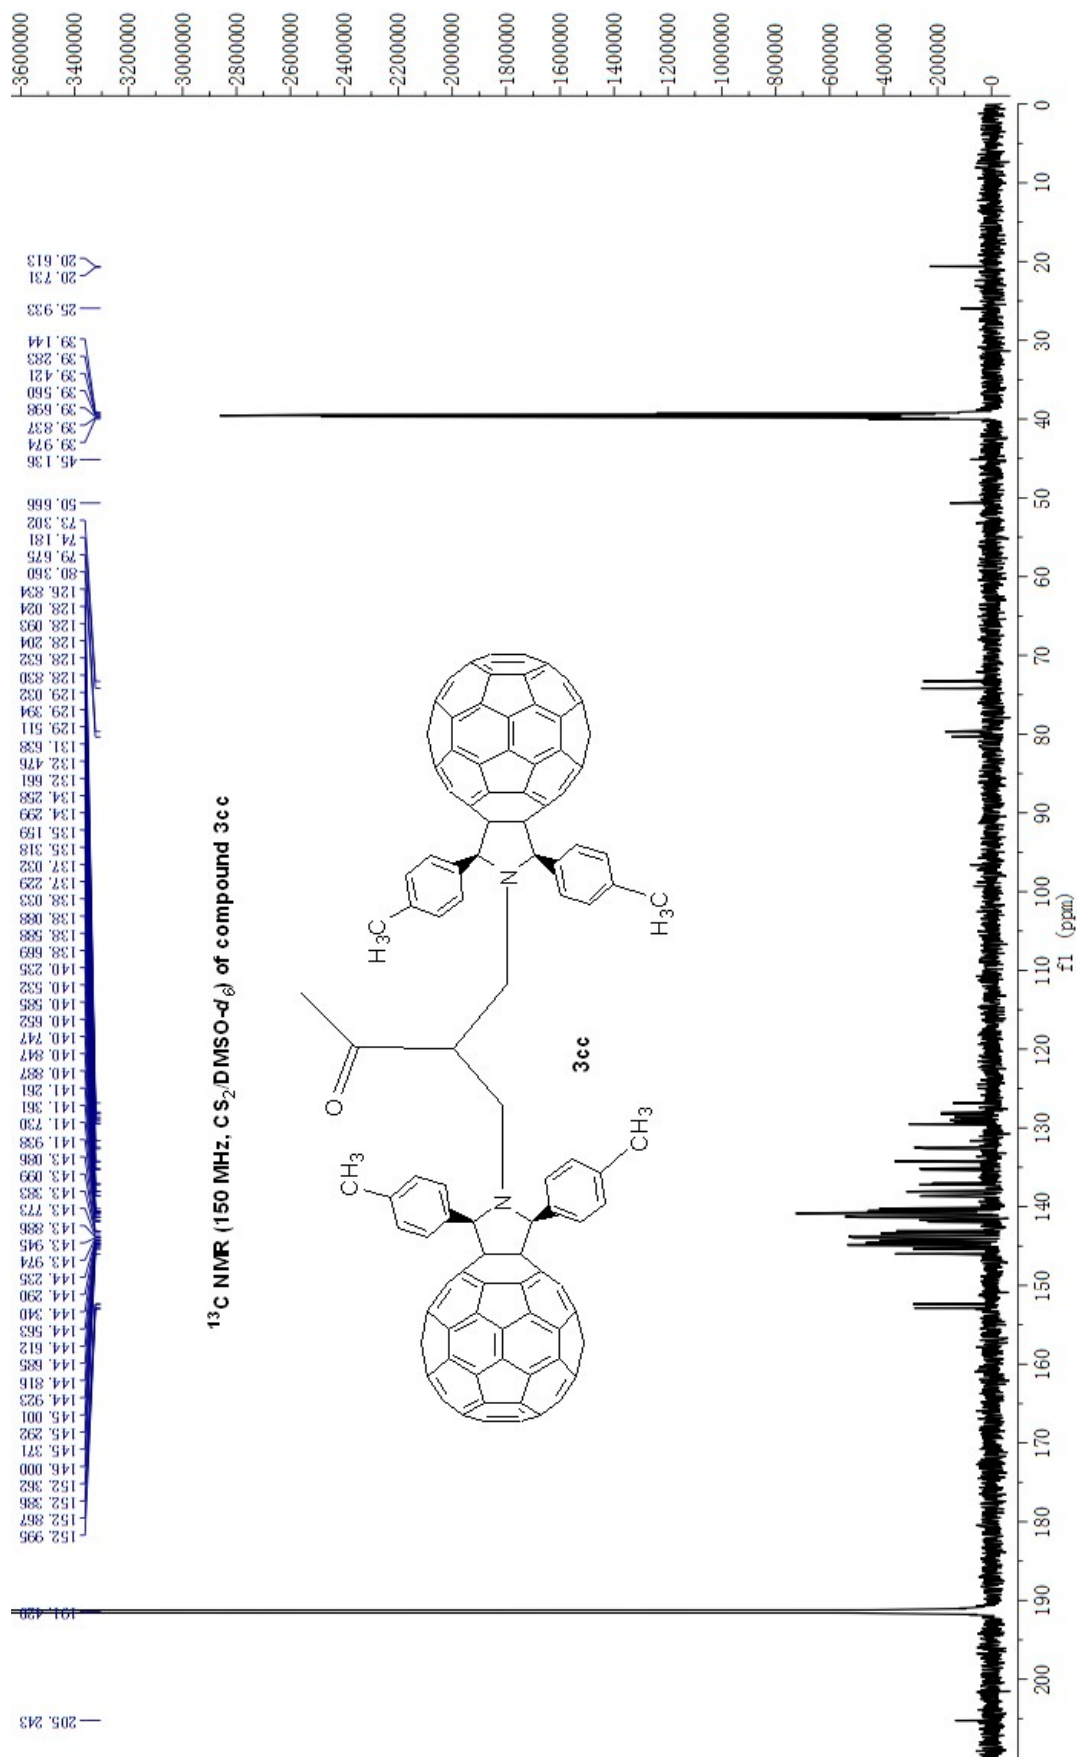

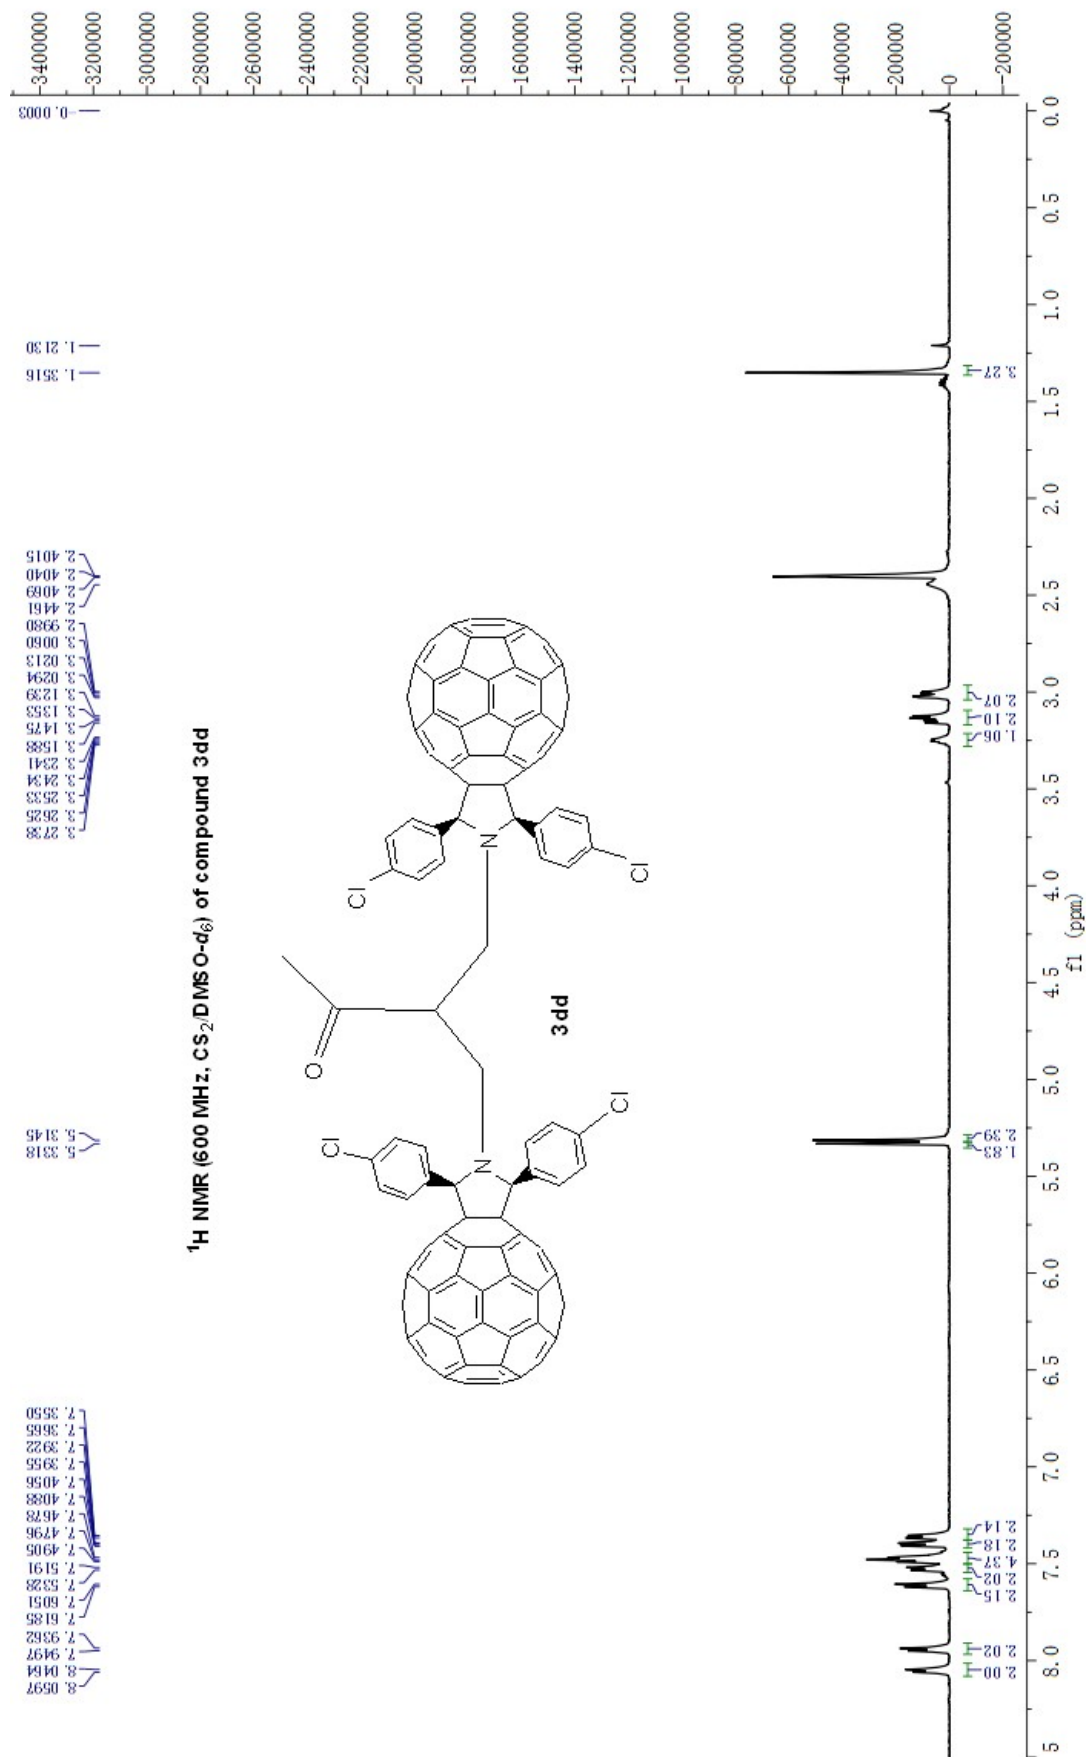

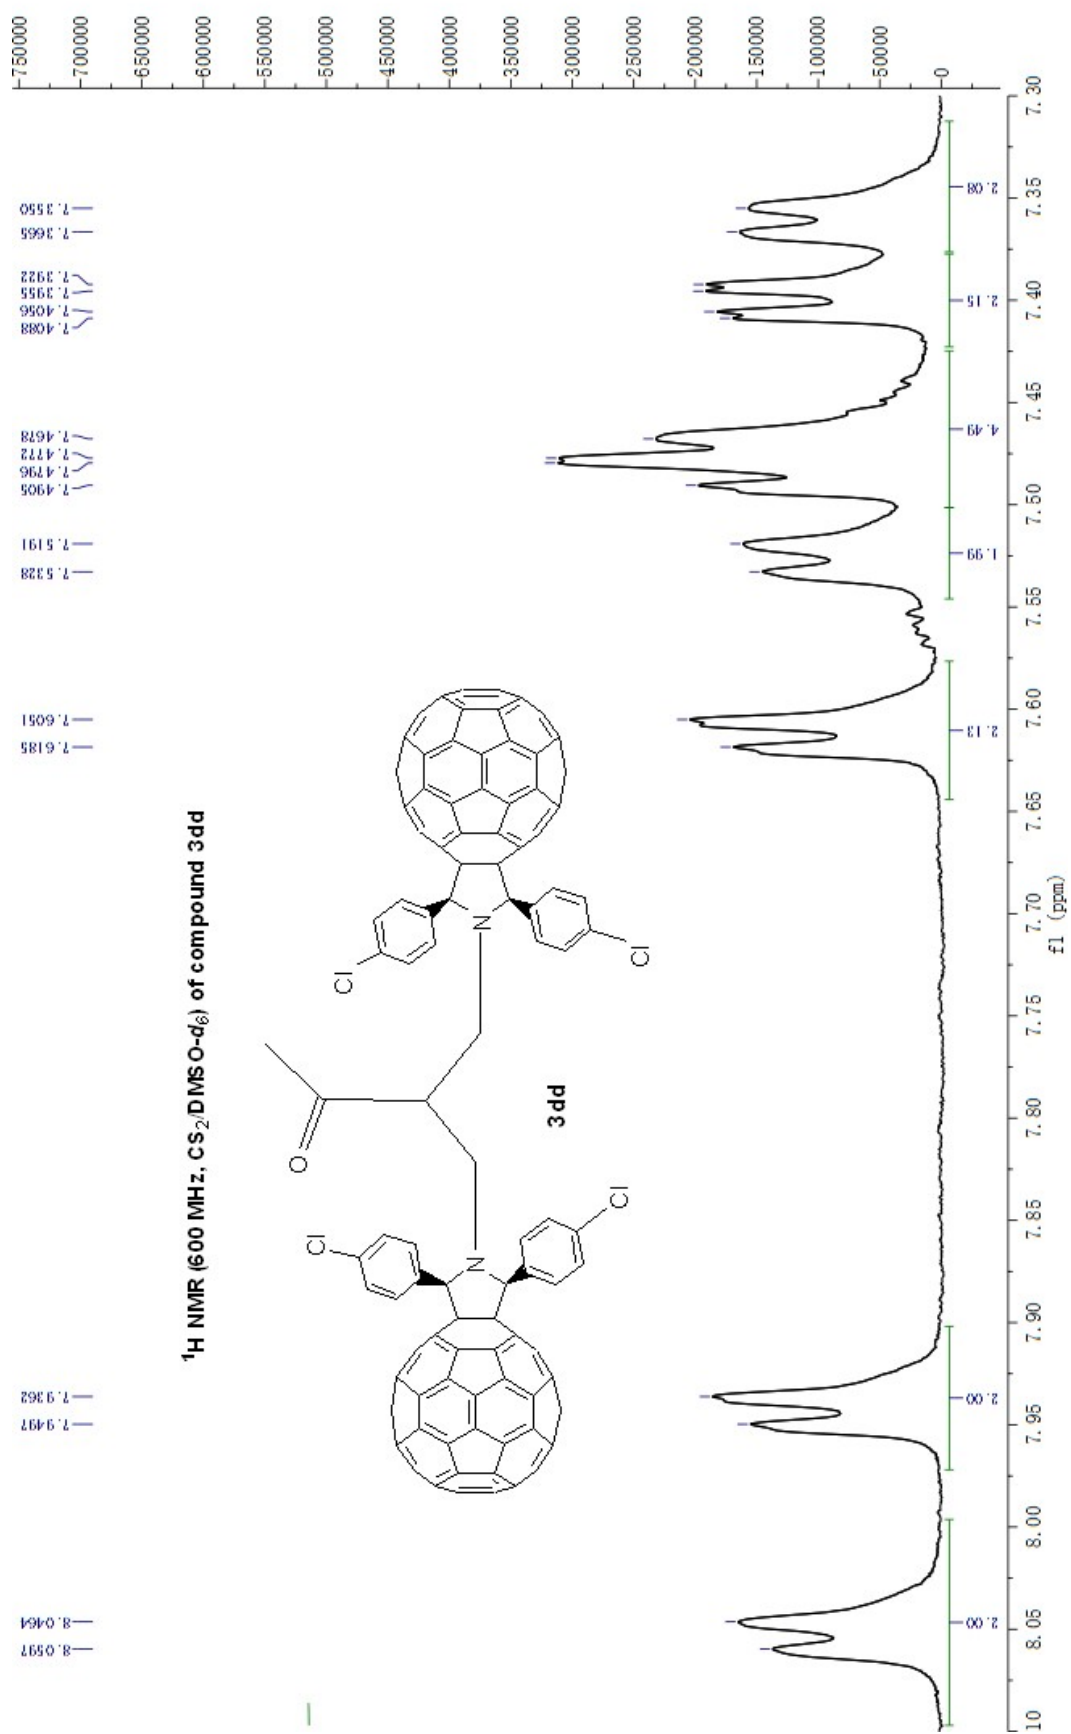



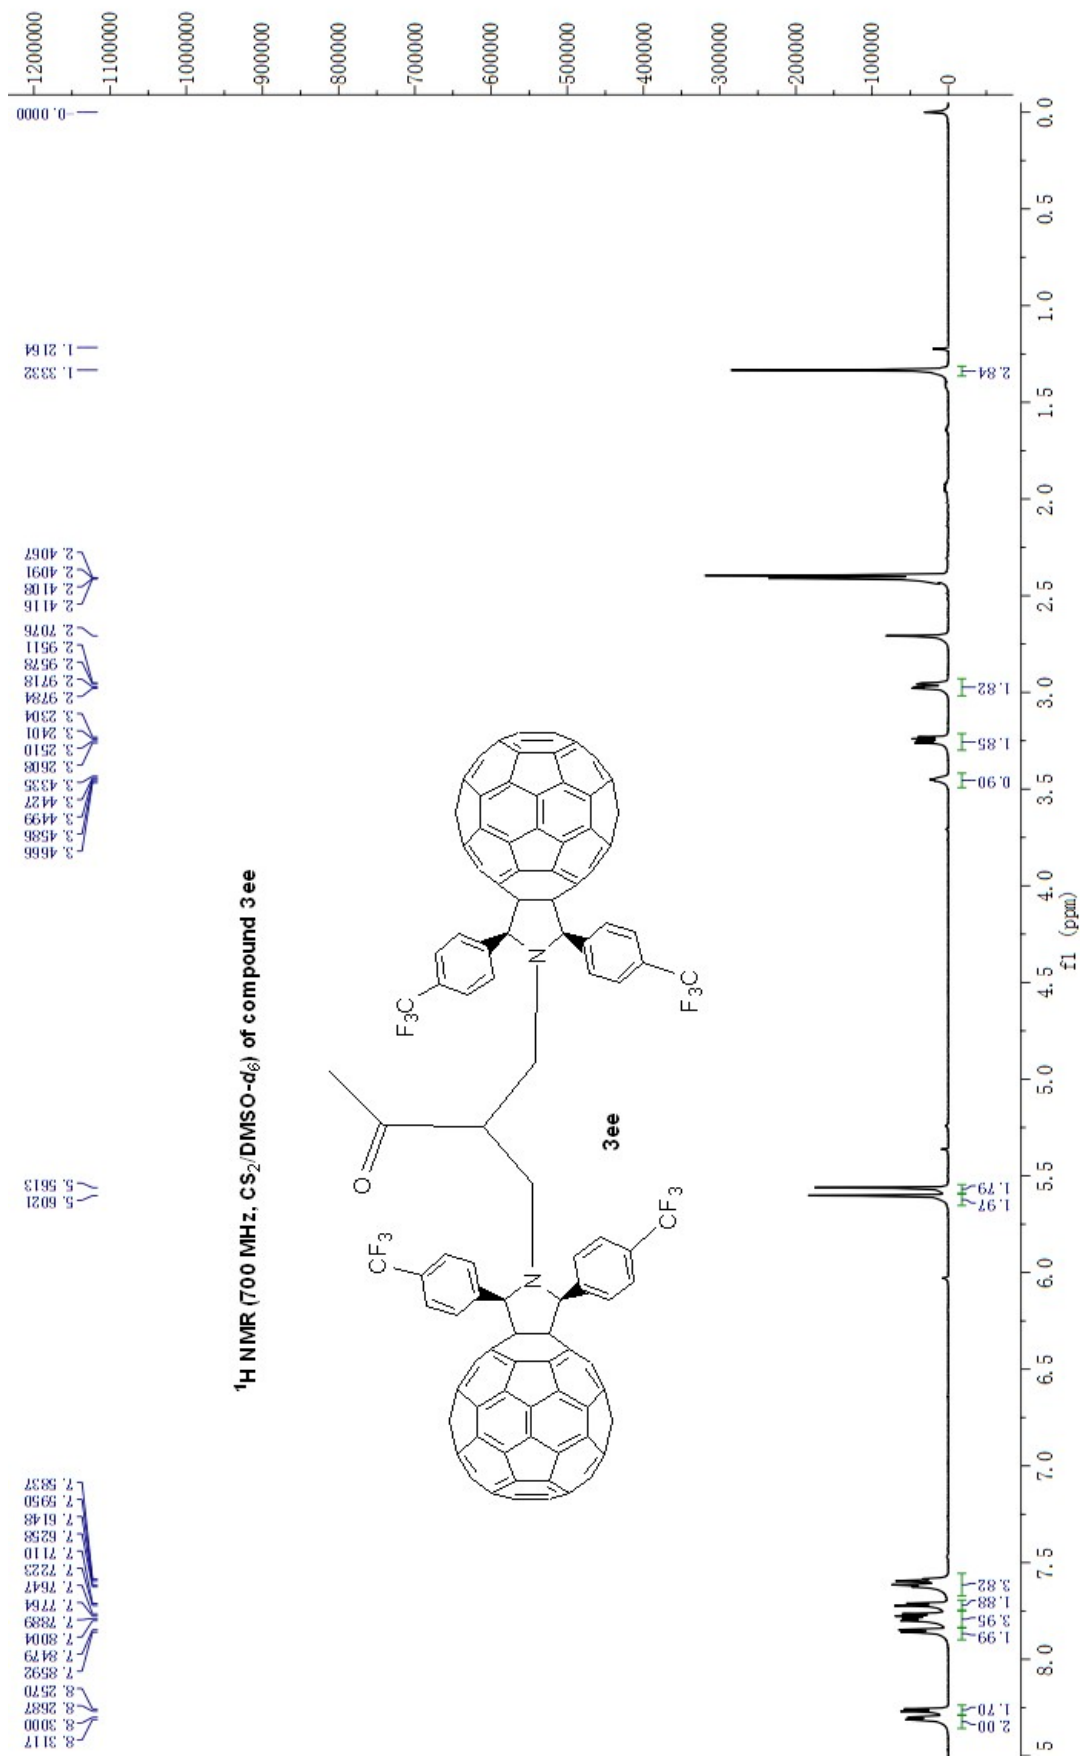

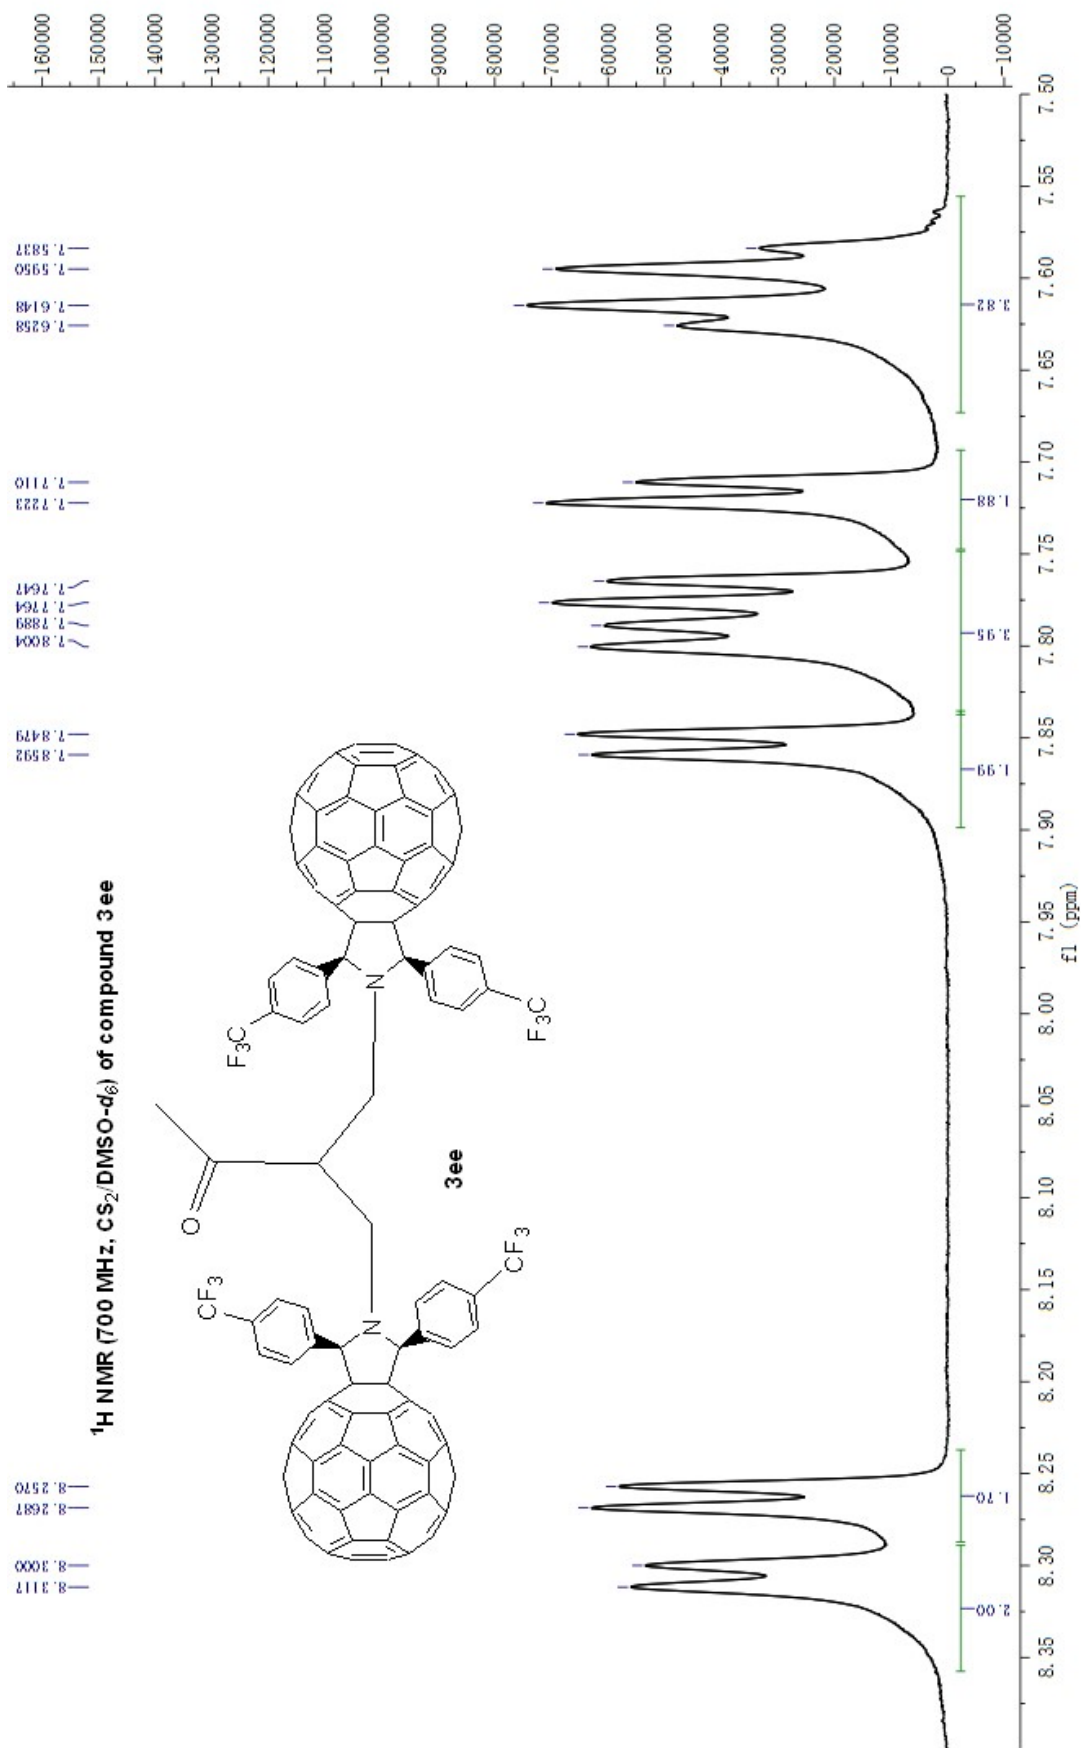

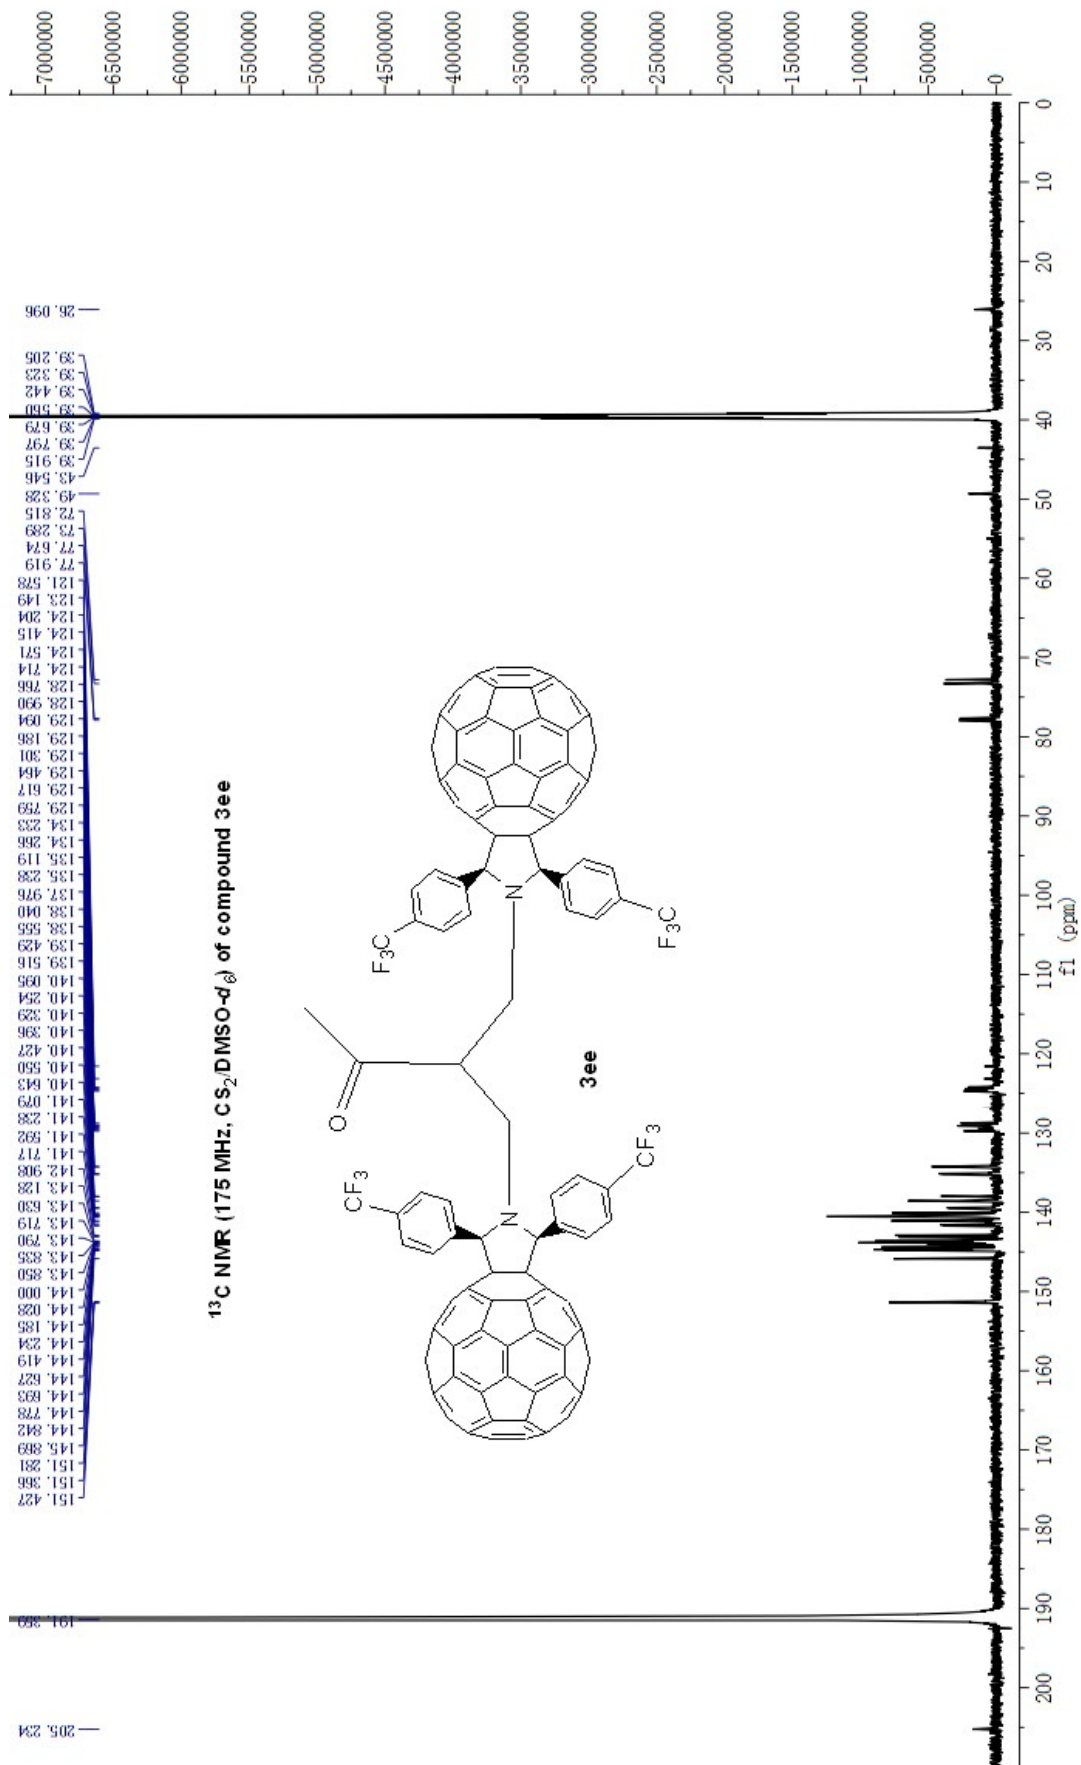

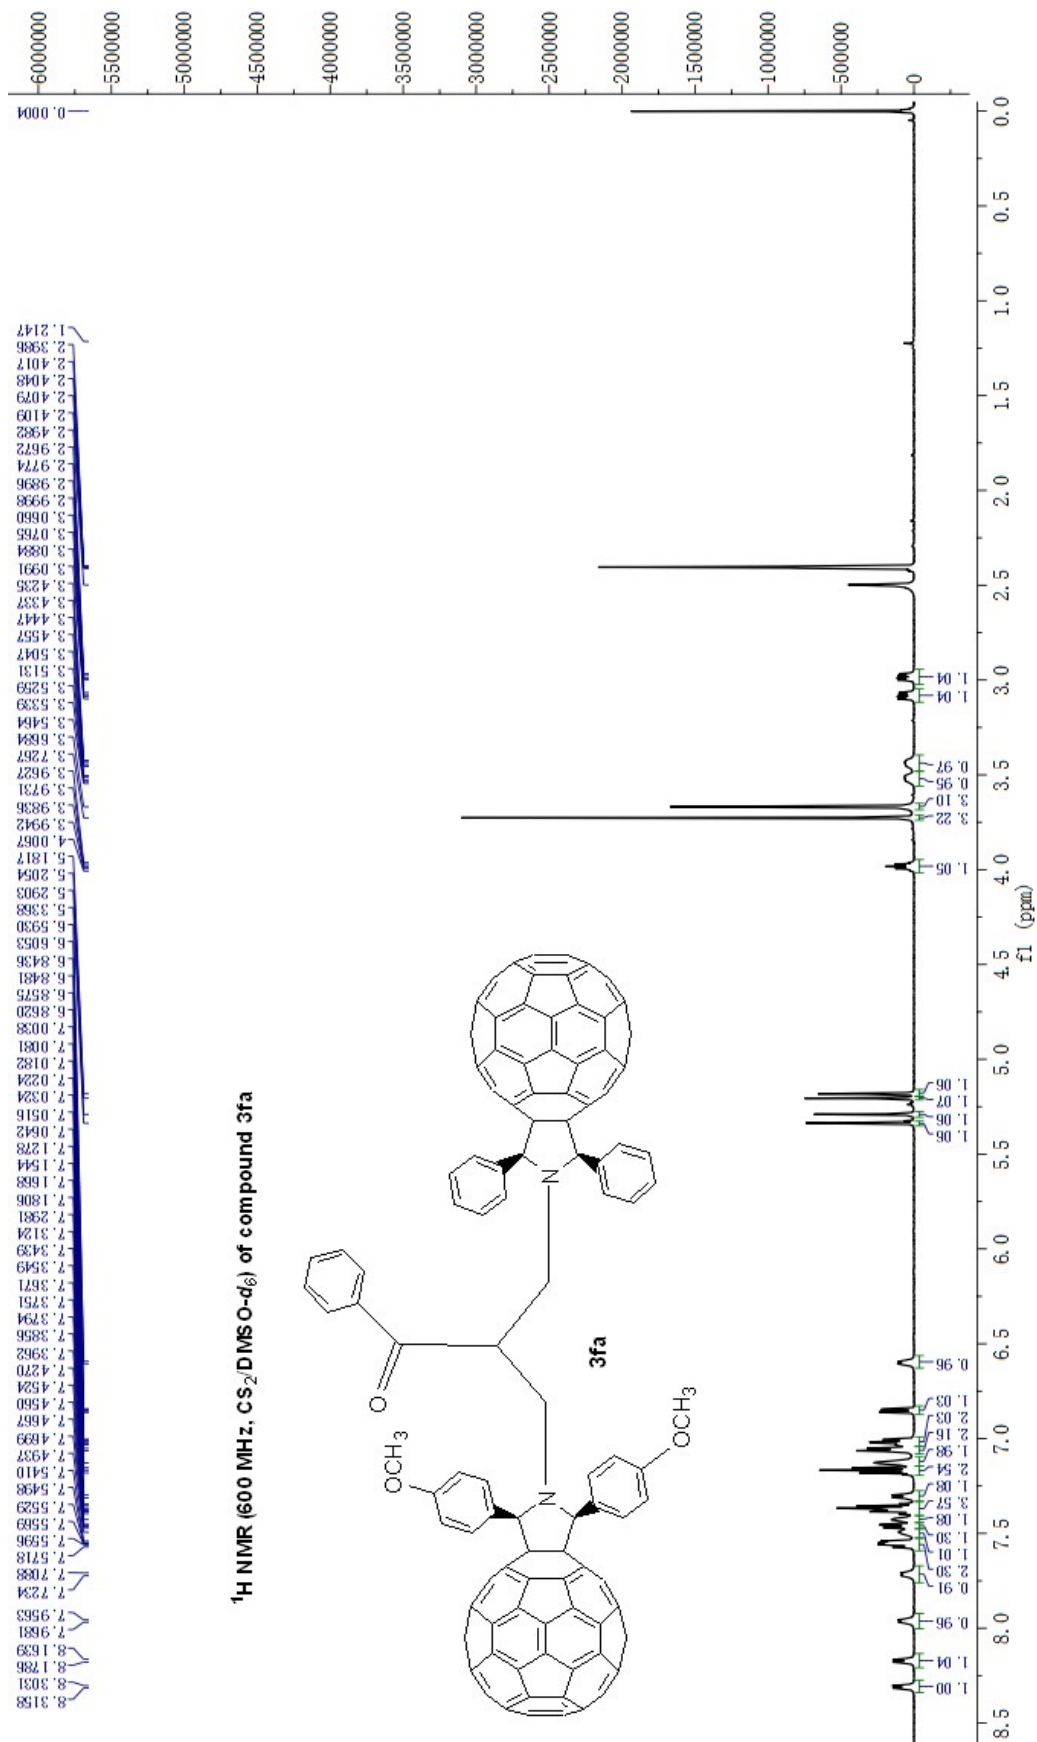

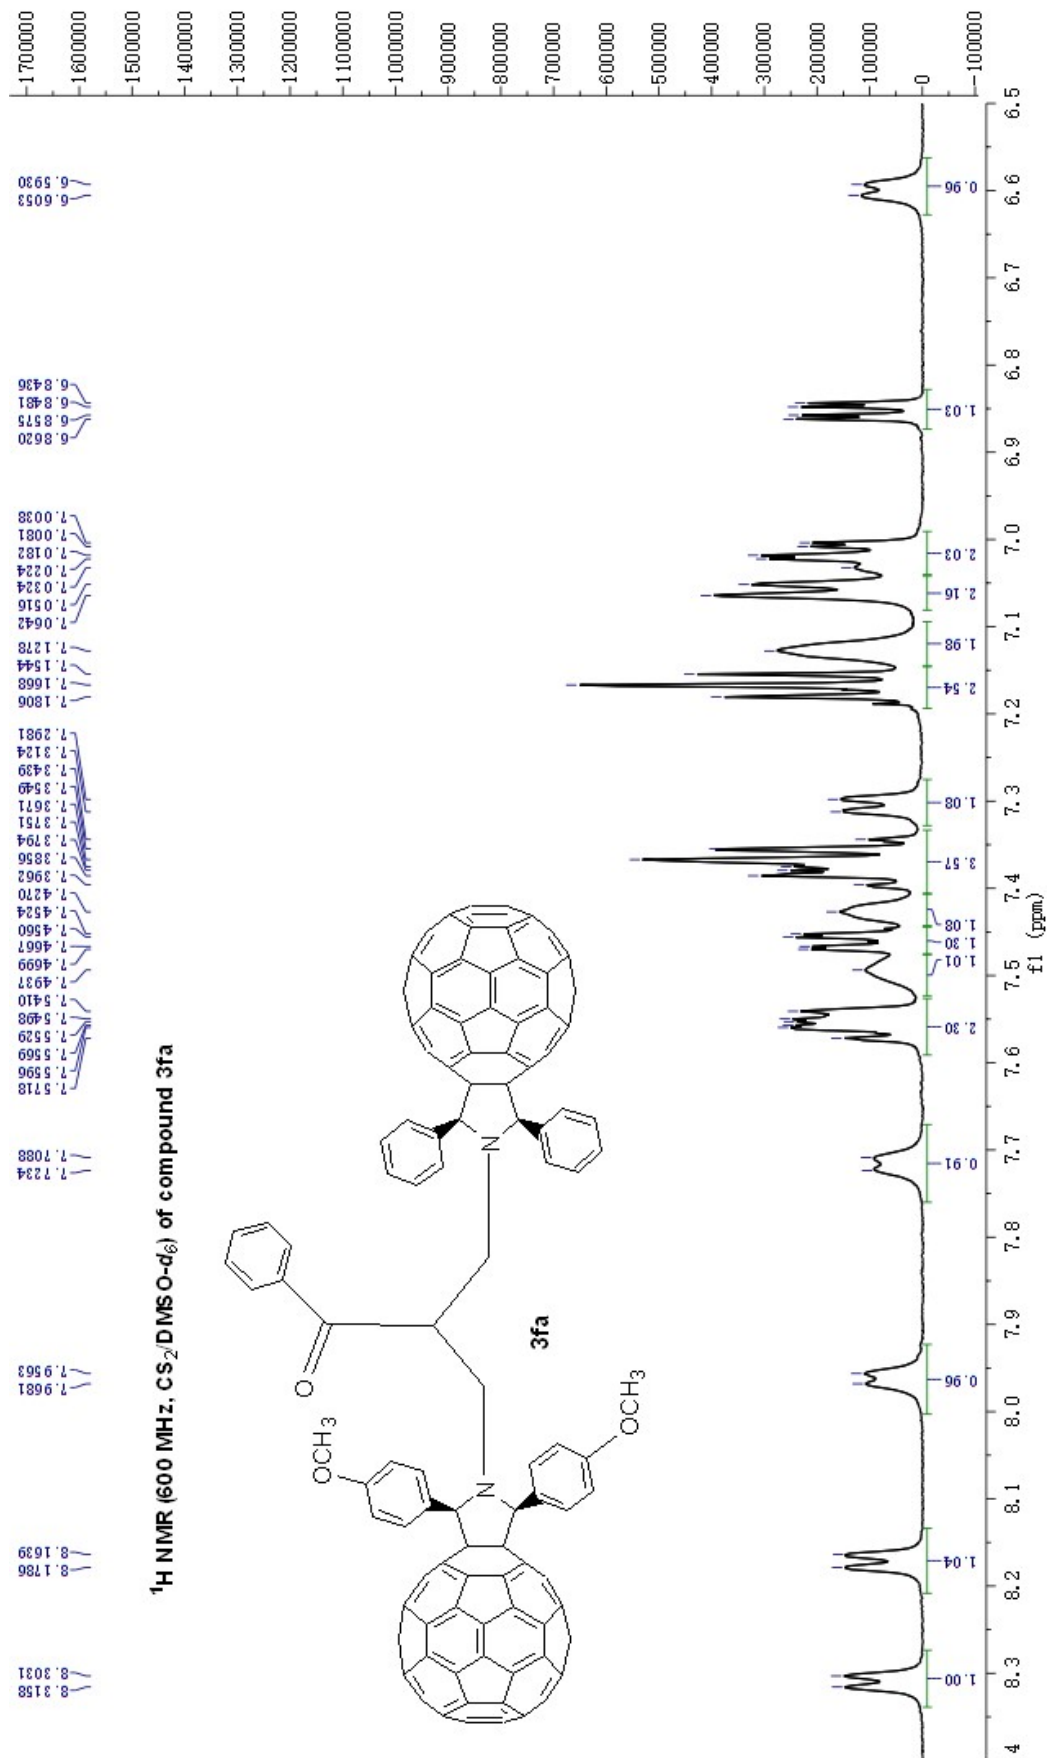

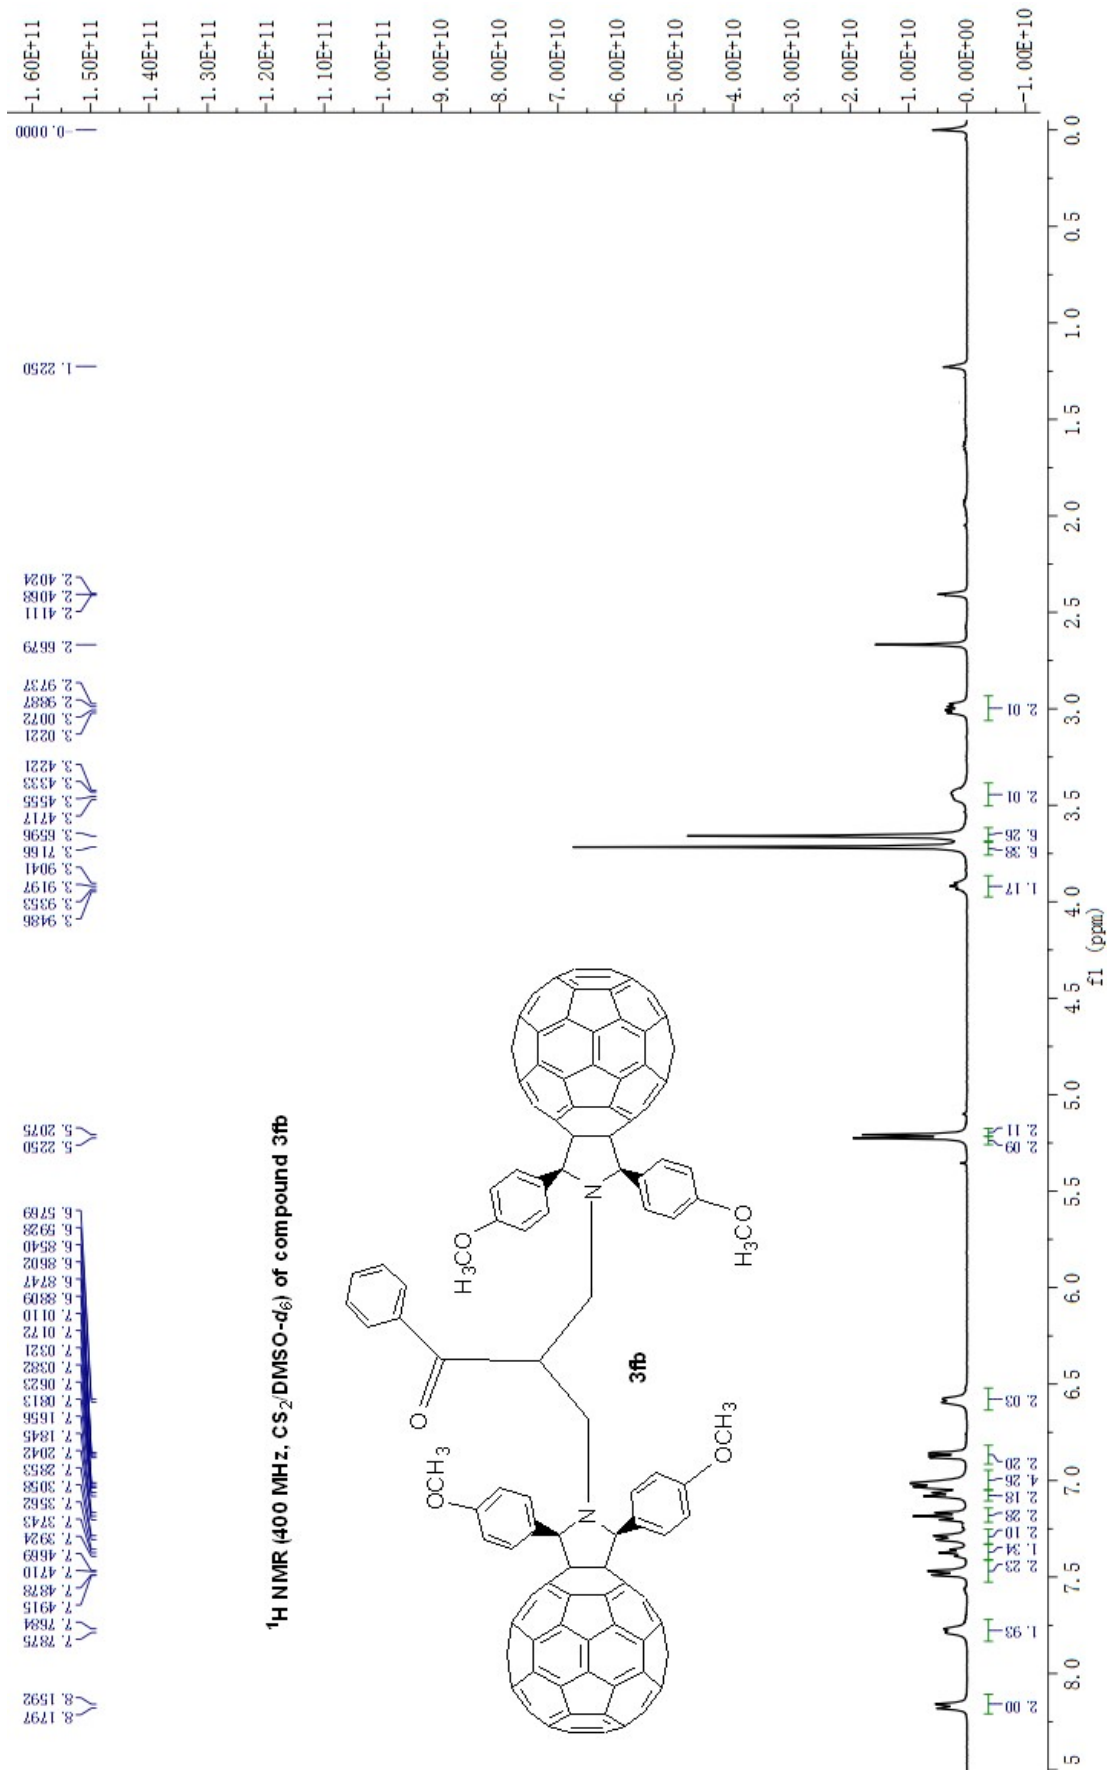

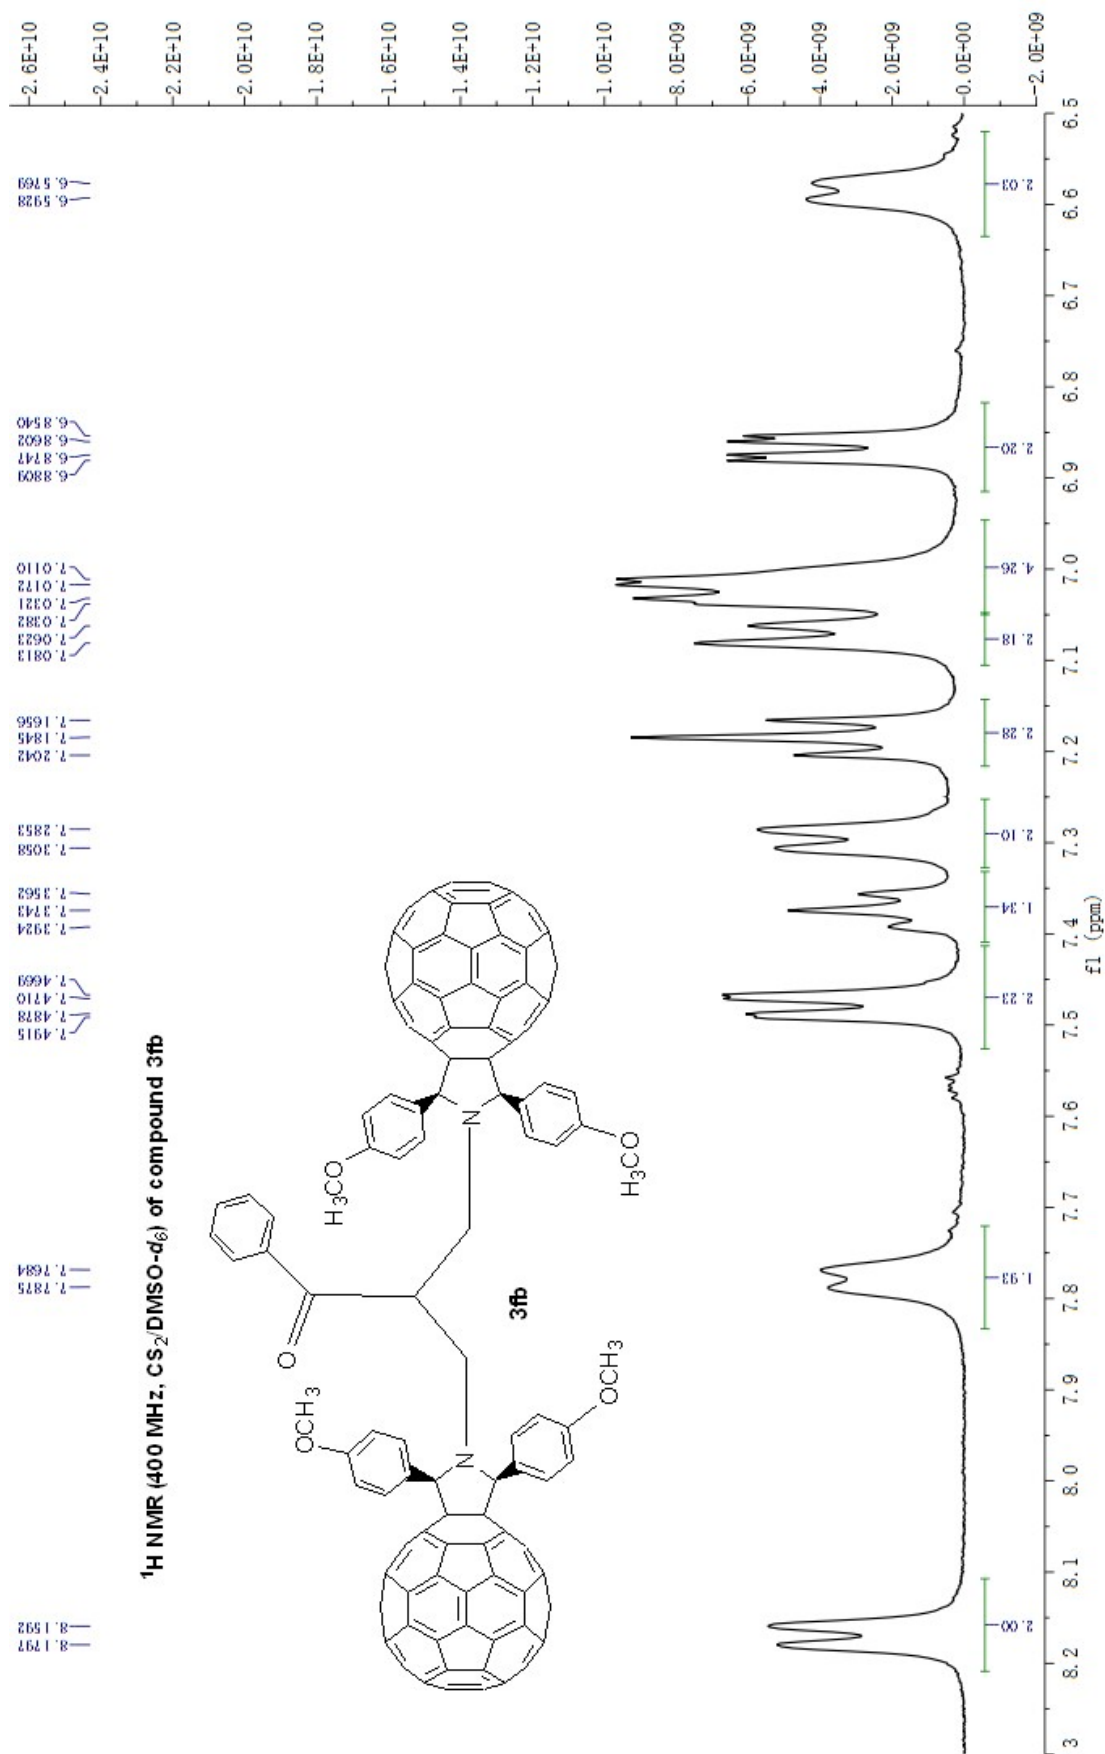





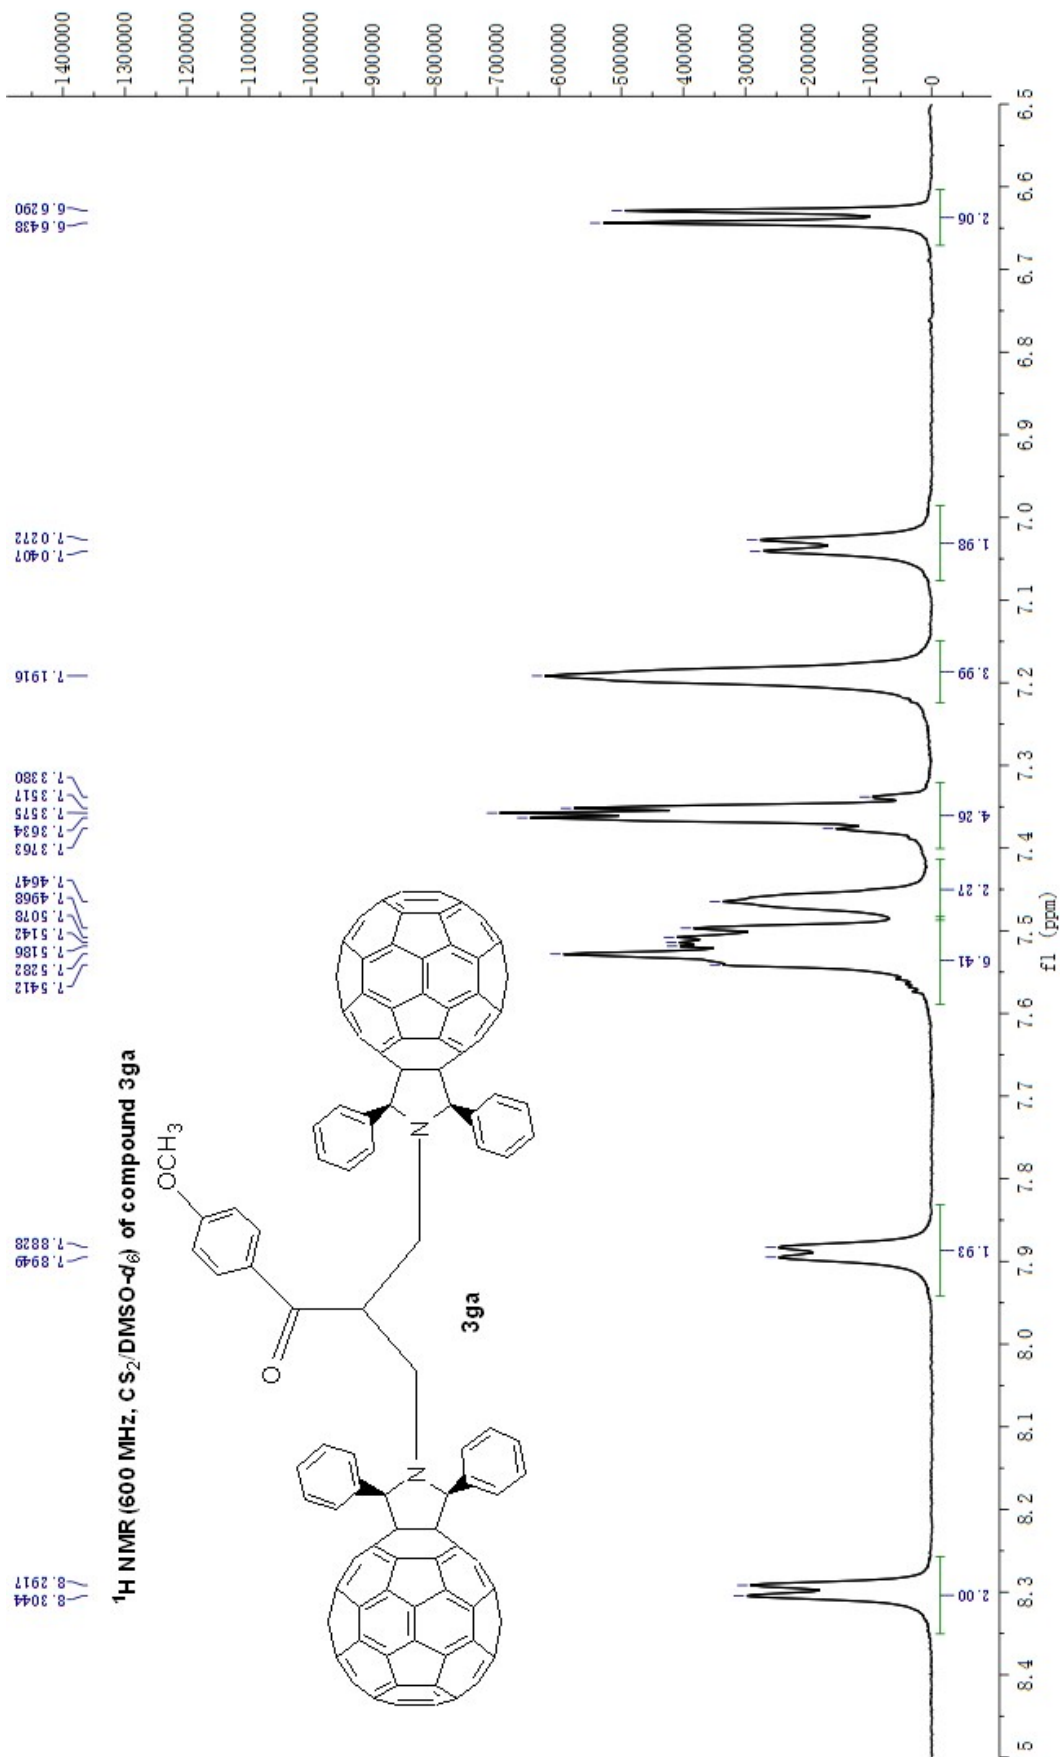

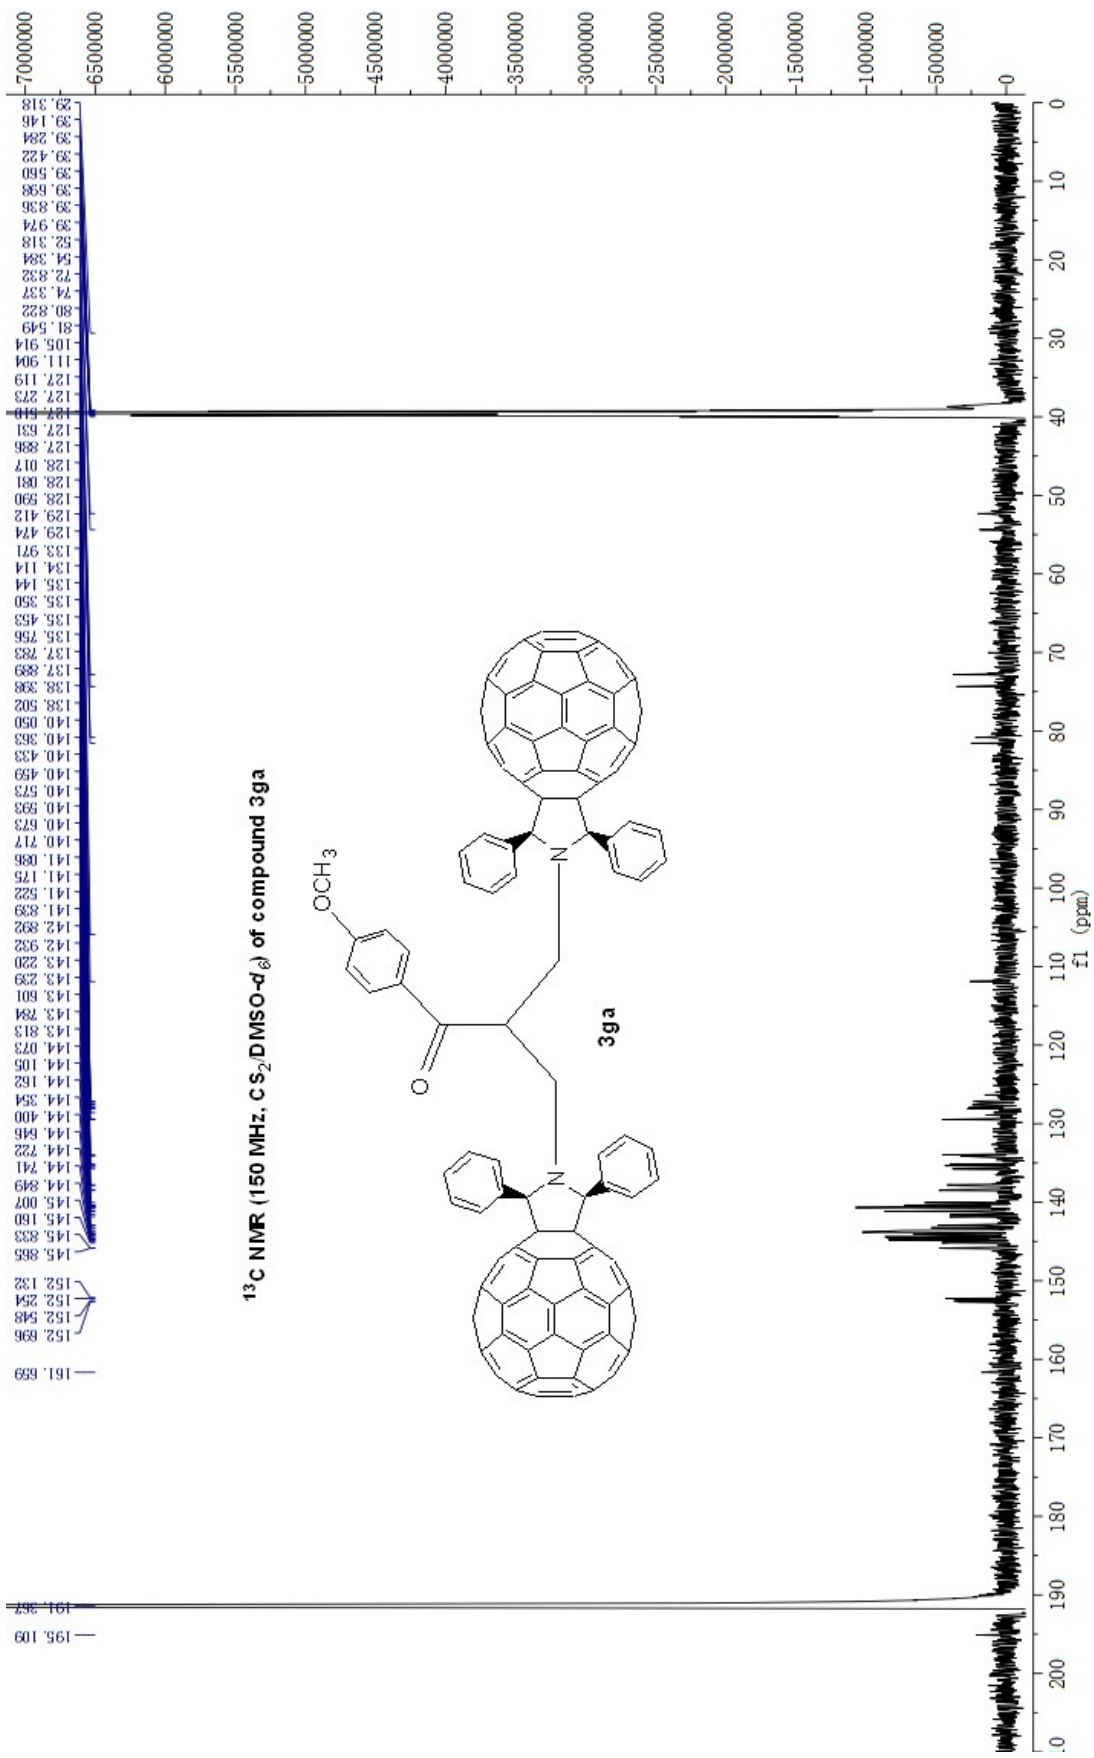

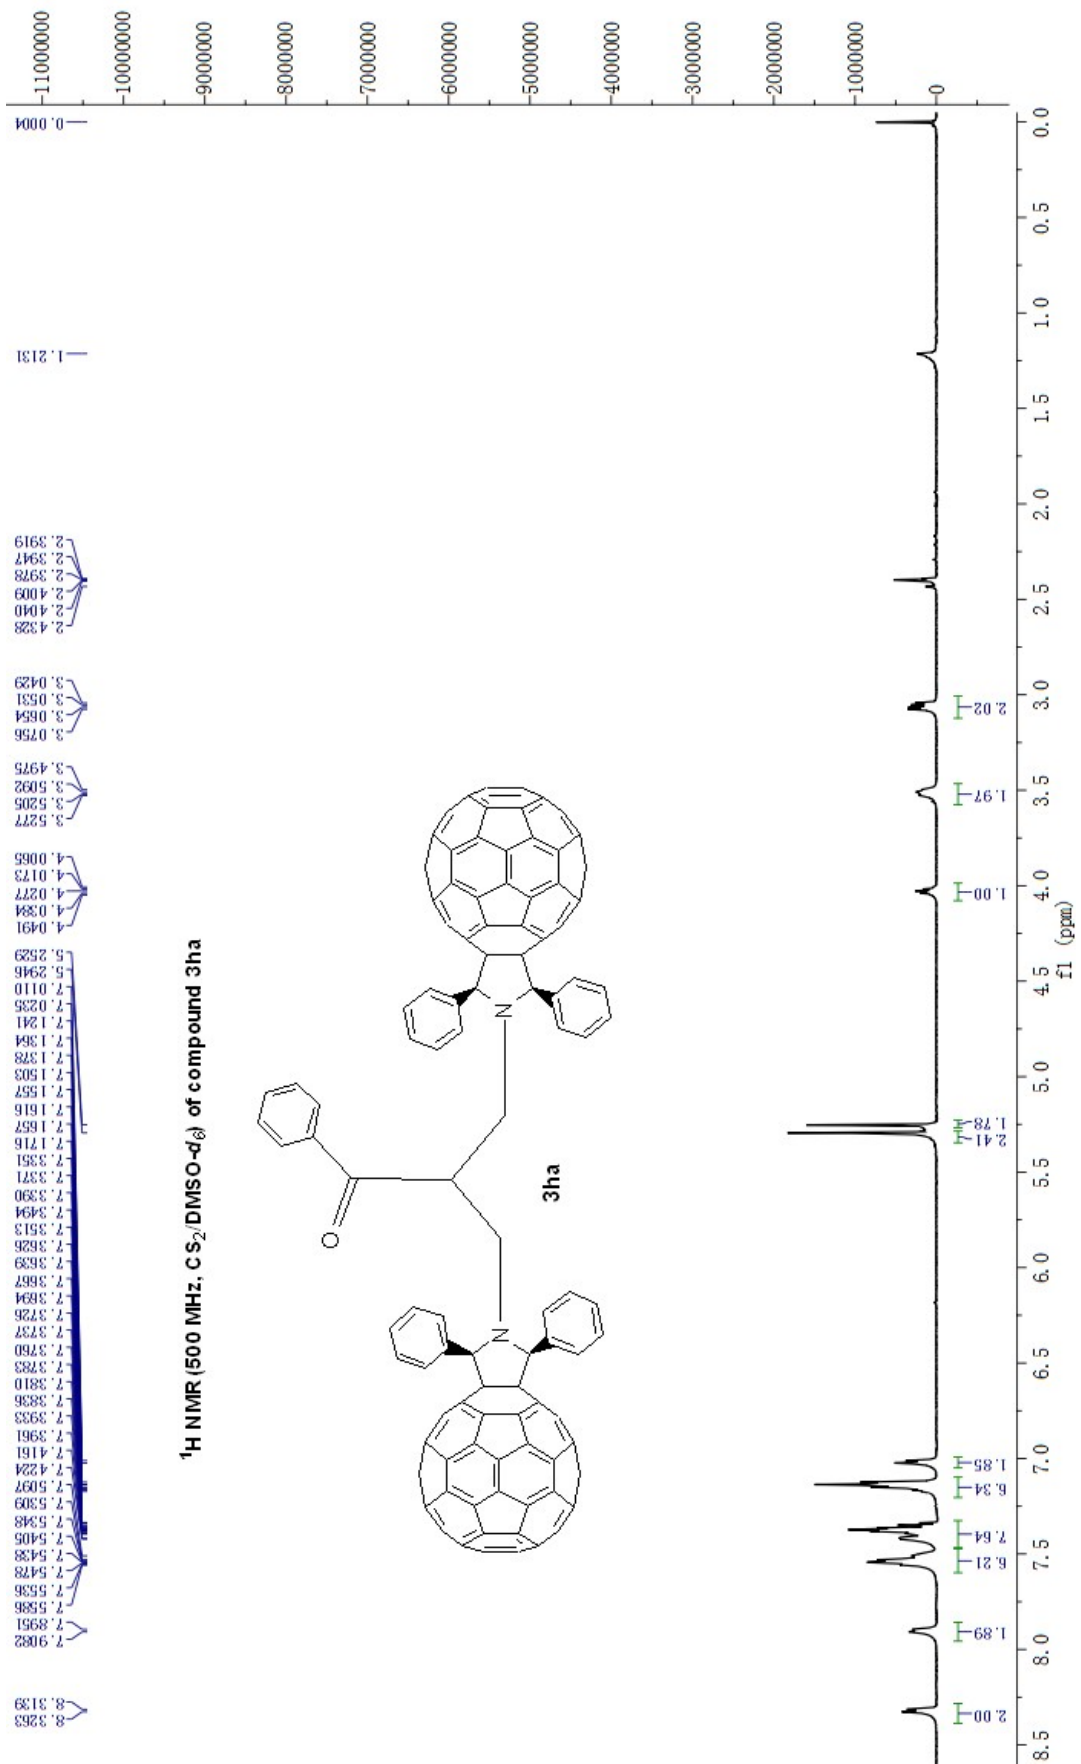

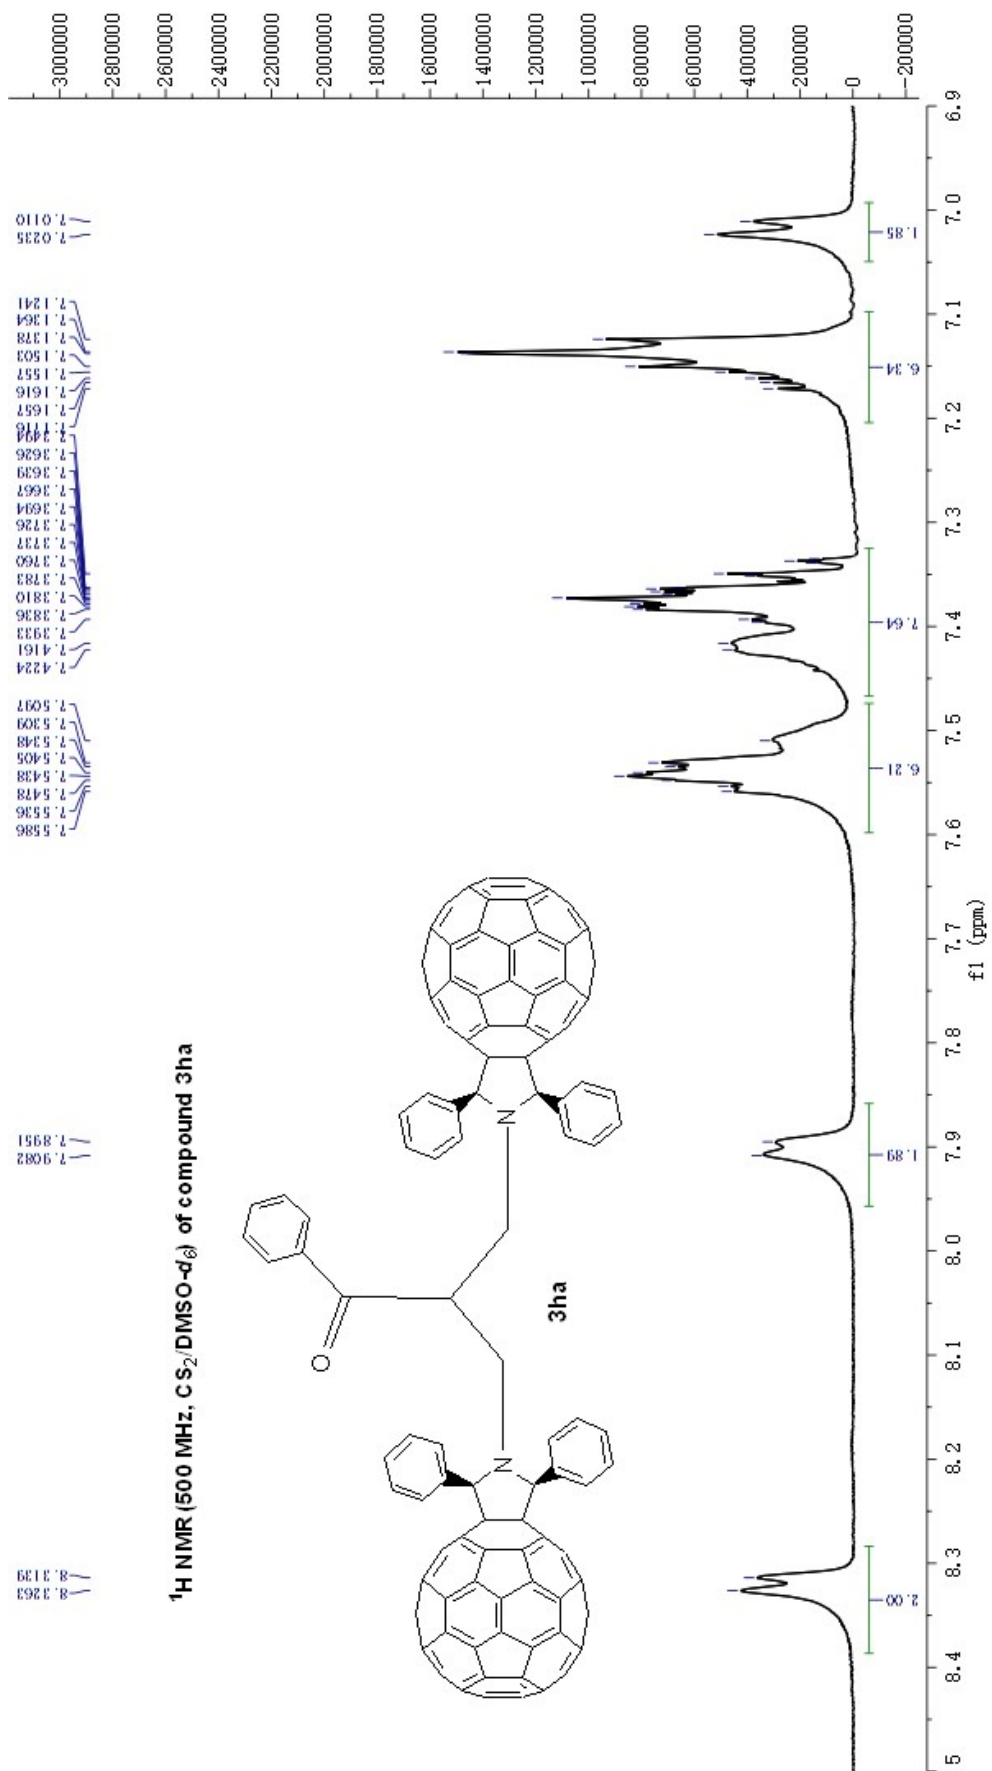

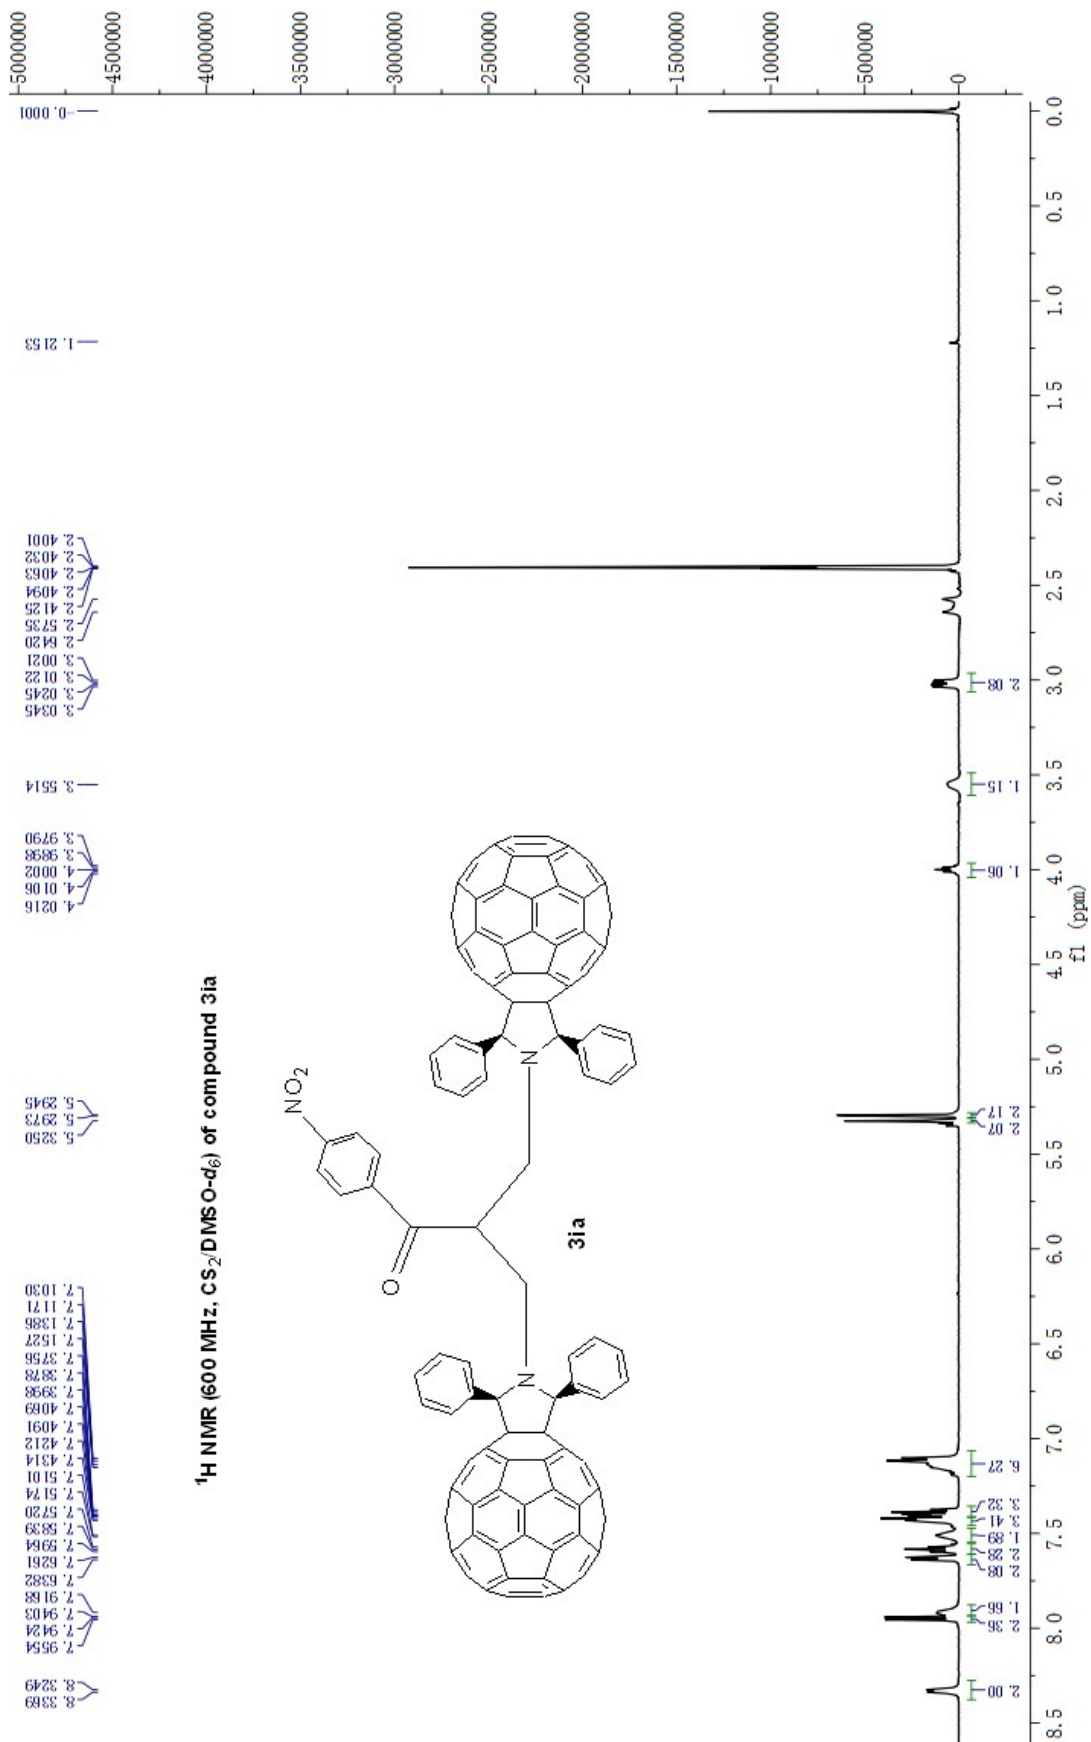

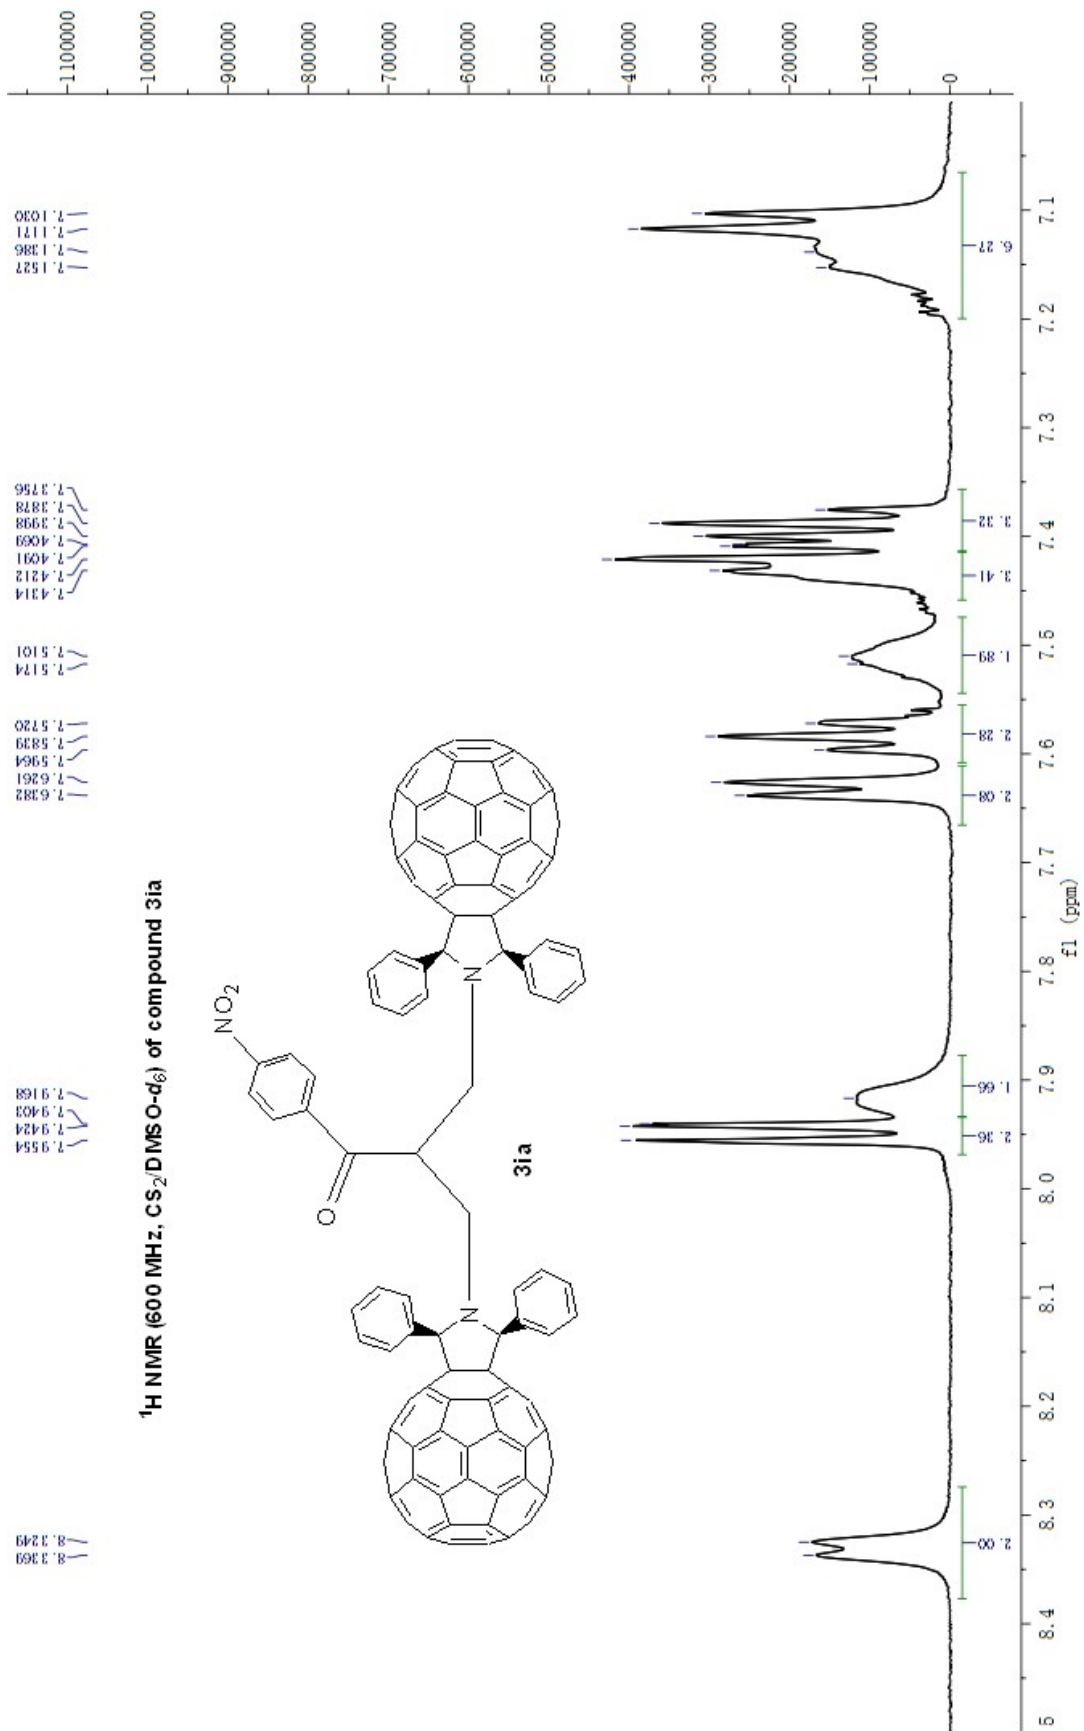



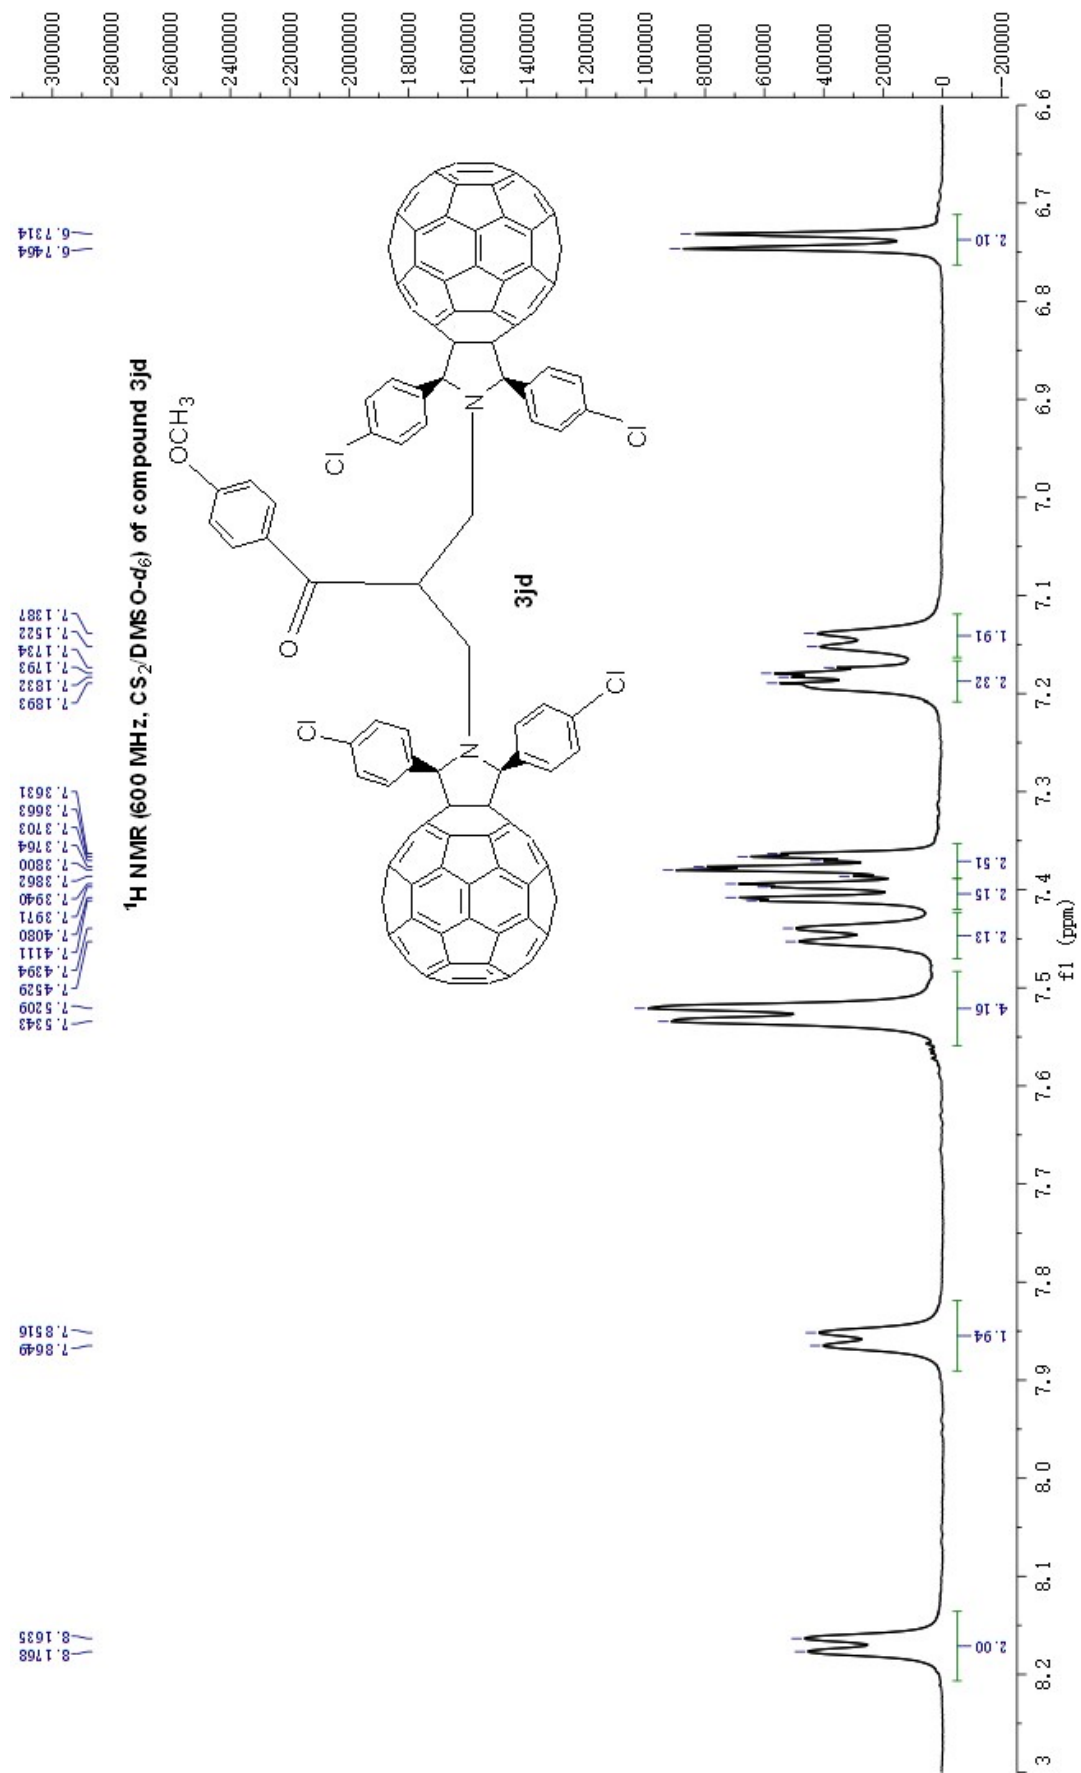



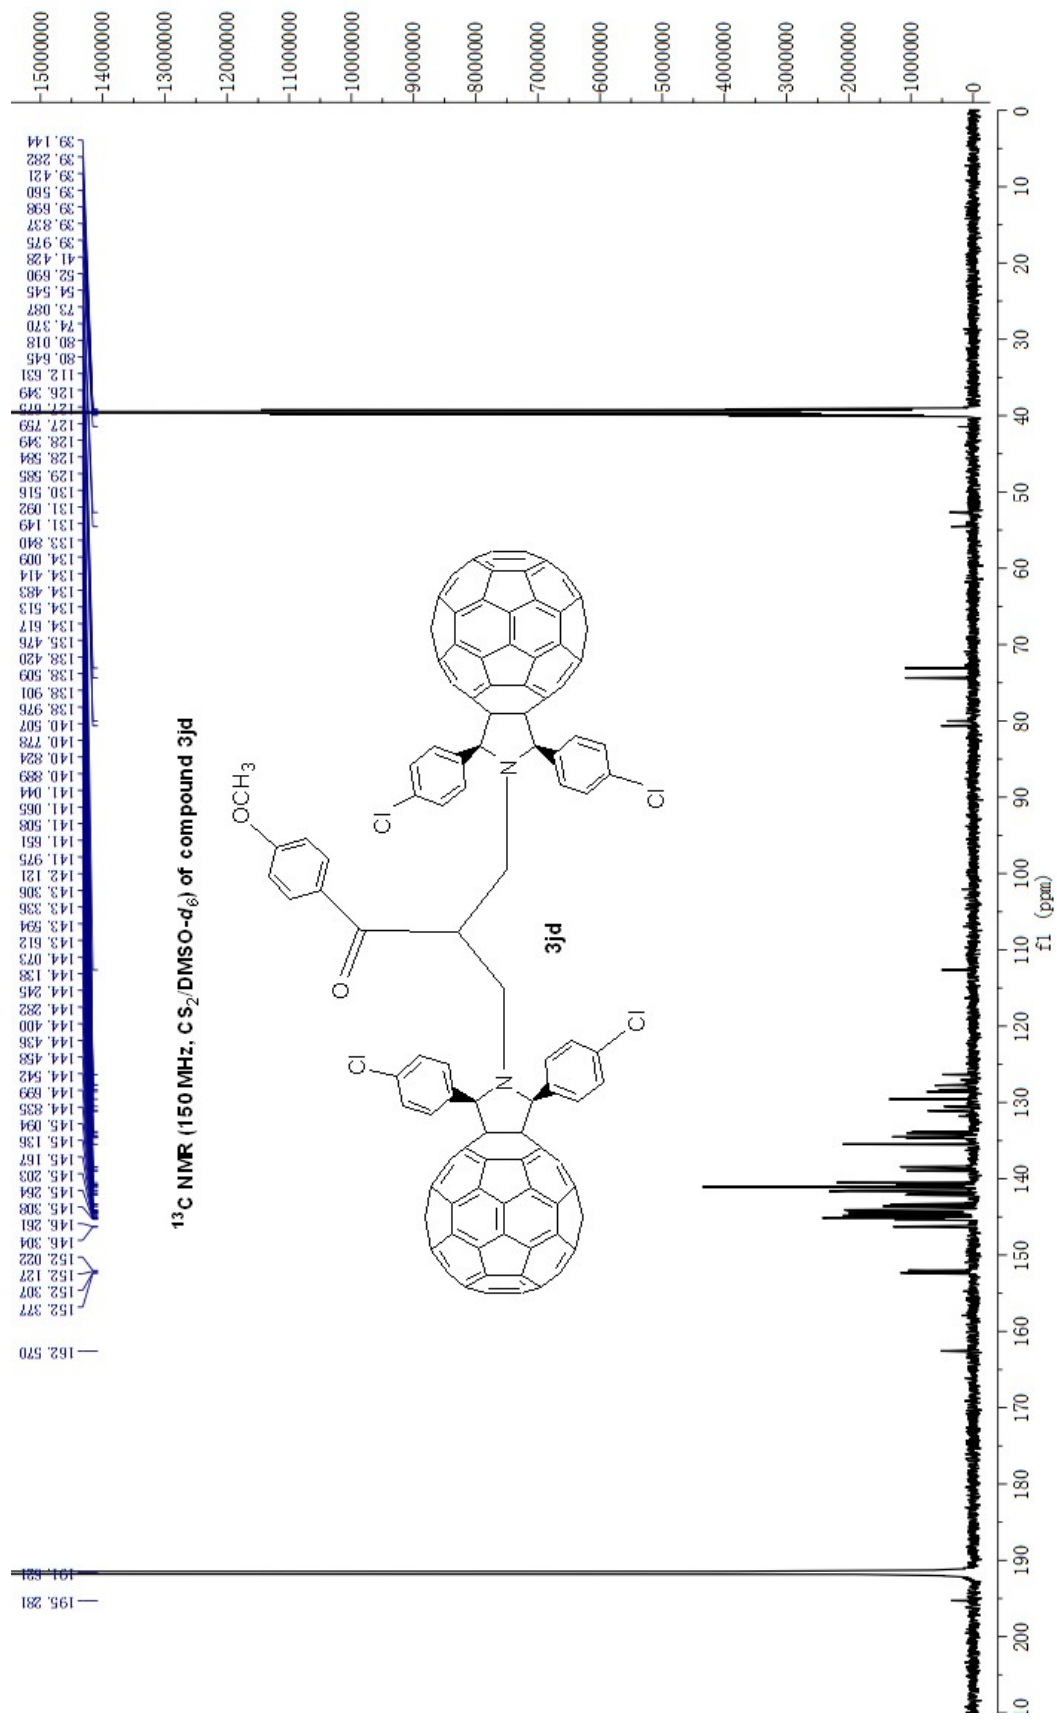

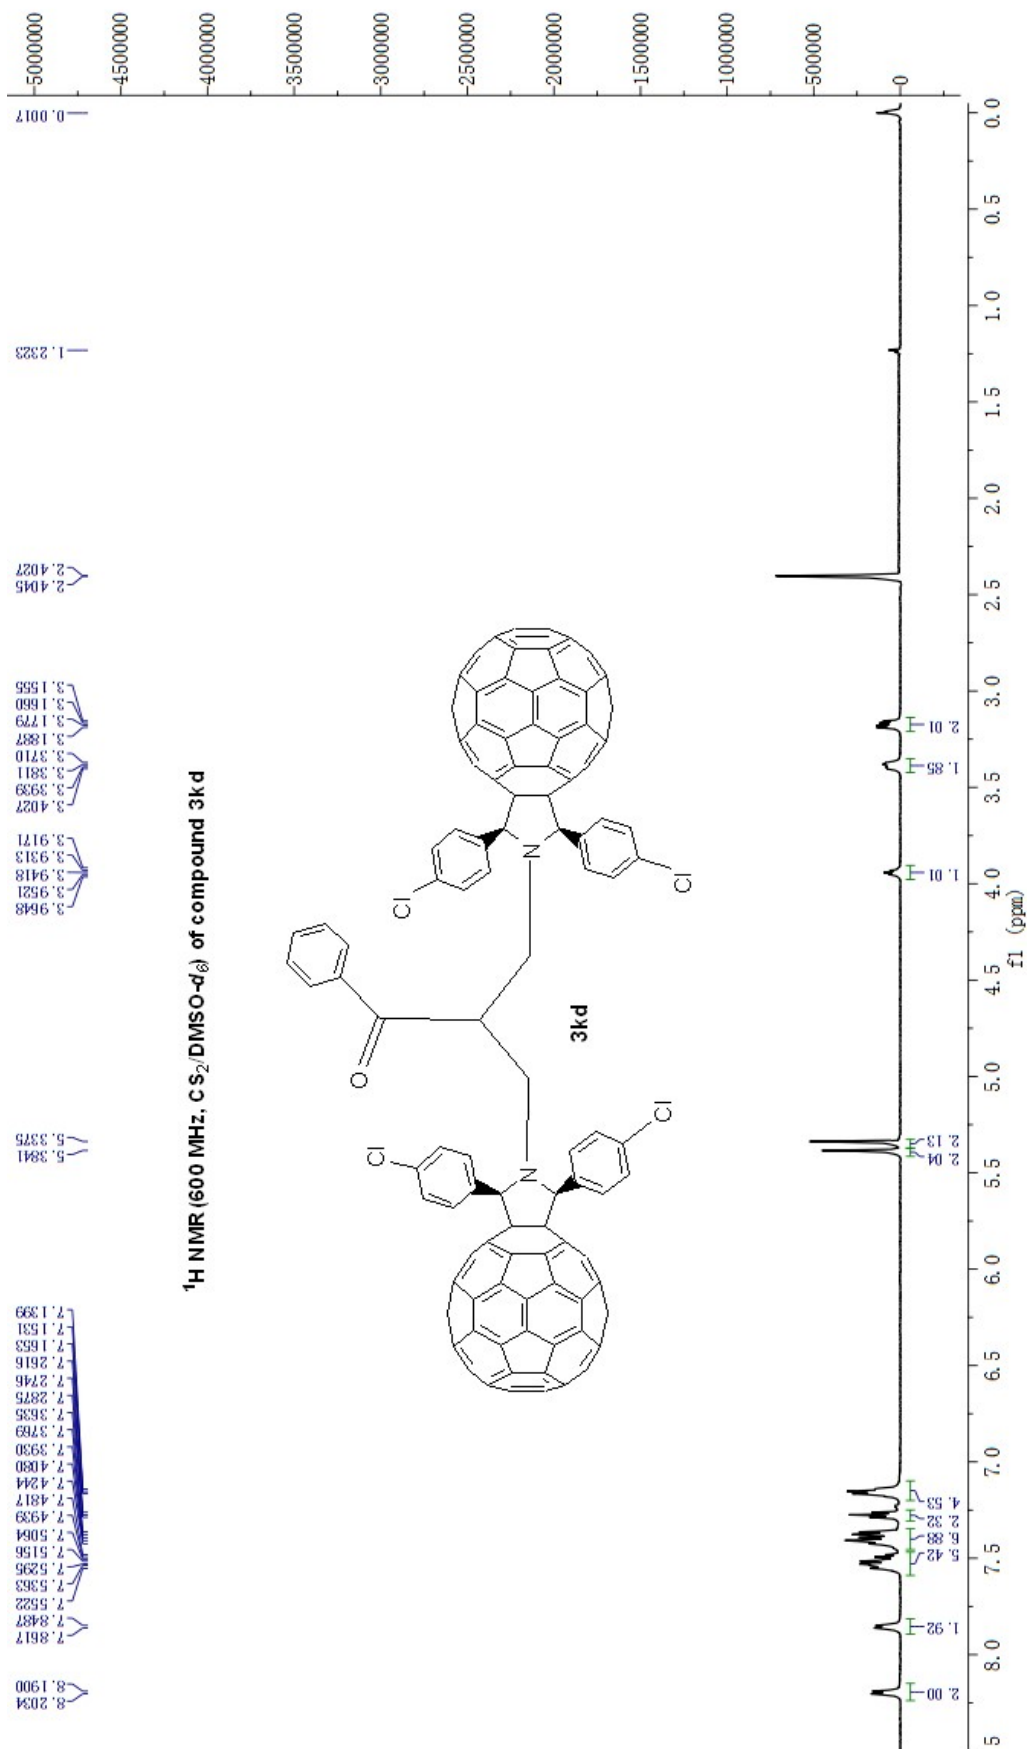

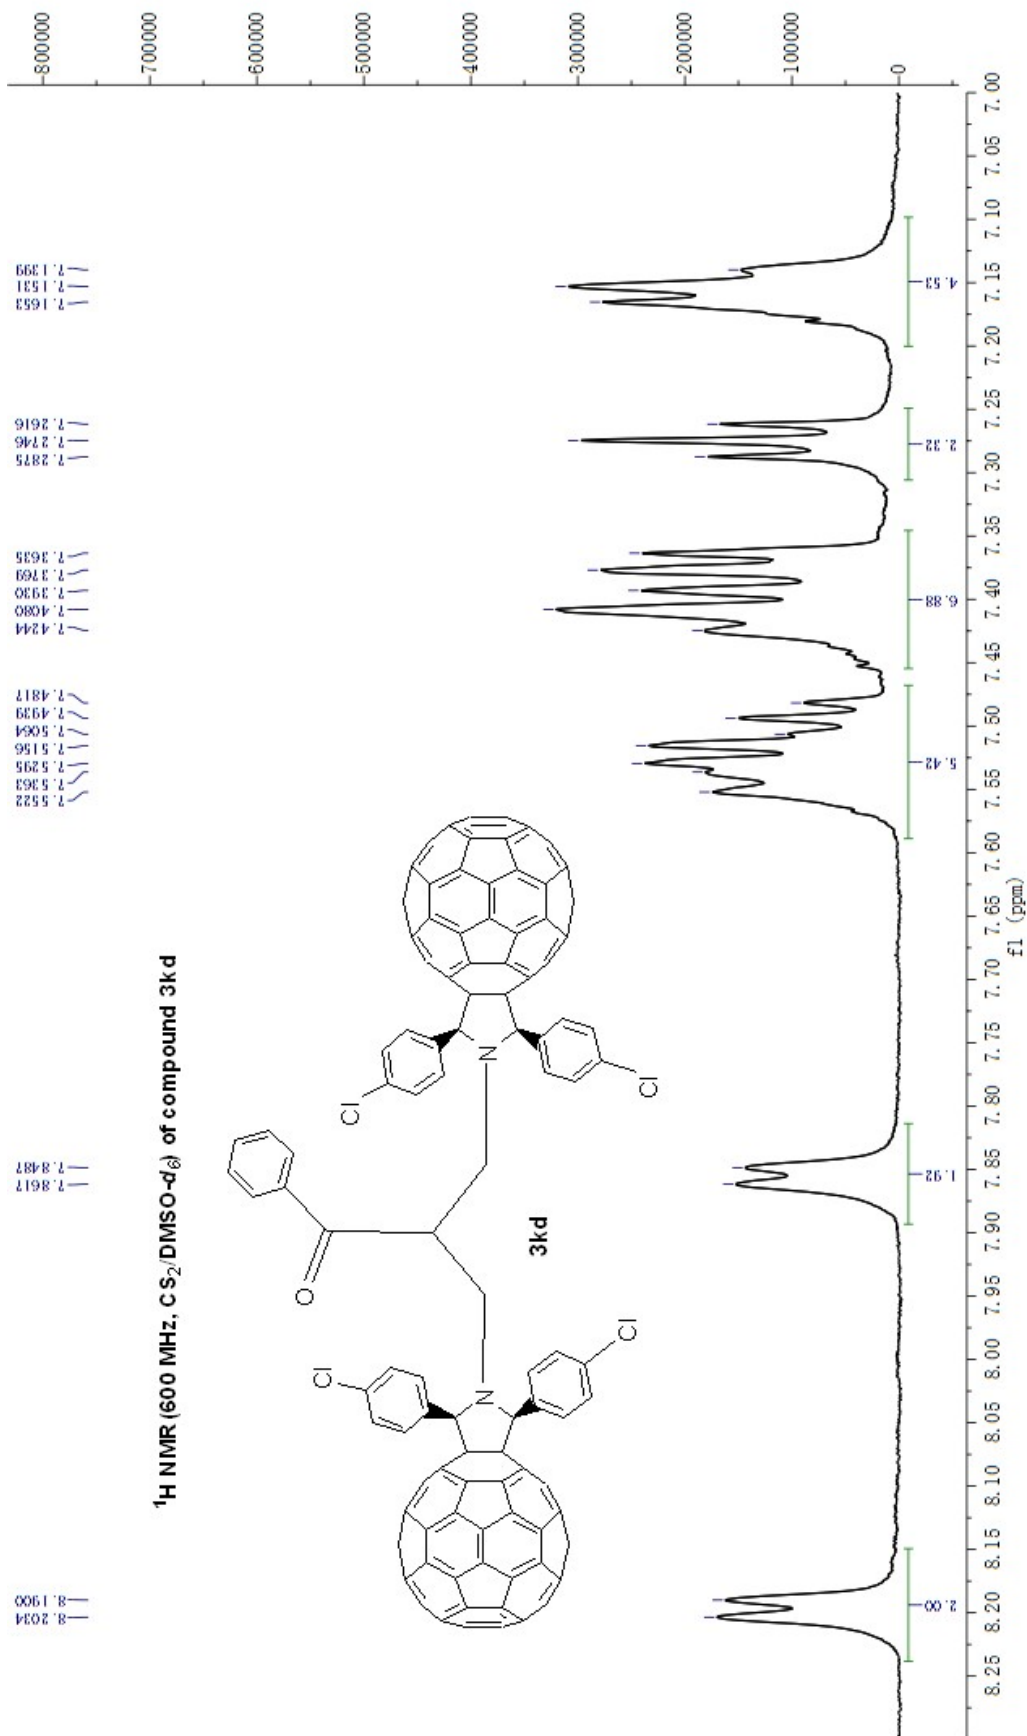



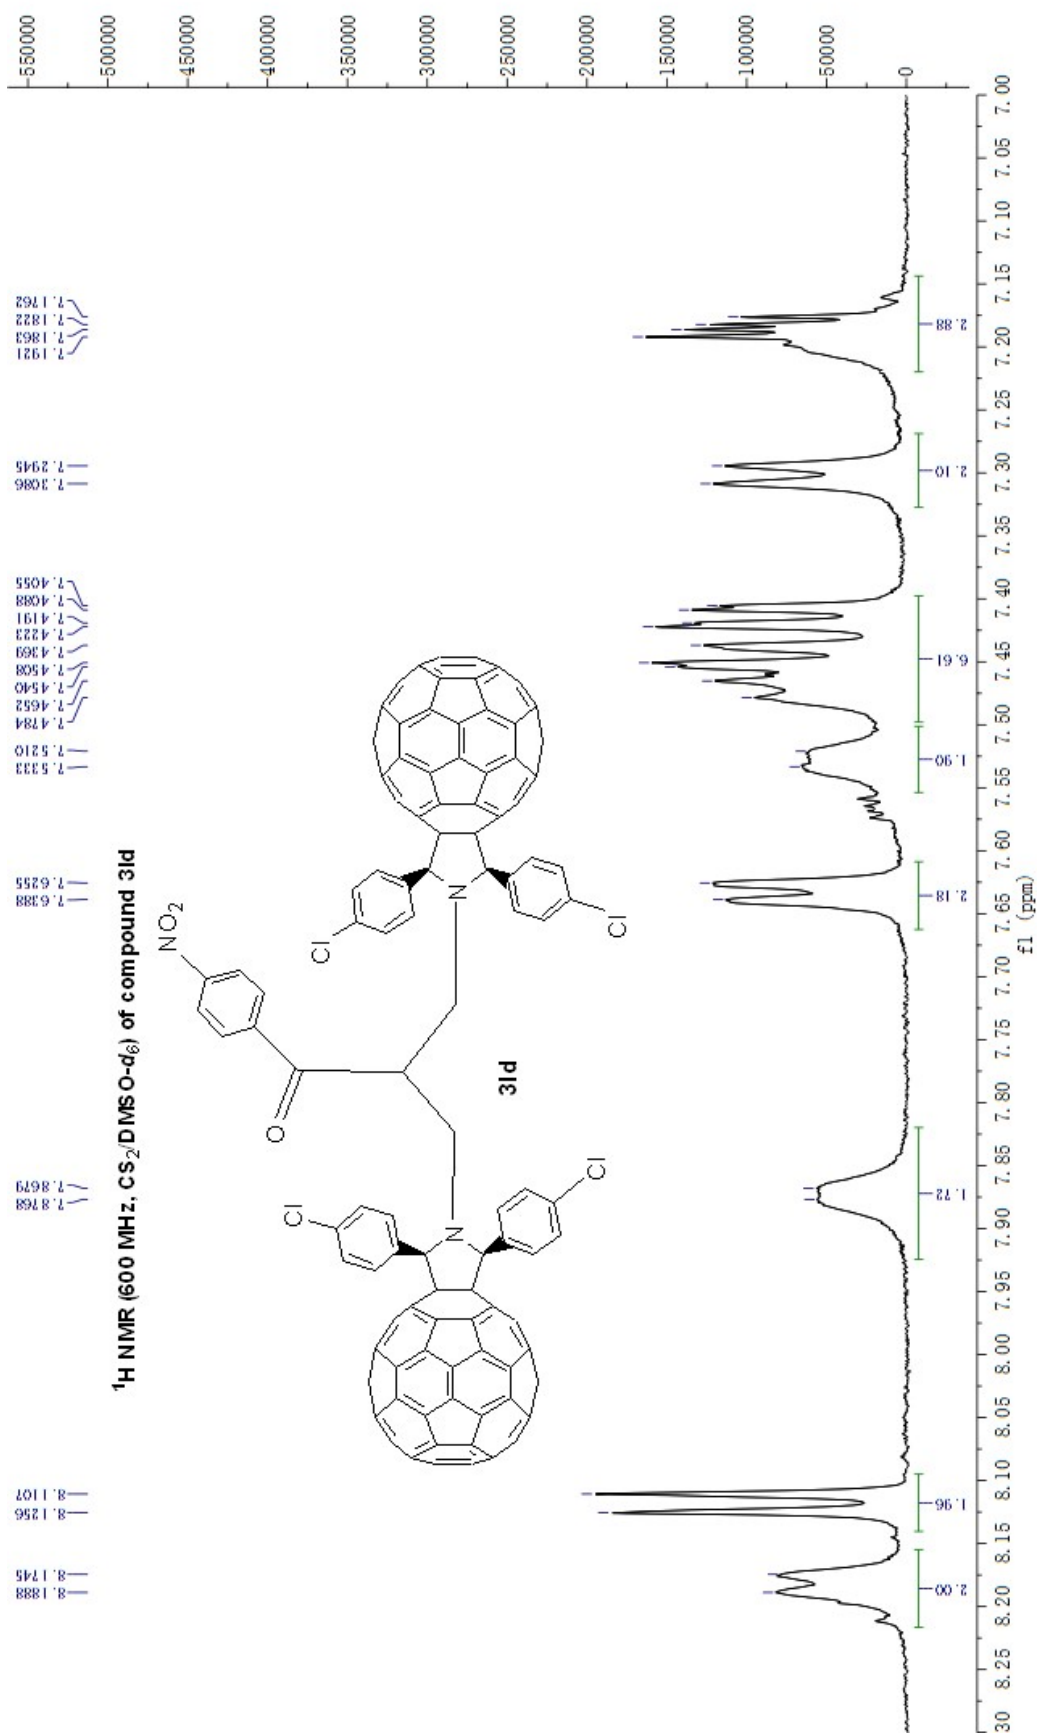

Supplement: d3ob00365e1.pdf [file d3ob00365e1.pdf]
